# Supplementary material for: Barriers and facilitators to cervical cancer screening for women from culturally and linguistically diverse backgrounds; a qualitative study of GPs
Source: PubMed Central journal article supplement — BMJ Open. 2022 Nov 14;12(11):e062823. doi: 10.1136/bmjopen-2022-062823 (PMC9664274; doi:10.1136/bmjopen-2022-062823), 2022-11-14
Supplement: bmjopen-2022-062823.draft_revisions.pdf [file bmjopen-2022-062823.draft_revisions.pdf]

# BMJ Open

BMJ Open is committed to open peer review. As part of this commitment we make the peer review history of every article we publish publicly available.

When an article is published we post the peer reviewers' comments and the authors' responses online. We also post the versions of the paper that were used during peer review. These are the versions that the peer review comments apply to.

The versions of the paper that follow are the versions that were submitted during the peer review process. They are not the versions of record or the final published versions. They should not be cited or distributed as the published version of this manuscript.

BMJ Open is an open access journal and the full, final, typeset and author-corrected version of record of the manuscript is available on our site with no access controls, subscription charges or pay-per-view fees (<http://bmjopen.bmj.com>).

If you have any questions on BMJ Open's open peer review process please email [info.bmjopen@bmj.com](mailto:info.bmjopen@bmj.com)

# BMJ Open

## Barriers and facilitators to cervical cancer screening for women from culturally and linguistically diverse backgrounds; a qualitative study of GPs

|                               |                                                                                                                                                                                                                                                                                           |
|-------------------------------|-------------------------------------------------------------------------------------------------------------------------------------------------------------------------------------------------------------------------------------------------------------------------------------------|
| Journal:                      | <i>BMJ Open</i>                                                                                                                                                                                                                                                                           |
| Manuscript ID                 | bmjopen-2022-062823                                                                                                                                                                                                                                                                       |
| Article Type:                 | Original research                                                                                                                                                                                                                                                                         |
| Date Submitted by the Author: | 12-Mar-2022                                                                                                                                                                                                                                                                               |
| Complete List of Authors:     | Chandrakumar, Abira; The University of Adelaide, Adelaide Medical School; GPEX Ltd<br>Hoon, Elizabeth; The University of Adelaide, Adelaide Medical School<br>Benson, Jill; GPEX Ltd<br>Stocks, Nigel; The University of Adelaide Adelaide Medical School, Discipline of General Practice |
| Keywords:                     | REPRODUCTIVE MEDICINE, PREVENTIVE MEDICINE, PRIMARY CARE                                                                                                                                                                                                                                  |
|                               |                                                                                                                                                                                                                                                                                           |

SCHOLARONE™  
Manuscripts

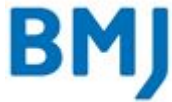

I, the Submitting Author has the right to grant and does grant on behalf of all authors of the Work (as defined in the below author licence), an exclusive licence and/or a non-exclusive licence for contributions from authors who are: i) UK Crown employees; ii) where BMJ has agreed a CC-BY licence shall apply, and/or iii) in accordance with the terms applicable for US Federal Government officers or employees acting as part of their official duties; on a worldwide, perpetual, irrevocable, royalty-free basis to BMJ Publishing Group Ltd ("BMJ") its licensees and where the relevant Journal is co-owned by BMJ to the co-owners of the Journal, to publish the Work in this journal and any other BMJ products and to exploit all rights, as set out in our [licence](#).

The Submitting Author accepts and understands that any supply made under these terms is made by BMJ to the Submitting Author unless you are acting as an employee on behalf of your employer or a postgraduate student of an affiliated institution which is paying any applicable article publishing charge ("APC") for Open Access articles. Where the Submitting Author wishes to make the Work available on an Open Access basis (and intends to pay the relevant APC), the terms of reuse of such Open Access shall be governed by a Creative Commons licence – details of these licences and which [Creative Commons](#) licence will apply to this Work are set out in our licence referred to above.

Other than as permitted in any relevant BMJ Author's Self Archiving Policies, I confirm this Work has not been accepted for publication elsewhere, is not being considered for publication elsewhere and does not duplicate material already published. I confirm all authors consent to publication of this Work and authorise the granting of this licence.

1  
2  
3  
4 1  
5  
6  
7 2 **Barriers and facilitators to cervical cancer screening for women**  
8  
9  
10 3 **from culturally and linguistically diverse backgrounds; a**  
11  
12  
13 4 **qualitative study of GPs**  
14

15 5 Abira Chandrakumar<sup>1,2\*</sup> Elizabeth Hoon<sup>1</sup> Jillian Benson<sup>2</sup> Nigel Stocks<sup>1</sup>  
16  
17  
18 6

19  
20 7 1. *Discipline of General Practice, The University of Adelaide, Adelaide, Australia*  
21

22 8 2. *GPEX Ltd., 132 Greenhill Road, Unley, South Australia, Australia*  
23  
24  
25 9

26  
27 10  
28  
29 11 **Correspondence:** Abira Chandrakumar, *Discipline of General Practice, The University of*  
30  
31 12 *Adelaide, Adelaide, Australia*, Email: [abira.chandrakumar@adelaide.edu.au](mailto:abira.chandrakumar@adelaide.edu.au)  
32  
33  
34 13

35  
36 14  
37  
38 15 **Word count (excluding title page, abstract, references, figures and tables):** 4735  
39

40 16 **Key words:** cervical cancer screening; barriers; facilitators; GPs  
41  
42  
43 17  
44  
45  
46  
47  
48  
49  
50  
51  
52  
53  
54  
55  
56  
57  
58  
59  
60

1  
2  
3 18 **ABSTRACT**  
4  
5

6 19 **Objective** To explore general practitioners' (GPs) perspectives on the barriers and facilitators  
7  
8 20 to cervical cancer screening (CCS) for women from culturally and linguistically diverse  
9  
10 21 (CALD) backgrounds.  
12

13  
14 22  
15  
16 23 **Design** Qualitative descriptive study involving semi-structured interviews, with interview guide  
17  
18 24 utilising the Theoretical Domains Framework.  
19  
20  
21

22 25  
23  
24  
25 26 **Setting** Adelaide, South Australia.  
26  
27  
28 27

29  
30 28 **Participants** Twelve GPs with experience in providing CCS to women from CALD  
31  
32 29 backgrounds participated.  
33  
34  
35

36 30  
37  
38  
39 31 **Results** Four main themes emerged: 'importance of clinician-patient relationship', 'patients'  
40  
41 32 cultural understanding regarding health care and CCS', 'communication and language' and  
42  
43 33 'health-system related'. Each theme had several subthemes. GPs' professional relationship  
44  
45 34 with their patients and repeated advice from other clinicians, together with the provision of  
46  
47 35 opportunistic CCS, were described as facilitators, and encompassed the theme of 'importance  
48  
49 36 of clinician-patient relationship'. This theme also raised the possibility of self-collection  
50  
51 37 human papilloma virus (HPV) tests. Lack of awareness and knowledge, lower priority for  
52  
53 38 cancer screening, and patients' individual circumstances contributed to the theme of  
54  
55 39 'patients' cultural understanding regarding health care and CCS', and often acted as barriers  
56  
57 40 to CCS. 'Communication and language' consisted of language difficulties, interpreter use,  
58  
59  
60

1  
2  
3 41 and use of appropriate resources. Language difficulties was a barrier to the provision of CCS,  
4  
5 42 and GPs used interpreters and written handouts to help overcome this. The theme of ‘health-  
6  
7 43 system related’ involved the increased time needed for CCS consults for CALD women,  
8  
9 44 access to appointments, funding, health promotion and effective use of practice management  
10  
11 45 software.  
12  
13  
14  
15  
16  
17

18 47 **Conclusions** This study highlights that multiple, inter-related barriers and facilitators  
19  
20 48 influence CALD women’s engagement with CCS, and that GPs needed to manage all of these  
21  
22 49 factors in order to encourage CCS participation. More efforts are needed to address the  
23  
24 50 barriers to ensure that GPs have access to appropriate resources, and CALD patients have  
25  
26 51 access to GPs they trust.  
27  
28  
29

## 30 52 **STRENGTHS AND LIMITATIONS**

- 31  
32  
33 53 - The use of qualitative methodology allowed for in-depth exploration of GPs’  
34  
35 54 experiences in providing cervical cancer screening to women from CALD  
36  
37 55 backgrounds
- 38  
39 56 - The use of the Theoretical Domains Framework in the interview guide and study  
40  
41 57 discussion, provided an evidence-based approach for study interpretation
- 42  
43 58 - GPs who participated in our study had a general interest in improving cervical cancer  
44  
45 59 screening participation for CALD women, so their experiences may not be reflective  
46  
47 60 of all GPs in Australia
- 48  
49 61 - Participants were drawn from metropolitan South Australia only, and GPs from other  
50  
51 62 areas in Australia, including rural areas, may add further to the study  
52  
53  
54  
55  
56  
57  
58  
59  
60

## 64 **INTRODUCTION**

65 Worldwide, cervical cancer is the fourth most common cancer in women; in both incidence  
66 and mortality, with the highest burden in countries without cervical screening programs(1, 2).

67 Cervical cancer should largely be preventable, through human papilloma virus (HPV)  
68 immunisation and effective screening programs(2). In Australia, the renewed National  
69 Cervical Screening Program (rNCSP) has been in place since 1 December 2017,  
70 recommending asymptomatic women aged 25-74 years undertake HPV screening tests every  
71 five years, replacing two-yearly Pap smears(2-4).

72 However, participation in cervical cancer screening (CCS) remains low, with the Australian  
73 Institute of Health and Welfare reporting that during 2018–2019, only 46% of eligible  
74 women had a screening HPV test as part of the rNCSP(2). It is well-established that a  
75 significant risk factor for the development of cervical cancer is under-screening or never  
76 being screened(2, 3). Therefore, less than half of eligible women participating in CCS, in a  
77 country with a well-developed screening program, needs to be addressed, in particular as  
78 Australia plans to eliminate cervical cancer by 2035(5).

79 Current literature suggests that inequalities in screening persist with lower rates of CCS in  
80 women from culturally and linguistically diverse (CALD) backgrounds(6, 7). Australia is a  
81 multicultural nation, with growing migrant populations, and this calls to strengthen our  
82 healthcare access and outcomes for these populations(8). Addressing such inequalities will be  
83 key to Australia's success in eliminating cervical cancer.

84 Research has been performed in Australia(6, 7, 9) and internationally(10-14) exploring  
85 CALD patients' perspectives on the barriers and facilitators to CCS. Patient barriers have  
86 included poor health literacy, cultural beliefs and stigma, and English proficiency(6, 10, 12).  
87 Comparably, linguistic strategies, and increasing patients' awareness surrounding CCS are

1  
2  
3 88 described as facilitators(12, 13). Although international studies have explored health care  
4  
5 89 providers' (HCP) perspectives on CCS; reporting barriers and facilitators relating to  
6  
7  
8 90 knowledge, communication, and access to healthcare services(15-17), very little is known  
9  
10 91 about Australian HCP perspectives on this issue. To the best of the authors' knowledge,  
11  
12 92 Australian general practitioners' (GPs) perspectives on barriers and facilitators to CCS in  
13  
14 93 CALD patients have not been documented.

15  
16  
17 94 Therefore, this study aims to explore GPs' perspectives on the barriers and facilitators to CCS  
18  
19 95 for women from CALD backgrounds. By discovering the views of those who primarily  
20  
21 96 provide CCS in the community, we aim to gain a deeper understanding of the barriers faced  
22  
23 97 in every-day clinical practice, and insights into factors that can be used to increase  
24  
25 98 participation in CCS for these women.  
26  
27  
28  
29  
30 99

## 31 32 33 100 **METHODS**

### 34 35 101 **Study design and setting**

36  
37  
38 102 A qualitative descriptive study involving in-depth semi-structured interviews was conducted  
39  
40 103 in Adelaide, South Australia. Semi-structured interviews enabled exploration of participants'  
41  
42 104 experiences. The interviews were undertaken by the lead author, AC; a GP Registrar.  
43  
44  
45

### 46 105 **Recruitment**

47  
48  
49 106 Study participants were recruited through purposive sampling. General practices located in  
50  
51 107 communities with migrant populations, registered with GPEx (South Australia's Regional  
52  
53 108 Training Organisation for General Practice Registrars), and/or professional contacts of  
54  
55 109 Discipline of General Practice at The University of Adelaide, were identified, and GPs with  
56  
57 110 experience in providing cervical screening tests (CSTs) to women from CALD backgrounds  
58  
59  
60



1  
2  
3 111 were invited to participate in interviews through email, telephone, or snowballing methods.

4  
5 112 GPs were reimbursed with a \$AUD100 gift card for their time.

6  
7  
8 113 **Data collection**

9  
10  
11 114 A semi-structured interview guide utilising the Theoretical Domains Framework (TDF)(18)

12  
13  
14 115 was developed by AC and EH, who has extensive experience in qualitative methodologies.

15  
16 116 TDF provided a method to understand GPs' and patients' behaviours related to CCS

17  
18 117 theoretically(19). The interview guide covered questions regarding GPs' experiences in

19  
20 118 working with women from CALD backgrounds, in particular relating to CCS and its

21  
22 119 associated barriers and facilitators. Two pilot interviews were undertaken to develop AC's

23  
24 120 interview skills, and minor revisions to the interview guide were made based on feedback.

25  
26 121 Data from the pilot interviews were not included in the final analysis.

27  
28  
29  
30 122 A total of twelve interviews were conducted between May and September 2021. Ten were

31  
32 123 conducted via telephone and two via video teleconference (using Zoom application). The use

33  
34 124 of remote technology improved access for participants. Interviews lasted between 19 and 35

35  
36 125 minutes. Written informed consent was received from all participants prior to interviews.

37  
38 126 Field notes were taken by AC during each interview.

39  
40  
41  
42 127 **Data analysis**

43  
44  
45 128 All but one of the interviews were digitally audio-recorded and transcribed verbatim. One

46  
47 129 participant did not consent to audio-recording, and comprehensive written notes were instead

48  
49 130 taken with their consent. AC listened to all audio-recordings in full and cross-checked them

50  
51 131 with the transcripts for accuracy. Any identifying information was removed from the

52  
53 132 transcripts.

54  
55  
56  
57 133 Braun & Clarke's six-phase theoretical framework guided thematic analysis(20). Hard copies

58  
59 134 of transcripts were reviewed by AC prior to coding, producing a brief summary outlining the

1  
2  
3 135 key findings within each transcript. Data were managed using QSR N-Vivo software. Codes  
4  
5  
6 136 were generated inductively. Initial codes were generated by independent coding of three  
7  
8 137 transcripts by AC, EH and JB, and agreed upon through discussion. The subsequent  
9  
10 138 transcripts were coded by AC, and discussed regularly with EH, JB and NS for refinement.  
11  
12 139 The final codes were refined and structured into themes and sub-themes. Two further  
13  
14  
15 140 interviews were undertaken after data saturation at ten interviews, to confirm the findings.  
16

### 17 141 **Patient and public involvement**

18  
19  
20 142 Our study focussed on GPs' perspectives on the barriers and facilitators to CCS for women  
21  
22  
23 143 from CALD backgrounds, and patients and the public were not involved at this stage.  
24  
25

26 144

## 27 145 **RESULTS**

### 28 146 **Participant characteristics**

29  
30  
31 147 The characteristics of the 12 participants are in Table 1. 92% of the GPs were female. 8 GPs  
32  
33  
34 148 (67%) used another language for consulting (in addition to English).  
35  
36  
37

38  
39 149 **TABLE 1: Characteristics of the participants**  
40  
41

| 42 Characteristics | 43 GP Participants ( <i>n</i> =12) |
|--------------------|------------------------------------|
| 44 Age (years)     |                                    |
| 45     ≤ 35        | 46 2                               |
| 47     36 – 54     | 48 9                               |
| 49     ≥ 55        | 50 1                               |
| 51 Sex             |                                    |
| 52     Female      | 53                                 |

|                                                  |    |
|--------------------------------------------------|----|
| Male                                             | 11 |
|                                                  | 1  |
| Length of practice as GP (years)                 |    |
| <5                                               | 3  |
| 5 – 15                                           | 4  |
| >15                                              | 5  |
| Clinical workload as GP per week (hours)         |    |
| 0 – 15                                           | 2  |
| 16 – 30                                          | 5  |
| >30                                              | 5  |
| Languages used for consulting other than English |    |
| Nil (other than English)                         | 4  |
| Bengali                                          | 3  |
| Mandarin/ Chinese                                | 2  |
| Urdu                                             | 2  |
| Vietnamese                                       | 1  |

150

## 151 Themes

152 Four major themes are reported based on our analysis. Within each theme, several sub-  
 153 themes are identified, and supported by quotations from the interviews. These are described  
 154 below. Themes and sub-themes are also summarised in Table 2.

## 155 TABLE 2: Themes and sub-themes

| Themes                                                                                                             | Sub-themes                                                                                                                                                                                                                                                                                                                                                                                                                                                                                                                                                                          |
|--------------------------------------------------------------------------------------------------------------------|-------------------------------------------------------------------------------------------------------------------------------------------------------------------------------------------------------------------------------------------------------------------------------------------------------------------------------------------------------------------------------------------------------------------------------------------------------------------------------------------------------------------------------------------------------------------------------------|
| <ul style="list-style-type: none"> <li>• Importance of clinician-patient relationship</li> </ul>                   | <ul style="list-style-type: none"> <li>• GPs' professional relationship with their patients</li> <li>• Providing opportunistic CSTs</li> <li>• Other clinician-patient relationships</li> <li>• Self-collection HPV tests</li> </ul>                                                                                                                                                                                                                                                                                                                                                |
| <ul style="list-style-type: none"> <li>• Patients' cultural understanding regarding health care and CCS</li> </ul> | <ul style="list-style-type: none"> <li>• Lack of awareness and knowledge</li> <li>• Lower priority for cancer screening               <ul style="list-style-type: none"> <li>○ Not on patients' agenda</li> <li>○ Patients' subjective beliefs and perceptions of low risk</li> <li>○ Covid-19 pandemic</li> </ul> </li> <li>• Importance of patients' individual circumstances               <ul style="list-style-type: none"> <li>○ Patient concerns surrounding physical examination</li> <li>○ Influence of relatives</li> <li>○ Previous sexual trauma</li> </ul> </li> </ul> |
| <ul style="list-style-type: none"> <li>• Communication and language</li> </ul>                                     | <ul style="list-style-type: none"> <li>• Language difficulties</li> <li>• Interpreter use</li> <li>• Use of appropriate resources</li> </ul>                                                                                                                                                                                                                                                                                                                                                                                                                                        |

|                                                                           |                                                                                                                                                                                                         |
|---------------------------------------------------------------------------|---------------------------------------------------------------------------------------------------------------------------------------------------------------------------------------------------------|
| <ul style="list-style-type: none"> <li>• Health-system related</li> </ul> | <ul style="list-style-type: none"> <li>• Increased time needed</li> <li>• Access to appointments</li> <li>• Funding</li> <li>• Health promotion</li> <li>• Use of practice management system</li> </ul> |
|---------------------------------------------------------------------------|---------------------------------------------------------------------------------------------------------------------------------------------------------------------------------------------------------|

156

## 157 **Theme 1: Importance of clinician-patient relationship**

### 158 **1.1 GPs' professional relationship with their patients**

159 GPs identified several helpful factors in providing CSTs to women from CALD backgrounds.

160 These included their professional experience providing CSTs, length of experience in  
 161 working with CALD women, and being a female GP.

162 *“I see a lot of Vietnamese patients ...[but] I see everybody else, not just Vietnamese.  
 163 So... Thai, Israel, Iran, African, everybody” (GP8).*

164 Being a male GP was identified as a barrier, as patients were less likely to see a male GP for  
 165 CSTs.

166 *“My experience is that as a male doctor, we have to be very clear about how... we  
 167 approach cervical screening” (GP4).*

168 A continuing doctor-patient relationship was frequently a facilitator.

169 *“To have a long-term GP or someone you're familiar with is really helpful... So, they  
 170 will let you do what you think is good for them or they will bring it up because they're  
 171 comfortable” (GP8).*

1  
2  
3 172 GPs also described the importance of building rapport with their patient to facilitate screening  
4  
5 173 discussions.

6  
7  
8 174 *“I build rapport and build a relationship with the patient first. So that then they trust*  
9  
10 175 *me more... about some of these more sensitive issues and exams, and are more likely*  
11  
12 176 *to agree to it later down the track” (GP7).*

13  
14  
15  
16 177

## 178 **1.2 Providing opportunistic CSTs**

19  
20  
21  
22 179 Being opportunistic was important. This included initiating the first discussion regarding  
23  
24 180 CCS, and seeking out the opportunity during other care provision, such as during preparation  
25  
26 181 of chronic disease GP management plans, peri-partum consults, and consults surrounding  
27  
28 182 sexual health.

29  
30  
31 183 *“I think just being opportunistic... for the practitioner to be aware to offer these*  
32  
33 184 *primary health prevention measures... to incorporate the cervical screening... and*  
34  
35 185 *offer it all the time” (GP5)*

36  
37  
38 186 GPs described that they needed to be aware of the lower screening rates in women from  
39  
40 187 CALD backgrounds, and take the initiative to raise CCS with them.

41  
42  
43 188 *“Being conscious of the fact that often people of these backgrounds are under-*  
44  
45 189 *screened so that then we can make up for it by putting in that special effort” (GP7)*

46  
47  
48  
49 190

## 50 51 52 191 **1.3 Other clinician-patient relationships**

53  
54  
55 192 Repeated advice regarding CCS from multiple health care providers, including practice  
56  
57 193 nurses and hospital midwives, was described as a facilitator.

58  
59  
60 194

1  
2  
3 195 *“One thing that has really helped, if there's multiple health care providers telling*  
4  
5 196 *them the same things”* (GP9).

6  
7  
8 197

#### 11 198 **1.4 Self-collection HPV tests**

14 199 Most participants were aware of the availability of self-collection HPV tests under the rNCSP  
15  
16 200 for under-screened women and viewed the tests positively, describing that *“it's a good*  
17  
18 201 *opportunity to screen the under-screened patient”* (GP11).

22 202 However, GPs also identified several challenges to self-collection tests. Many of these relate  
23  
24 203 to the already identified barriers in our findings, and are described in a further article by the  
25  
26 204 same authors.

27  
28  
29 205

### 32 206 **Theme 2: Patients' cultural understanding regarding health care and CCS**

#### 35 207 **2.1 Lack of awareness and knowledge**

38 208 Lack of awareness and access to reliable information regarding the rNCSP and cervical  
39  
40 209 cancer were significant barriers. GPs reported that CSTs were a new concept to some  
41  
42 210 patients, whilst others may have heard of CSTs (or pap smears), but had limited knowledge  
43  
44 211 about their purpose, the procedure involved, or about cervical cancer.

47 212 *“If they don't understand how important it is, they're just not going to accept it”*  
48  
49 213 (GP9).

52 214 It was reported that some patients' knowledge gap was universal for all screening programs  
53  
54 215 offered in Australia.

57 216 *“It's not just about [CCS]. It was about bowel cancer screening... mammograms as*  
58  
59 217 *well”* (GP9).

1  
2  
3 218 Participants also reflected on the differences in participation between different cultural  
4  
5 219 groups.

6  
7  
8 220 “...[Patients from] Cambodia, who have equivalent programs there... had raised it  
9  
10 221 with me, and asked when they're going to be due here” (GP7).

11  
12  
13 222 Conversely, migration from countries without CCS deepened the lack of awareness.

14  
15  
16 223 “Sometimes it's just, sort of, lack of exposure to this knowledge... they've recently  
17  
18 224 come here... back in their countries, this doesn't exist” (GP9).

19  
20  
21  
22 225

## 23 24 25 226 **2.2 Lower priority for cancer screening**

### 26 27 28 227 **2.2.1 Not on patients' agenda**

29  
30  
31 228 GPs described that women from CALD backgrounds often viewed CCS with less importance  
32  
33 229 and priority, and it was commonly not on a patient's agenda when presenting to her GP.

34  
35  
36 230 Participants identified that multiple factors were often involved in preventive care taking “a  
37  
38 231 bit of a sideline” (GP7). Patients from CALD backgrounds often presented with acute  
39  
40 232 medical issues, which may be more complex, requiring more time within the consult.

41  
42  
43 233 “You've got so much other stuff to get through and everything's taking a bit longer  
44  
45 234 generally. I've also got quite a few women from refugee backgrounds who, I guess,  
46  
47 235 are going through a lot of difficult things and sometimes find it hard just to get to the  
48  
49 236 doctor and make it to appointments and when they come, [they] have quite a few  
50  
51 237 pressing issues that need to be addressed. And so, a lot of that preventative stuff can  
52  
53 238 get lost in the background a bit unfortunately” (GP7).

54  
55  
56  
57  
58 239  
59  
60



## 2.2.2 Patients' subjective beliefs and perceptions of low risk

240  
241 GPs described that some patients had pre-determined beliefs, and false perceptions of low  
242 risk, regarding CCS. This included beliefs that they would not contract HPV as a result of the  
243 same lifetime sexual partner, with some patients having difficulty acknowledging "*how they*  
244 *got [HPV]*" (GP6).

245 GPs also identified that some patients believed their older age lowered their risk of cervical  
246 cancer.

247 "*Ones that are like over 60... over 65... or that they have no longer have a sexual*  
248 *partner. And then mistakenly think that, well, because they [are] not sexually*  
249 *active... they don't have to do anything*" (GP8).

250

## 2.2.3 Covid-19 pandemic

251  
252 The COVID-19 pandemic was also described to have impacted CCS participation; across  
253 women from all backgrounds.

254 "*During the [COVID-19] pandemic... we've seen a marked decrease in the number of*  
255 *people presenting for just primary screening*" (GP5).

256

## 2.3 Importance of patients' individual circumstances

### 2.3.1 Patient concerns surrounding physical examination

257  
258  
259 A common report was patients' reluctance and embarrassment surrounding cervical  
260 examinations, as they involve speculums and can be intrusive.

261 "*I find that... women from particular cultures... could be quite ashamed to get*  
262 *exposed... does make the actual procedure sometimes a little bit difficult*" (GP12).

1  
2  
3 263 Patients were less comfortable with CSTs when children were present, and it was difficult for  
4  
5 264 GPs to manage supervising the children and performing the examination.  
6  
7

8 265 *“I do think sometimes young woman with really tiny children, it could be a real*  
9  
10 266 *barrier to get the time. They never get a chance to come in without their kids”*  
11  
12  
13 267 (GP1).  
14  
15

### 16 268 **2.3.2 Influence of relatives**

17  
18  
19 269 GPs noted that if a patient’s relatives were not participating, this reduced the patient’s own  
20  
21 270 willingness to engage with CCS.  
22  
23

24 271 *“There are some beliefs and they've reached a certain age and like they just outright*  
25  
26 272 *say "none of my sisters and mothers have had it and they're fine"”* (GP9).  
27  
28

29 273 However, relatives can also have a positive influence, with some GPs describing that the  
30  
31 274 presence of a support person, in particular daughters bringing their mothers, had improved  
32  
33 275 uptake.  
34  
35

36  
37 276 *“Another thing I’ve found helpful is, I’ve had a few patients from different cultural*  
38  
39 277 *backgrounds where the daughter and the mom have come together for their pap*  
40  
41 278 *smears, and the daughter... interpreted for the mom... the daughter has encouraged*  
42  
43 279 *the mum to come along”* (GP7).  
44  
45  
46

### 47 280 **2.3.3 Previous sexual trauma**

48  
49  
50 281 A history of female genital mutilation was raised by some GPs as negatively affecting CCS  
51  
52 282 participation, with an emphasis on the need for GPs to be more sensitive and respectful about  
53  
54 283 this issue.  
55  
56  
57  
58  
59  
60

1  
2  
3 284 *“Women that have had genital mutilation...exploring... how comfortable they are and*  
4  
5 285 *the sort of speculum that you might choose... a bit more gently you might go about it’*  
6  
7  
8 286 (GP10).  
9

10  
11 287 Similarly, cervical examinations can be distressing for patients with a history of sexual abuse.  
12  
13  
14 288 *“I’ve found much more barriers when women have been in sexual abuse”* (GP1).  
15

16  
17 289

### 19 290 **Theme 3: Communication and language**

#### 22 291 **3.1 Language difficulties**

23  
24  
25 292 Most participants described challenges in promoting CCS when speaking a different language  
26  
27 293 to their patient, or when patients were not fluent in English.

28  
29  
30 294 *“Its a difficulty explaining [CSTs] in their own terms... what exactly this means”*  
31  
32 295 (GP12).  
33

34  
35 296 Using simple words helped with communication, as did the use of anatomy models and visual  
36  
37 297 aids.

38  
39  
40 298 *“[I] find this a new concept and [women from CALD backgrounds] have absolutely*  
41  
42 299 *no idea... I say this is a cancer screening... I may show a picture”* (GP4).  
43  
44

45  
46 300 *“I really show them the speculum, probably tell them that there are smaller ones if*  
47  
48 301 *they were worried about internal exams, actually showing the brush and let them*  
49  
50 302 *have a feel of the brush”* (GP5).  
51

#### 53 303 **3.2 Interpreter use**

54  
55  
56 304 Language barriers were often overcome by using interpreters. GPs valued effective  
57  
58 305 communication, with one GP reflecting that CCS is *“something that good communication is*  
59  
60

1  
2  
3 306 *absolutely crucial for, to make sure you're getting proper consent and the patient is really*  
4  
5 307 *comfortable” (GP7).*  
6  
7

8 308 Easy access to telephone interpreters was important, but challenges included inconvenience,  
9  
10 309 increased time, miscommunication errors, and sensitivities in using an interpreter for a  
11  
12 310 gynaecological examination.  
13  
14

15  
16 311 *“In an ideal circumstance, you'd have a telephone interpreter... that take 5 minutes*  
17  
18 312 *to line up at best... maybe it's something that you can plan for another day” (GP2).*  
19  
20

21 313 Another GP shared that using family members as interpreters provides variable results.  
22

23  
24 314 *“A relative could be good or they could be terrible... could talk over with them*  
25  
26 315 *afterwards and say this is what it's about” (GP1).*  
27  
28

### 29 316 **3.3 Use of appropriate resources**

30  
31 317 GPs used written handouts, and highlighted the value of providing reliable information to  
32  
33 318 patients in their own language. Some GPs were aware of where to access such information,  
34  
35 319 whilst others expressed the need for easier access to these resources.  
36  
37

38  
39 320 *“Something that could be useful would be to look into if there's pamphlets or*  
40  
41 321 *information sheets in various languages that could be given to patients” (GP7).*  
42  
43

44 322 Waiting room resources, such as posters and pamphlets, were mentioned as impacting patient  
45  
46 323 education and awareness. Additionally, written resources regarding the rNCSP was raised as  
47  
48 324 important in the provision of consistent information.  
49  
50

51 325 *“It can be confusing for the patients about how it's swapped over [to rNCSP], but*  
52  
53 326 *probably some kind of handout you can give for that” (GP1).*  
54  
55

56 327

## 58 328 **Theme 4: Health-system related**

#### 4.1 Increased time needed

330 Allocating sufficient time was key to improving uptake, particularly in the presence of  
331 language barriers and interpreters. GPs employed strategies such as longer appointments, or  
332 discussions over multiple appointments.

333 *“You have to warn them... bring them back again and see if they’ve got any question,  
334 so maybe third time finally you’d do [the CST]”* (GP1).

335 GPs expressed concerns regarding non-attendance when patients are asked to re-schedule  
336 appointments.

337 *“I think that anything where you raise it and then try and think that they’ll come  
338 back, you lose... your opportunity... they don’t return. So, one of the advantages is if  
339 you are comfortable you can do it quite quickly, then you get it all done and dusted in  
340 that consultation”* (GP10).

341 GPs also identified the need for investing more time in explaining and performing CSTs.

342 *“I have to explain [CSTs] before I go ahead. So that’s the challenge... Rather than  
343 the [non-CALD] population, they would be expecting, they know what is going to  
344 happen and how we interpret”* (GP3).

345 However, GPs described time-pressure challenges when spending more time on one  
346 particular health issue, or when attempting to schedule multiple aspects of care into one  
347 consultation.

348 *“Now there’s even the cervical cancer vaccine that needs to be brought up as well. So,  
349 it’s a lot to talk about.”* (GP8).

350

#### 4.2 Access to appointments

1  
2  
3 352 Improving access to appointments can improve a patient's participation in screening. Some  
4  
5 353 GPs suggested the use of women-only or CCS-specific clinics.

6  
7  
8 354 *"We can even run like a cervical screening clinic, as a separate one... where it could*  
9  
10 355 *be like women presenting and it could be a more welcoming environment for the*  
11  
12  
13 356 *women."* (GP12).

14  
15  
16 357 Additionally, GPs reflected upon the possibility of easily accessible appointment times to  
17  
18 358 encourage wider participation.

19  
20  
21 359 *"It's interesting to see how many women come on a Saturday morning for cervical*  
22  
23 360 *screening... I'm sure that might be the same for CALD backgrounds"* (GP10).

24  
25  
26 361 Some GPs also described transport access issues, and the need for some patients to rely on  
27  
28 362 family members to attend appointments.

29  
30  
31 363 *"Maybe accessing the service could be a problem for them. Maybe they are*  
32  
33 364 *dependent on their husband or somebody else to make an appointment for them and*  
34  
35 365 *bring them for the test."* (GP12).

### 36 366 **4.3 Funding**

37  
38  
39 367 Issues surrounding Medicare eligibility and costs of CCS were raised as barriers, particularly  
40  
41 368 when coupled with the lack of perceived necessity.

42  
43 369 *"If they don't hold a Medicare [card] and they have got some sort of a private*  
44  
45 370 *insurance... do they think they might have to pay for some tests? They perceive this as*  
46  
47 371 *an unimportant task"* (GP9).

48  
49 372 One GP reflected that working in a bulk-billing clinic acted as a facilitator for these patients.  
50  
51  
52  
53  
54  
55  
56  
57  
58  
59  
60

1  
2  
3 373 *“For screening, if there's nothing that's wrong with [women from CALD*  
4  
5 374 *backgrounds], I don't think that they will pay... I don't think that I will be as*  
6  
7  
8 375 *successful, as I am, running the screening program, if I charge this woman” (GP8).*  
9

10 376 However, the GP also mentioned that more funding should be allocated to facilitating CCS,  
11  
12  
13 377 in particular for under-screened populations.

14  
15  
16 378 *“I think, for us, the funding would be a big thing. To give us more time so we can*  
17  
18 379 *educate” (GP8).*  
19

#### 20 21 380 **4.4 Health promotion**

22  
23  
24 381 GPs advocated for culturally-sensitive public health campaigns and health promotional  
25  
26 382 materials, particularly in different languages, to raise awareness. Ideas offered included  
27  
28  
29 383 Government initiatives and campaigns, and use of social media, radio services, and  
30  
31 384 television.

32  
33  
34 385 *“Maybe some more public health campaign so that people have already been*  
35  
36 386 *introduced to the concept [of CSTs] outside of general practice” (GP2).*  
37

#### 38 39 387 **4.5 Use of practice management system**

40  
41  
42 388 An effective recall and reminder system, incorporating telephone calls, text messages and  
43  
44 389 sending letters to patients, was considered a facilitator. GPs reflected on the importance of  
45  
46  
47 390 placing patients on the reminder system to ensure follow up, and engaged their practice  
48  
49 391 nurses and receptionists to assist with recalls.

50  
51  
52 392 *“We actually spend a lot of manpower... to draw out the recalls and actively calling*  
53  
54 393 *people. Sometimes they don't respond to a message, we call them, we keep trying and*  
55  
56 394 *then we send a letter” (GP8).*  
57  
58  
59  
60

1  
2  
3 395 GPs mentioned that reminders were more effective when they were sent in patients' own  
4  
5 396 languages.

6  
7  
8 397 *"I've got a template letter for [language] ...and now I have a text message in*  
9  
10 398 *[language] ...it doesn't need to be long... but this is their language"* (GP8).

11  
12  
13 399 Additionally, GPs stated that prompts during consultations, and when booking appointments,  
14  
15  
16 400 can also increase patient participation by initiating the discussion.

17  
18  
19 401

20  
21 402 **DISCUSSION**

22  
23  
24 403 The study findings provide in-depth insight into GPs' perspectives about the barriers and  
25  
26 404 facilitators to CCS for an under-screened population group - women from CALD  
27  
28 405 backgrounds. GPs identified several barriers at the individual and organisational levels; often  
29  
30  
31 406 co-existing to challenge the provision of CCS in these women. Similarly, GPs reflected on  
32  
33 407 several personal facilitators that encouraged and increased CCS.

34  
35  
36 408 The TDF emphasises on understanding the influences on behaviour in order to encourage  
37  
38 409 behaviour change(18). This conceptual framework has been widely applied across healthcare-  
39  
40  
41 410 related research focussed on changing clinical behaviours, and was used to further interpret  
42  
43 411 our study's themes(18). We used the TDF domains of knowledge, skills, social/professional  
44  
45 412 role and identity, beliefs about consequences, environmental context and resources, and  
46  
47 413 social influences, within our interpretation. As our study demonstrates the inter-relationship  
48  
49 414 of the barriers and facilitators, our four prominent themes transect multiple domains of TDF.  
50  
51  
52 415 To highlight this, we have not described our findings under domain headings as discrete  
53  
54 416 constructs, but rather refer to these domains (*italics used to signal this*) in the following  
55  
56 417 discussion.



1  
2  
3 418 Our study found that lack of awareness or insufficient *knowledge* regarding CCS continues to  
4  
5 419 hinder screening participation in CALD women, consistent with previous literature(13, 21-  
6  
7 420 23). Knowledge gaps in the process and importance of screening often reflected low health  
8  
9 421 literacy and lack of exposure to CCS in patients' countries of birth (*environmental context*  
10  
11 422 *and resources*). GPs mentioned that patients were more proactive if they migrated from  
12  
13 423 countries where CCS is offered as primary screening. GPs also reflected that some patients'  
14  
15 424 lack of knowledge translated to other primary screening programs, such as breast cancer and  
16  
17 425 bowel cancer screening. This is not surprising given that CALD women can be unfamiliar  
18  
19 426 with preventive health services(12, 15) (*beliefs about consequences*), indicating that  
20  
21 427 widespread interventions are required to improve CALD patients' cancer screening  
22  
23 428 participation(24). Patients who did not view cancer screening, specifically CCS, with high  
24  
25 429 importance, or patients who perceived themselves to be at low risk of cervical cancer, were  
26  
27 430 less likely to present for screening (*knowledge, beliefs about consequences*). GPs identified  
28  
29 431 that CALD patients' needs can be more complex, and cancer screening was often not on their  
30  
31 432 agenda. Additionally, the COVID-19 pandemic, which has caused significant reductions in  
32  
33 433 preventive healthcare, including CCS(25), was echoed by our GPs as having a negative  
34  
35 434 impact on CCS participation rate (*environmental context and resources*).  
36  
37  
38  
39  
40  
41  
42  
43 435 It was highlighted that opportunistically offering CCS to women with low knowledge,  
44  
45 436 awareness and priority, was a significant facilitator, and at times, a necessity, in improving  
46  
47 437 uptake (*skills, social/ professional role and identity*). GPs demonstrated variable approaches  
48  
49 438 to this, with some offering it as part of chronic disease care, and others during consults  
50  
51 439 surrounding sexual health. Although other studies have also highlighted that CALD women  
52  
53 440 tend to undertake CCS when offered opportunistically(16), this was a prominent idea  
54  
55 441 amongst our participants. As CCS in Australia is commonly performed by GPs, this allows  
56  
57 442 for opportunistic care to occur, as GPs are able to perform the necessary screening test in  
58  
59  
60

1  
2  
3 443 their rooms when patients present for other reasons (*skills*). This is unique, compared to  
4  
5 444 Australia's bowel or breast cancer screening programs, which are delivered separately at  
6  
7  
8 445 national and/or state or territory level(26, 27).  
9

10 446 A patient's individual circumstance can limit their acceptance of screening, and being  
11  
12 447 respectful and addressing this was helpful in improving CCS uptake. Among the factors  
13  
14 448 discussed, physical examination concerns and influence of relatives were the most discussed.  
15  
16 449 Consistent with previous findings(22, 28), the influence of relatives either hindered or  
17  
18 450 encouraged CCS participation, depending on whether the relatives supported CCS (*social*  
19  
20 451 *influences*).  
21  
22  
23  
24

25 452 Whilst it is important to acknowledge patient-sided barriers to health care, it is imperative to  
26  
27 453 address the social and environmental influences that produce health inequities in order to  
28  
29 454 implement change(29). Another prominent finding in our study was the importance of the  
30  
31 455 clinician-patient relationship in influencing CCS uptake (*social/ professional role and*  
32  
33 456 *identity*). A GP's role in Australia is significant, with evidence that patients who have a  
34  
35 457 regular GP have better engagement with the health system(30). This is also true for CALD  
36  
37 458 populations, and it has been recognised that positive experiences with GPs can strongly  
38  
39 459 influence CALD patients' use of health services(31). The GPs in our study recognised that  
40  
41 460 their professional relationship with patients, particularly if long-standing, was an important  
42  
43 461 facilitator in encouraging CCS. Allowing time to build rapport was key as it invited trust and  
44  
45 462 familiarity(30), and allowed GPs to promote education surrounding CCS; improving CALD  
46  
47 463 patients' CCS uptake(16). Furthermore, advice from multiple HCPs regarding CCS provided  
48  
49 464 a consistent message (*social/ professional role and identity*).  
50  
51  
52  
53  
54

55 465 Barriers relating to knowledge and health literacy were often compounded by language  
56  
57 466 barriers (*environmental context and resources*). GPs reported difficulties when they did not  
58  
59  
60

1  
2  
3 467 speak the same language as their patients, and used visual aids and interpreter services to  
4  
5 468 communicate (*environmental context and resources*). Although GPs found external  
6  
7 469 interpreter services useful overall, they reflected on numerous challenges associated with  
8  
9 470 their use. This included the increased time and resources needed to organise interpreters in  
10  
11 471 consultations, which often resulted in not being able to access an interpreter, particularly with  
12  
13 472 short-notice. In Australia, GPs have access to the national Translating and Interpreting  
14  
15 473 Service (TIS), provided free-of-charge for use with non-English speaking patients(32).  
16  
17 474 However, GPs also need more time in their consultations to facilitate this. Our participants  
18  
19 475 proposed solutions such as offering multiple consultations, longer appointments, and  
20  
21 476 increased funding for such consultations. This is consistent with previous literature that  
22  
23 477 improving financial incentives for GPs to undertake longer consultations may be beneficial  
24  
25 478 for challenging and complex discussions(17, 33).

26  
27 479 Delivering information through different channels has been shown to increase participation in  
28  
29 480 CCS for CALD women(12). GPs discussed the value of written information material,  
30  
31 481 including pamphlets in patients' own languages, emphasising that GPs need to have easier  
32  
33 482 access to such resources(12, 34) (*environmental context and resources*). Additionally,  
34  
35 483 evidence suggests that screening invitations from GPs can be more trusted by patients than  
36  
37 484 invitations from screening hubs(35). This has implications for improving CCS uptake, as GPs  
38  
39 485 and practice staff routinely send reminders and recalls to patients. Our study adds to this by  
40  
41 486 highlighting that personalised reminders sent in patients' own languages was often more  
42  
43 487 effective. Therefore, more effort should be made to incorporate this for under-screened  
44  
45 488 populations (*environmental context and resources*).

46  
47 489 Another proposed solution by GPs was the use of self-collection HPV tests to reduce  
48  
49 490 inequities in CCS. Self-collection HPV tests have been increasingly studied in recent years as  
50  
51 491 an alternative for under-screened populations(36, 37). They have been implemented as part of

1  
2  
3 492 the rNCSP under strict criteria, and are generally accepted by GPs for their benefits, but also  
4  
5 493 come with challenges(37).  
6  
7

### 8 494 **Study strengths and limitations**

10  
11 495 This study's key strength was the use of appropriate research strategies. This included  
12  
13 496 ongoing corroboration between researchers during data analysis, and using an inductive  
14  
15 497 approach to data collection to ensure that participants' responses drove the analysis of results.  
16  
17 498 Additionally, the use of TDF provided an evidence-based approach for study interpretation.  
18  
19 499 This study also has limitations. Firstly, it was beyond the scope of our study to investigate  
20  
21 500 CALD patients' experiences in regards to the barriers and facilitators of CCS. Secondly,  
22  
23 501 difficulties in recruiting GPs, particularly during a pandemic, meant that experiences of only  
24  
25 502 a small number of participants has been described. However, data collection was undertaken  
26  
27 503 until data saturation was reached, with a further two participants interviewed. Another  
28  
29 504 limitation was that our sample was drawn from metropolitan South Australia only, and data  
30  
31 505 from GPs across Australia, including rural areas, may add further to the study.  
32  
33  
34  
35

### 36 506 **Conclusions**

37  
38  
39  
40 507 Our study highlights that GPs recognise that multiple factors influence CALD women's  
41  
42 508 engagement with CCS, and that these barriers and facilitators are all inter-related. Barriers at  
43  
44 509 the individual level, such as patients' subjective beliefs, are not easily fixed. However,  
45  
46 510 recognising them, providing education, and remaining sensitive remain vital in encouraging  
47  
48 511 CCS for these women. Barriers at the organisational level have opportunities for  
49  
50 512 improvement. Improving CALD women's access to GPs they trust, and GPs opportunistically  
51  
52 513 performing CSTs, seem crucial to improving uptake. Additionally, providing GPs with  
53  
54 514 appropriate written patient-specific resources, and financial reimbursement for undertaking  
55  
56 515 longer consultations, may assist in addressing some barriers. Self-collection HPV tests are an  
57  
58  
59  
60

1  
2  
3 516 evolving and promising area in supporting GPs to improve CCS uptake in CALD women, but  
4  
5 517 the above-mentioned barriers still need to be addressed in order for self-collection HPV tests  
6  
7  
8 518 to drastically improve CCS participation.  
9

10  
11 519

12  
13 520

14  
15 521 **Acknowledgements:** We would like to thank the GPs who participated in our study. The  
16  
17 522 authors also gratefully acknowledge the assistance from Dr Taryn Elliott and Ms Louise  
18  
19 523 Swan (from GPEX) with participant recruitment emails.  
20  
21  
22

23 524 **Contributors:** AC conducted all interviews under the guidance of EH and NS. AC  
24  
25 525 performed analysis of the data, and AC, EH and JB undertook interpretation of the results.  
26

27 526 AC wrote the first draft of the manuscript. AC, EH, JB and NS contributed to the conception  
28  
29 527 and study design, and all authors revised all drafts and approved the final version of the  
30  
31 528 manuscript.  
32  
33  
34

35 529 **Funding:** This research project is supported by The Royal Australian College of General  
36  
37 530 Practitioners with funding from the Australian Government under the Australian General  
38  
39 531 Practice Training Program.  
40  
41

42 532 **Competing interests:** None declared.  
43  
44

45 533 **Ethics approval:** Ethics approval was granted by the Low Risk Human Research Ethics  
46  
47 534 Review Group from The University of Adelaide. Ethics ID: H-2021-065.  
48  
49  
50

51 535 **Data availability statement:** All data relevant to the study are included in the article or  
52  
53 536 uploaded as supplementary information  
54  
55

56 537

57  
58 538  
59  
60

1  
2  
3 539**Reference list:**4  
5 540

6  
7  
8 541 1. World Health Organization. WHO guideline for screening and treatment of cervical  
9  
10 542 pre-cancer lesions for cervical cancer prevention, second edition. Geneva: World Health  
11  
12 543 Organization; 2021.

13  
14  
15 544 2. Australian Institute of Health and Welfare. National Cervical Screening Program  
16  
17 545 monitoring report 2020. Canberra: AIHW; 2020.

18  
19 546 3. Saville M, Hawkes D, McLachlan E, Anderson S, Arabena K. Self-collection for  
20  
21 547 under-screened women in a National Cervical Screening Program: pilot study. Current  
22  
23 548 oncology (Toronto). 2018;25(1):e27-32.

24  
25  
26 549 4. Australian Institute of Health and Welfare. Cervical screening in Australia 2019.  
27  
28 550 Canberra: AIHW; 2019. Contract No.: CAN 124.

29  
30  
31 551 5. Cancer Council NSW. Eliminating cervical cancer in Australia by 2035, 2021.  
32  
33 552 Available from: [https://www.cancercouncil.com.au/research-pt/eliminating-cervical-cancer-](https://www.cancercouncil.com.au/research-pt/eliminating-cervical-cancer-in-australia-by-2035/)  
34  
35 553 [in-australia-by-2035/](https://www.cancercouncil.com.au/research-pt/eliminating-cervical-cancer-in-australia-by-2035/) [Accessed 02 March 2022].

36  
37  
38 554 6. Anaman-Torgbor JA, King J, Correa-Velez I. Barriers and facilitators of cervical  
39  
40 555 cancer screening practices among African immigrant women living in Brisbane, Australia.  
41  
42 556 European Journal of Oncology Nursing. 2017;31:22-9.

43  
44  
45 557 7. Alam Z, Shafiee Hanjani L, Dean J, Janda M. Cervical Cancer Screening Among  
46  
47 558 Immigrant Women Residing in Australia: A Systematic Review. Asia Pac J Public Health.  
48  
49 559 2021;33(8):816-27.

50  
51 560 8. White J, Plompen T, Tao L, Micallef E, Haines T. What is needed in culturally  
52  
53 561 competent healthcare systems? A qualitative exploration of culturally diverse patients and  
54  
55 562 professional interpreters in an Australian healthcare setting. BMC Public Health.  
56  
57  
58 563 2019;19(1):1096.

- 1  
2  
3 564 9. Parajuli J, Horey D, Avgoulas M-I. Perceived barriers to cervical cancer screening  
4  
5 565 among refugee women after resettlement: A qualitative study. *Contemporary Nurse*.  
6  
7 566 2020;56(4):363-75.  
8  
9  
10 567 10. Marlow LA, Waller J, Wardle J. Barriers to cervical cancer screening among ethnic  
11  
12 568 minority women: a qualitative study. *J Fam Plann Reprod Health Care*. 2015;41(4):248-54.  
13  
14 569 11. Leinonen MK, Campbell S, Ursin G, Tropé A, Nygård M. Barriers to cervical cancer  
15  
16 570 screening faced by immigrants: a registry-based study of 1.4 million women in Norway. *Eur*  
17  
18 571 *J Public Health*. 2017;27(5):873-9.  
19  
20 572 12. Gele AA, Qureshi SA, Kour P, Kumar B, Diaz E. Barriers and facilitators to cervical  
21  
22 573 cancer screening among Pakistani and Somali immigrant women in Oslo: a qualitative study.  
23  
24 574 *Int J Womens Health*. 2017;9:487-96.  
25  
26 575 13. Idehen EE, Pietilä A-M, Kangasniemi M. Barriers and Facilitators to Cervical  
27  
28 576 Screening among Migrant Women of African Origin: A Qualitative Study in Finland.  
29  
30 577 *International journal of environmental research and public health*. 2020;17(20):7473.  
31  
32 578 14. Darj E, Chalise P, Shakya S. Barriers and facilitators to cervical cancer screening in  
33  
34 579 Nepal: A qualitative study. *Sexual & Reproductive Healthcare*. 2019;20:20-6.  
35  
36 580 15. Ferdous M, Lee S, Goopy S, Yang H, Rumana N, Abedin T, et al. Barriers to cervical  
37  
38 581 cancer screening faced by immigrant women in Canada: a systematic scoping review. *BMC*  
39  
40 582 *Womens Health*. 2018;18(1):165-  
41  
42 583 16. Marques P, Gama A, Santos M, Heleno B, Vermandere H, Dias S. Understanding  
43  
44 584 Cervical Cancer Screening Barriers among Migrant Women: A Qualitative Study with  
45  
46 585 Healthcare and Community Workers in Portugal. *International journal of environmental*  
47  
48 586 *research and public health*. 2021;18(14):7248.  
49  
50  
51  
52  
53  
54  
55  
56  
57  
58  
59  
60

- 1  
2  
3 587 17. Møen KA, Terragni L, Kumar B, Diaz E. Cervical cancer screening among immigrant  
4  
5 588 women in Norway- The healthcare providers' perspectives. *Scand J Prim Health Care*.  
6  
7 589 2018;36(4):415-22.
- 8  
9  
10 590 18. Atkins L, Francis J, Islam R, O'Connor D, Patey A, Ivers N, et al. A guide to using  
11  
12 591 the Theoretical Domains Framework of behaviour change to investigate implementation  
13  
14 592 problems. *Implementation Science*. 2017;12(1):77.
- 15  
16  
17 593 19. Alexander KE, Brijnath B, Mazza D. Barriers and enablers to delivery of the Healthy  
18  
19 594 Kids Check: an analysis informed by the Theoretical Domains Framework and COM-B  
20  
21 595 model. *Implementation Science*. 2014;9(1):60.
- 22  
23  
24 596 20. Braun V, Clarke V. Using thematic analysis in psychology. *Qualitative Research in*  
25  
26 597 *Psychology*. 2006;3(2):77-101.
- 27  
28  
29 598 21. Marlow L, McBride E, Varnes L, Waller J. Barriers to cervical screening among older  
30  
31 599 women from hard-to-reach groups: a qualitative study in England. *BMC Womens Health*.  
32  
33 600 2019;19(1):38-.
- 34  
35  
36 601 22. Yang H, Li SP, Chen Q, Morgan C. Barriers to cervical cancer screening among rural  
37  
38 602 women in eastern China: a qualitative study. *BMJ Open*. 2019;9(3):e026413.
- 39  
40  
41 603 23. Sultana F, Roeske L, Malloy MJ, McDermott TL, Saville M, Brotherton JML.  
42  
43 604 Implementation of Australia's renewed cervical screening program: Preparedness of general  
44  
45 605 practitioners and nurses. *PLOS ONE*. 2020;15(1):e0228042.
- 46  
47 606 24. Jamal J, MacMillan F, McBride KA. Barriers and Facilitators of Breast Cancer  
48  
49 607 Screening amongst Culturally and Linguistically Diverse Women in South Western Sydney:  
50  
51 608 A Qualitative Explorative Study. *International journal of environmental research and public*  
52  
53 609 *health*. 2021;18(17):9129.
- 54  
55  
56  
57  
58  
59  
60



- 1  
2  
3 610 25. Wentzensen N, Clarke MA, Perkins RB. Impact of COVID-19 on cervical cancer  
4  
5 611 screening: Challenges and opportunities to improving resilience and reduce disparities. *Prev*  
6  
7 612 *Med.* 2021;151:106596-.
- 8  
9  
10 613 26. Department of Health. About the National Bowel Cancer Screening Program, 2021.  
11  
12 614 Available from: [https://www.health.gov.au/initiatives-and-programs/national-bowel-cancer-](https://www.health.gov.au/initiatives-and-programs/national-bowel-cancer-screening-program/about-the-national-bowel-cancer-screening-program)  
13  
14 615 [screening-program/about-the-national-bowel-cancer-screening-program](https://www.health.gov.au/initiatives-and-programs/national-bowel-cancer-screening-program/about-the-national-bowel-cancer-screening-program) [Accessed 02 March  
15  
16 616 2022].
- 17  
18  
19 617 27. Department of Health. About the BreastScreen Australia Program, 2021. Available  
20  
21 618 from: [https://www.health.gov.au/initiatives-and-programs/breastscreen-australia-](https://www.health.gov.au/initiatives-and-programs/breastscreen-australia-program/about-the-breastscreen-australia-program)  
22  
23 619 [program/about-the-breastscreen-australia-program](https://www.health.gov.au/initiatives-and-programs/breastscreen-australia-program/about-the-breastscreen-australia-program) [Accessed 02 March 2022].
- 24  
25  
26 620 28. Cunningham MS, Skrastins E, Fitzpatrick R, Jindal P, Oneko O, Yeates K, et al.  
27  
28 621 Cervical cancer screening and HPV vaccine acceptability among rural and urban women in  
29  
30 622 Kilimanjaro Region, Tanzania. *BMJ Open.* 2015;5(3):e005828.
- 31  
32  
33 623 29. Scanlon B, Brough M, Wyld D, Durham J. Equity across the cancer care continuum  
34  
35 624 for culturally and linguistically diverse migrants living in Australia: a scoping review.  
36  
37 625 *Globalization and Health.* 2021;17(1):87.
- 38  
39  
40 626 30. Kang M, Robards F, Luscombe G, Sanci L, Usherwood T. The relationship between  
41  
42 627 having a regular general practitioner (GP) and the experience of healthcare barriers: a cross-  
43  
44 628 sectional study among young people in NSW, Australia, with oversampling from  
45  
46 629 marginalised groups. *BMC Family Practice.* 2020;21(1):220.
- 47  
48  
49 630 31. Garg P, Ha MT, Eastwood J, Harvey S, Woolfenden S, Murphy E, et al. Explaining  
50  
51 631 culturally and linguistically diverse (CALD) parents' access of healthcare services for  
52  
53 632 developmental surveillance and anticipatory guidance: qualitative findings from the 'Watch  
54  
55 633 Me Grow' study. *BMC Health Services Research.* 2017;17(1):228.
- 56  
57  
58  
59  
60

- 1  
2  
3 634 32. Harrison R, Walton M, Chitkara U, Manias E, Chauhan A, Latanik M, et al. Beyond  
4  
5 635 translation: Engaging with culturally and linguistically diverse consumers. *Health Expect*.  
6  
7 636 2020;23(1):159-68.
- 8  
9  
10 637 33. Haycock J, Grivell N, Redman A, Saini B, Vakulin A, Lack L, et al. Primary care  
11  
12 638 management of chronic insomnia: a qualitative analysis of the attitudes and experiences of  
13  
14 639 Australian general practitioners. *BMC Family Practice*. 2021;22(1):158.
- 15  
16  
17 640 34. Dodd RH, Mac OA, McCaffery KJ. Women's experiences of the renewed National  
18  
19 641 Cervical Screening Program in Australia 12 months following implementation: a qualitative  
20  
21 642 study. *BMJ Open*. 2020;10(7):e039041.
- 22  
23  
24 643 35. Young B, Bedford L, Kendrick D, Vedhara K, Robertson JFR, das Nair R. Factors  
25  
26 644 influencing the decision to attend screening for cancer in the UK: a meta-ethnography of  
27  
28 645 qualitative research. *Journal of Public Health*. 2018;40(2):315-39.
- 29  
30  
31 646 36. Roeske L. Self-collection of HPV samples: A guide for GPs newsGP, 2018. Available  
32  
33 647 from: [https://www1.racgp.org.au/newsgp/clinical/self-collection-of-hpv-samples-a-guide-for-](https://www1.racgp.org.au/newsgp/clinical/self-collection-of-hpv-samples-a-guide-for-gps)  
34  
35 648 [gps](https://www1.racgp.org.au/newsgp/clinical/self-collection-of-hpv-samples-a-guide-for-gps) [Accessed 03 March 2022].
- 36  
37  
38 649 37. Creagh NS, Zammit C, Brotherton JM, Saville M, McDermott T, Nightingale C, et al.  
39  
40 650 Self-collection cervical screening in the renewed National Cervical Screening Program: a  
41  
42 651 qualitative study. *Med J Aust*. 2021;215(8):354-8.
- 43  
44  
45  
46  
47  
48  
49  
50  
51  
52  
53  
54  
55  
56  
57  
58  
59  
60

## Standards for Reporting Qualitative Research (SRQR)\*

<http://www.equator-network.org/reporting-guidelines/srqr/>

Page/line no(s).

### Title and abstract

|                                                                                                                                                                                                                                                              |            |
|--------------------------------------------------------------------------------------------------------------------------------------------------------------------------------------------------------------------------------------------------------------|------------|
| <p><b>Title</b> - Concise description of the nature and topic of the study Identifying the study as qualitative or indicating the approach (e.g., ethnography, grounded theory) or data collection methods (e.g., interview, focus group) is recommended</p> | Page 1     |
| <p><b>Abstract</b> - Summary of key elements of the study using the abstract format of the intended publication; typically includes background, purpose, methods, results, and conclusions</p>                                                               | Pages 2, 3 |

### Introduction

|                                                                                                                                                                     |            |
|---------------------------------------------------------------------------------------------------------------------------------------------------------------------|------------|
| <p><b>Problem formulation</b> - Description and significance of the problem/phenomenon studied; review of relevant theory and empirical work; problem statement</p> | Pages 4, 5 |
| <p><b>Purpose or research question</b> - Purpose of the study and specific objectives or questions</p>                                                              | Page 5     |

### Methods

|                                                                                                                                                                                                                                                                                                                                                                                                             |               |
|-------------------------------------------------------------------------------------------------------------------------------------------------------------------------------------------------------------------------------------------------------------------------------------------------------------------------------------------------------------------------------------------------------------|---------------|
| <p><b>Qualitative approach and research paradigm</b> - Qualitative approach (e.g., ethnography, grounded theory, case study, phenomenology, narrative research) and guiding theory if appropriate; identifying the research paradigm (e.g., postpositivist, constructivist/ interpretivist) is also recommended; rationale**</p>                                                                            | Page 5        |
| <p><b>Researcher characteristics and reflexivity</b> - Researchers' characteristics that may influence the research, including personal attributes, qualifications/experience, relationship with participants, assumptions, and/or presuppositions; potential or actual interaction between researchers' characteristics and the research questions, approach, methods, results, and/or transferability</p> | Pages 5, 6    |
| <p><b>Context</b> - Setting/site and salient contextual factors; rationale**</p>                                                                                                                                                                                                                                                                                                                            | Pages 5, 6    |
| <p><b>Sampling strategy</b> - How and why research participants, documents, or events were selected; criteria for deciding when no further sampling was necessary (e.g., sampling saturation); rationale**</p>                                                                                                                                                                                              | Pages 5, 6, 7 |
| <p><b>Ethical issues pertaining to human subjects</b> - Documentation of approval by an appropriate ethics review board and participant consent, or explanation for lack thereof; other confidentiality and data security issues</p>                                                                                                                                                                        | Pages 6, 26   |
| <p><b>Data collection methods</b> - Types of data collected; details of data collection procedures including (as appropriate) start and stop dates of data collection and analysis, iterative process, triangulation of sources/methods, and modification of procedures in response to evolving study findings; rationale**</p>                                                                             | Pages 6, 7    |

|                       |                                                                                                                                                                                                                                                       |               |
|-----------------------|-------------------------------------------------------------------------------------------------------------------------------------------------------------------------------------------------------------------------------------------------------|---------------|
| 1<br>2<br>3<br>4<br>5 | <b>Data collection instruments and technologies</b> - Description of instruments (e.g., interview guides, questionnaires) and devices (e.g., audio recorders) used for data collection; if/how the instrument(s) changed over the course of the study | Page 6        |
| 6<br>7<br>8           | <b>Units of study</b> - Number and relevant characteristics of participants, documents, or events included in the study; level of participation (could be reported in results)                                                                        | Pages 6, 7, 8 |
| 9<br>10<br>11<br>12   | <b>Data processing</b> - Methods for processing data prior to and during analysis, including transcription, data entry, data management and security, verification of data integrity, data coding, and anonymization/de-identification of excerpts    | Pages 6, 7    |
| 13<br>14<br>15<br>16  | <b>Data analysis</b> - Process by which inferences, themes, etc., were identified and developed, including the researchers involved in data analysis; usually references a specific paradigm or approach; rationale**                                 | Pages 6, 7    |
| 17<br>18<br>19<br>20  | <b>Techniques to enhance trustworthiness</b> - Techniques to enhance trustworthiness and credibility of data analysis (e.g., member checking, audit trail, triangulation); rationale**                                                                | Pages 6, 7    |

## Results/findings

|                      |                                                                                                                                                                                                   |            |
|----------------------|---------------------------------------------------------------------------------------------------------------------------------------------------------------------------------------------------|------------|
| 23<br>24<br>25<br>26 | <b>Synthesis and interpretation</b> - Main findings (e.g., interpretations, inferences, and themes); might include development of a theory or model, or integration with prior research or theory | Pages 7-21 |
| 27<br>28<br>29       | <b>Links to empirical data</b> - Evidence (e.g., quotes, field notes, text excerpts, photographs) to substantiate analytic findings                                                               | Pages 7-21 |

## Discussion

|                                  |                                                                                                                                                                                                                                                                                                                                                                                                             |             |
|----------------------------------|-------------------------------------------------------------------------------------------------------------------------------------------------------------------------------------------------------------------------------------------------------------------------------------------------------------------------------------------------------------------------------------------------------------|-------------|
| 32<br>33<br>34<br>35<br>36<br>37 | <b>Integration with prior work, implications, transferability, and contribution(s) to the field</b> - Short summary of main findings; explanation of how findings and conclusions connect to, support, elaborate on, or challenge conclusions of earlier scholarship; discussion of scope of application/generalizability; identification of unique contribution(s) to scholarship in a discipline or field | Pages 21-26 |
| 38<br>39                         | <b>Limitations</b> - Trustworthiness and limitations of findings                                                                                                                                                                                                                                                                                                                                            | Page 25     |

## Other

|                |                                                                                                                                               |         |
|----------------|-----------------------------------------------------------------------------------------------------------------------------------------------|---------|
| 42<br>43<br>44 | <b>Conflicts of interest</b> - Potential sources of influence or perceived influence on study conduct and conclusions; how these were managed | Page 26 |
| 45<br>46       | <b>Funding</b> - Sources of funding and other support; role of funders in data collection, interpretation, and reporting                      | Page 26 |

\*The authors created the SRQR by searching the literature to identify guidelines, reporting standards, and critical appraisal criteria for qualitative research; reviewing the reference lists of retrieved sources; and contacting experts to gain feedback. The SRQR aims to improve the transparency of all aspects of qualitative research by providing clear standards for reporting qualitative research.

1  
2  
3  
4  
5  
6  
7  
8  
9  
10  
11  
12  
13  
14  
15  
16  
17  
18  
19  
20  
21  
22  
23  
24  
25  
26  
27  
28  
29  
30  
31  
32  
33  
34  
35  
36  
37  
38  
39  
40  
41  
42  
43  
44  
45  
46  
47  
48  
49  
50  
51  
52  
53  
54  
55  
56  
57  
58  
59  
60

\*\*The rationale should briefly discuss the justification for choosing that theory, approach, method, or technique rather than other options available, the assumptions and limitations implicit in those choices, and how those choices influence study conclusions and transferability. As appropriate, the rationale for several items might be discussed together.

**Reference:**

O'Brien BC, Harris IB, Beckman TJ, Reed DA, Cook DA. **Standards for reporting qualitative research: a synthesis of recommendations.** *Academic Medicine*, Vol. 89, No. 9 / Sept 2014  
DOI: 10.1097/ACM.0000000000000388

For peer review only

# BMJ Open

## Barriers and facilitators to cervical cancer screening for women from culturally and linguistically diverse backgrounds; a qualitative study of GPs

|                                 |                                                                                                                                                                                                                                                                                                                                                                                                                    |
|---------------------------------|--------------------------------------------------------------------------------------------------------------------------------------------------------------------------------------------------------------------------------------------------------------------------------------------------------------------------------------------------------------------------------------------------------------------|
| Journal:                        | <i>BMJ Open</i>                                                                                                                                                                                                                                                                                                                                                                                                    |
| Manuscript ID                   | bmjopen-2022-062823.R1                                                                                                                                                                                                                                                                                                                                                                                             |
| Article Type:                   | Original research                                                                                                                                                                                                                                                                                                                                                                                                  |
| Date Submitted by the Author:   | 16-Aug-2022                                                                                                                                                                                                                                                                                                                                                                                                        |
| Complete List of Authors:       | Chandrakumar, Abira; The University of Adelaide, Discipline of General Practice, Adelaide Medical School,; GPEX Ltd<br>Hoon, Elizabeth; The University of Adelaide, Discipline of General Practice, Adelaide Medical School,; The University of Adelaide, School of Public Health<br>Benson, Jill; GPEX Ltd<br>Stocks, Nigel; The University of Adelaide, Discipline of General Practice, Adelaide Medical School, |
| <b>Primary Subject Heading</b>: | General practice / Family practice                                                                                                                                                                                                                                                                                                                                                                                 |
| Secondary Subject Heading:      | Qualitative research                                                                                                                                                                                                                                                                                                                                                                                               |
| Keywords:                       | PREVENTIVE MEDICINE, PRIMARY CARE, QUALITATIVE RESEARCH                                                                                                                                                                                                                                                                                                                                                            |
|                                 |                                                                                                                                                                                                                                                                                                                                                                                                                    |

SCHOLARONE™  
Manuscripts



I, the Submitting Author has the right to grant and does grant on behalf of all authors of the Work (as defined in the below author licence), an exclusive licence and/or a non-exclusive licence for contributions from authors who are: i) UK Crown employees; ii) where BMJ has agreed a CC-BY licence shall apply, and/or iii) in accordance with the terms applicable for US Federal Government officers or employees acting as part of their official duties; on a worldwide, perpetual, irrevocable, royalty-free basis to BMJ Publishing Group Ltd ("BMJ") its licensees and where the relevant Journal is co-owned by BMJ to the co-owners of the Journal, to publish the Work in this journal and any other BMJ products and to exploit all rights, as set out in our [licence](#).

The Submitting Author accepts and understands that any supply made under these terms is made by BMJ to the Submitting Author unless you are acting as an employee on behalf of your employer or a postgraduate student of an affiliated institution which is paying any applicable article publishing charge ("APC") for Open Access articles. Where the Submitting Author wishes to make the Work available on an Open Access basis (and intends to pay the relevant APC), the terms of reuse of such Open Access shall be governed by a Creative Commons licence – details of these licences and which [Creative Commons](#) licence will apply to this Work are set out in our licence referred to above.

Other than as permitted in any relevant BMJ Author's Self Archiving Policies, I confirm this Work has not been accepted for publication elsewhere, is not being considered for publication elsewhere and does not duplicate material already published. I confirm all authors consent to publication of this Work and authorise the granting of this licence.

1  
2  
3  
4 1  
5  
6  
7 2 **Barriers and facilitators to cervical cancer screening for women**  
8  
9  
10 3 **from culturally and linguistically diverse backgrounds; a**  
11  
12  
13 4 **qualitative study of GPs**  
14

15 5 Abira Chandrakumar<sup>1,2\*</sup> Elizabeth Hoon<sup>1,3</sup> Jillian Benson<sup>2</sup> Nigel Stocks<sup>1</sup>  
16  
17  
18 6

- 19  
20 7 1. *Discipline of General Practice, Adelaide Medical School, The University of Adelaide,*  
21  
22 8 *Adelaide, Australia*  
23  
24 9 2. *GPEX Ltd., 132 Greenhill Road, Unley, South Australia, Australia*  
25  
26  
27 10 3. *School of Public Health, The University of Adelaide, Adelaide, Australia*  
28  
29  
30 11  
31  
32 12

33  
34 13 **Correspondence:** Abira Chandrakumar, *Discipline of General Practice, Adelaide Medical*  
35  
36 14 *School, The University of Adelaide, Adelaide, Australia*, Email:  
37  
38 15 [abira.chandrakumar@adelaide.edu.au](mailto:abira.chandrakumar@adelaide.edu.au)  
39  
40  
41 16  
42  
43 17  
44

45 18 **Word count (excluding title page, abstract, references, figures and tables):** 5079  
46

47 19 **Key words:** cervical cancer screening; barriers; facilitators; GPs  
48  
49  
50 20  
51  
52  
53  
54  
55  
56  
57  
58  
59  
60



1  
2  
3 21 **ABSTRACT**  
4  
5

6 22 **Objective** To explore general practitioners' (GPs) perspectives on the barriers and facilitators  
7  
8 23 to cervical cancer screening (CCS) for women from culturally and linguistically diverse  
9  
10 24 (CALD) backgrounds.  
11  
12  
13

14 25  
15  
16 26 **Design** Qualitative descriptive study involving semi-structured interviews, with interview guide  
17  
18 27 informed by the Theoretical Domains Framework.  
19  
20  
21

22 28  
23  
24  
25 29 **Setting** Adelaide, South Australia.  
26  
27  
28

29 30  
30  
31 31 **Participants** Twelve GPs with experience in providing CCS to women from CALD  
32  
33 32 backgrounds participated.  
34  
35

36 33  
37  
38  
39 34 **Results** Four main themes emerged: 'importance of clinician-patient relationship', 'patients'  
40  
41 35 cultural understanding regarding health care and CCS', 'communication and language' and  
42  
43 36 'health-system related'. Each theme had several subthemes. GPs' professional relationship  
44  
45 37 with their patients and repeated advice from other clinicians, together with the provision of  
46  
47 38 opportunistic CCS, were described as facilitators, and encompassed the theme of 'importance  
48  
49 39 of clinician-patient relationship'. This theme also raised the possibility of self-collection  
50  
51 40 human papilloma virus (HPV) tests. Lack of awareness and knowledge, lower priority for  
52  
53 41 cancer screening, and patients' individual circumstances contributed to the theme of  
54  
55 42 'patients' cultural understanding regarding health care and CCS', and often acted as barriers  
56  
57 43 to CCS. 'Communication and language' consisted of language difficulties, interpreter use,  
58  
59  
60

1  
2  
3 44 and use of appropriate resources. Language difficulties was a barrier to the provision of CCS,  
4  
5 45 and GPs used interpreters and written handouts to help overcome this. The theme of ‘health-  
6  
7 46 system related’ involved the increased time needed for CCS consults for CALD women,  
8  
9 47 access to appointments, funding, health promotion and effective use of practice management  
10  
11 48 software.  
12  
13  
14  
15  
16  
17

18 50 **Conclusions** This study highlights that multiple, inter-related barriers and facilitators  
19  
20 51 influence CALD women’s engagement with CCS, and that GPs needed to manage all of these  
21  
22 52 factors in order to encourage CCS participation. More efforts are needed to address the  
23  
24 53 barriers to ensure that GPs have access to appropriate resources, and CALD patients have  
25  
26 54 access to GPs they trust.  
27  
28  
29

### 30 55 **STRENGTHS AND LIMITATIONS**

- 32 56 - The use of qualitative methodology allowed for in-depth exploration of GPs’  
33  
34 57 experiences in providing cervical cancer screening to women from CALD  
35  
36 58 backgrounds
- 37  
38 59 - The use of the Theoretical Domains Framework in the interview guide and data  
39  
40 60 analysis, provided an evidence-based approach for study interpretation
- 41  
42 61 - GPs who participated in our study had a general interest in improving cervical cancer  
43  
44 62 screening participation for CALD women, so their experiences may not be reflective  
45  
46 63 of all GPs in Australia
- 47  
48 64 - Participants were drawn from metropolitan South Australia only, and GPs from other  
49  
50 65 areas in Australia, including rural areas, may add further to the study  
51  
52  
53  
54  
55  
56  
57  
58  
59  
60

## 67 **INTRODUCTION**

68 Worldwide, cervical cancer is the fourth most common cancer in women; in both incidence  
69 and mortality, with the highest burden in countries without cervical screening programs<sup>1, 2</sup>.

70 Cervical cancer should largely be preventable, through human papilloma virus (HPV)  
71 immunisation and effective screening programs<sup>2</sup>. In Australia, the renewed National Cervical  
72 Screening Program (rNCSP) has been in place since 1 December 2017, recommending  
73 asymptomatic women aged 25-74 years undertake HPV screening tests every five years,  
74 replacing two-yearly Pap smears<sup>2-4</sup>.

75 However, participation in cervical cancer screening (CCS) remains low, with the Australian  
76 Institute of Health and Welfare reporting that during 2018–2019, only 46% of eligible  
77 women had a screening HPV test as part of the rNCSP<sup>2</sup>. It is well-established that a  
78 significant risk factor for the development of cervical cancer is under-screening or never  
79 being screened<sup>2, 3</sup>. Therefore, less than half of eligible women participating in CCS, in a  
80 country with a well-developed screening program, needs to be addressed, in particular as  
81 Australia plans to eliminate cervical cancer by 2035<sup>5</sup>.

82 Current literature suggests that inequalities in screening persist with lower rates of CCS in  
83 women from culturally and linguistically diverse (CALD) backgrounds<sup>6, 7</sup>. Australia is a  
84 multicultural nation, with growing migrant populations, and this calls to strengthen our  
85 healthcare access and outcomes for these populations<sup>8</sup>. Addressing such inequalities will be  
86 key to Australia's success in eliminating cervical cancer.

87 Research has been performed in Australia<sup>6, 7, 9</sup> and internationally<sup>10-14</sup> exploring CALD  
88 patients' perspectives on the barriers and facilitators to CCS. Patient barriers have included  
89 poor health literacy, cultural beliefs and stigma, and English proficiency<sup>6, 10, 12</sup>. Comparably,  
90 linguistic strategies, and increasing patients' awareness surrounding CCS are described as

1  
2  
3 91 facilitators<sup>12,13</sup>. Although international studies have explored health care providers' (HCP)  
4  
5 92 perspectives on CCS; reporting barriers and facilitators relating to knowledge,  
6  
7  
8 93 communication, and access to healthcare services<sup>15-17</sup>, very little is known about Australian  
9  
10 94 HCP perspectives on this issue. To the best of the authors' knowledge, Australian general  
11  
12 95 practitioners' (GPs) perspectives on barriers and facilitators to CCS in CALD patients have  
13  
14  
15 96 not been documented.

16  
17 97 There is growing recognition that delivering healthcare involves complex underlying  
18  
19 98 processes within specific contexts<sup>18,19</sup>. In order to effectively bring about change in  
20  
21  
22 99 healthcare, we need to theoretically understand the influences on professional behaviours, so  
23  
24 100 that they are considered in interventions aimed at change<sup>18-20</sup>. The Theoretical Domains  
25  
26 101 Framework (TDF) is a conceptual, validated framework that has synthesised 33 behavioural  
27  
28 102 theories forming 14 domains, and is a useful tool to support researchers in understanding the  
29  
30 103 environmental, social, and cognitive influences on behaviour<sup>21</sup>. It has been widely applied  
31  
32 104 across healthcare-related research focussed on changing clinical and professional behaviours,  
33  
34 105 including understanding barriers and facilitators to behaviours related to healthcare  
35  
36 106 outcomes<sup>21-23</sup>.

37  
38  
39  
40  
41 107 Therefore, using TDF, this study aims to explore GPs' perspectives on the barriers and  
42  
43 108 facilitators to CCS for women from CALD backgrounds. By discovering the views of those  
44  
45 109 who primarily provide CCS in the community, we aim to gain a deeper understanding of the  
46  
47 110 barriers faced in every-day clinical practice, and insights into factors that can be used to  
48  
49 111 increase participation in CCS for these women.

## 52 53 112 **METHODS**

### 54 55 56 113 **Study design and setting**

1  
2  
3 114 A qualitative descriptive study involving in-depth semi-structured interviews was conducted  
4  
5 115 in Adelaide, South Australia. Semi-structured interviews enabled exploration of participants'  
6  
7 116 experiences. The interviews were undertaken by the lead author, AC; a GP Registrar.  
8  
9

### 10 117 **Recruitment**

11  
12  
13 118 Study participants were recruited through purposive sampling. General practices located in  
14  
15 119 communities with migrant populations, registered with GPEx (South Australia's Regional  
16  
17 120 Training Organisation for General Practice Registrars), and/or professional contacts of  
18  
19 121 Discipline of General Practice at The University of Adelaide, were identified, and GPs with  
20  
21 122 experience in providing cervical screening tests (CSTs) to women from CALD backgrounds  
22  
23 123 were invited to participate in interviews through email, telephone, or snowballing methods.  
24  
25 124 GPs were reimbursed with a \$AUD100 gift card for their time.  
26  
27  
28  
29

### 30 125 **Data collection**

31  
32  
33 126 A semi-structured interview guide informed by TDF<sup>21</sup> was developed by AC and EH, who  
34  
35 127 has extensive experience in qualitative methodologies. The TDF provided a method to  
36  
37 128 understand GPs' and patients' behaviours related to CCS theoretically<sup>18</sup>. The interview guide  
38  
39 129 covered questions regarding GPs' experiences in working with women from CALD  
40  
41 130 backgrounds, in particular relating to CCS, and covered TDF domains including knowledge,  
42  
43 131 skills, and social/ professional role and identity. Two pilot interviews were undertaken to  
44  
45 132 develop AC's interview skills, and minor revisions to the interview guide were made based  
46  
47 133 on feedback. Data from the pilot interviews were not included in the final analysis.  
48  
49  
50  
51

52 134 A total of twelve interviews were conducted between May and September 2021. Ten were  
53  
54 135 conducted via telephone and two via video teleconference (using Zoom application). The use  
55  
56 136 of remote technology improved access for participants. Interviews lasted between 19 and 35  
57  
58  
59  
60

1  
2  
3 137 minutes. Written informed consent was received from all participants prior to interviews.  
4

5 138 Field notes were taken by AC during each interview.  
6  
7

### 8 139 **Data analysis** 9

10  
11 140 All but one of the interviews were digitally audio-recorded and transcribed verbatim. One  
12  
13 141 participant did not consent to audio-recording, and comprehensive written notes were instead  
14  
15 142 taken with their consent. AC listened to all audio-recordings in full and cross-checked them  
16  
17 143 with the transcripts for accuracy. Any identifying information was removed from the  
18  
19 144 transcripts.  
20  
21  
22

23 145 Braun & Clarke's six-phase framework guided thematic analysis<sup>24</sup>. Hard copies of transcripts  
24  
25 146 were reviewed by AC prior to coding, producing a brief summary outlining the key findings  
26  
27 147 within each transcript. Data were managed using QSR N-Vivo software. Codes were  
28  
29 148 generated inductively. Initial codes were generated by independent coding of three transcripts  
30  
31 149 by AC, EH and JB, and codes agreed upon through discussion. The subsequent transcripts  
32  
33 150 were coded by AC, and discussed regularly with EH, JB and NS for refinement. The final  
34  
35 151 codes were then structured into themes and sub-themes. In the final phase of analysis, this  
36  
37 152 inductive approach was followed by reflexive consideration of the potential fit between the  
38  
39 153 themes generated and the TDF domains. This approach supported the interpretation of the  
40  
41 154 data, and fits with Braun and Clarke's overall analysis framework<sup>24</sup>. Two further interviews  
42  
43 155 were then conducted to supplement data from the first ten interviews, to confirm findings and  
44  
45 156 attain data saturation.  
46  
47  
48  
49  
50

### 51 157 **Patient and public involvement** 52

53  
54 158 Our study focussed on GPs' perspectives on the barriers and facilitators to CCS for women  
55  
56 159 from CALD backgrounds, and patient and the public were not involved at this stage.  
57  
58  
59  
60

161 **RESULTS**162 **Participant characteristics**

163 The characteristics of the 12 participants are in Table 1. 92% of the GPs were female. 8 GPs  
 164 (67%) used another language for consulting (in addition to English).

165 **TABLE 1: Characteristics of the participants**

| Characteristics                          | GP Participants ( <i>n</i> =12) |
|------------------------------------------|---------------------------------|
| Age (years)                              |                                 |
| ≤ 35                                     | 2                               |
| 36 – 54                                  | 9                               |
| ≥ 55                                     | 1                               |
| Sex                                      |                                 |
| Female                                   | 11                              |
| Male                                     | 1                               |
| Length of practice as GP (years)         |                                 |
| <5                                       | 3                               |
| 5 – 15                                   | 4                               |
| >15                                      | 5                               |
| Clinical workload as GP per week (hours) |                                 |
| 0 – 15                                   | 2                               |
| 16 – 30                                  | 5                               |
| >30                                      | 5                               |

| Languages used for consulting other than English |   |
|--------------------------------------------------|---|
| Nil (other than English)                         | 4 |
| Bengali                                          | 3 |
| Mandarin/ Chinese                                | 2 |
| Urdu                                             | 2 |
| Vietnamese                                       | 1 |

166

167 **Themes**

168 There are four major themes reported based on our thematic analysis. Within each theme,  
 169 several sub-themes were identified, and supported by quotations from the interviews. These  
 170 are described below. Themes and sub-themes are also summarised in Table 2.

171 **TABLE 2: Themes and sub-themes**

| Themes                                                                                           | Sub-themes                                                                                                                                                                                                                           |
|--------------------------------------------------------------------------------------------------|--------------------------------------------------------------------------------------------------------------------------------------------------------------------------------------------------------------------------------------|
| <ul style="list-style-type: none"> <li>• Importance of clinician-patient relationship</li> </ul> | <ul style="list-style-type: none"> <li>• GPs' professional relationship with their patients</li> <li>• Providing opportunistic CSTs</li> <li>• Other clinician-patient relationships</li> <li>• Self-collection HPV tests</li> </ul> |



|                                                                                                                    |                                                                                                                                                                                                                                                                                                                                                                                                                                                                                                                                                         |
|--------------------------------------------------------------------------------------------------------------------|---------------------------------------------------------------------------------------------------------------------------------------------------------------------------------------------------------------------------------------------------------------------------------------------------------------------------------------------------------------------------------------------------------------------------------------------------------------------------------------------------------------------------------------------------------|
| <ul style="list-style-type: none"> <li>• Patients' cultural understanding regarding health care and CCS</li> </ul> | <ul style="list-style-type: none"> <li>• Lack of awareness and knowledge</li> <li>• Lower priority for cancer screening <ul style="list-style-type: none"> <li>○ Not on patients' agenda</li> <li>○ Patients' subjective beliefs and perceptions of low risk</li> <li>○ COVID-19 pandemic</li> </ul> </li> <li>• Importance of patients' individual circumstances <ul style="list-style-type: none"> <li>○ Patient concerns surrounding physical examination</li> <li>○ Influence of relatives</li> <li>○ Previous sexual trauma</li> </ul> </li> </ul> |
| <ul style="list-style-type: none"> <li>• Communication and language</li> </ul>                                     | <ul style="list-style-type: none"> <li>• Language difficulties</li> <li>• Interpreter use</li> <li>• Use of appropriate resources</li> </ul>                                                                                                                                                                                                                                                                                                                                                                                                            |
| <ul style="list-style-type: none"> <li>• Health-system related</li> </ul>                                          | <ul style="list-style-type: none"> <li>• Increased time needed</li> <li>• Access to appointments</li> <li>• Funding</li> <li>• Health promotion</li> <li>• Use of practice management system</li> </ul>                                                                                                                                                                                                                                                                                                                                                 |

1  
2  
3 173 **Theme 1: Importance of clinician-patient relationship**  
4

5 174 **1.1 GPs' professional relationship with their patients**  
6  
7

8 175 GPs identified several helpful factors in providing CSTs to women from CALD backgrounds.  
9

10 176 These included their professional experience providing CSTs, length of experience in  
11  
12 177 working with CALD women, and being a female GP.

13  
14  
15  
16 178 *“I see a lot of Vietnamese patients...[but] I see everybody else, not just Vietnamese.*

17  
18 179 *So... Thai, Israel, Iran, African, everybody” (GP8).*  
19

20  
21 180 Being a male GP was identified as a barrier, as patients were less likely to see a male GP for  
22  
23 181 CSTs.

24  
25  
26 182 *“My experience is that as a male doctor, we have to be very clear about how... we*  
27  
28 183 *approach cervical screening” (GP4).*  
29

30  
31 184 A continuing doctor-patient relationship was frequently a facilitator.  
32  
33

34 185 *“To have a long-term GP or someone you're familiar with is really helpful... So, they*  
35  
36 186 *will let you do what you think is good for them or they will bring it up because they're*  
37  
38 187 *comfortable” (GP8).*  
39  
40

41  
42 188 GPs also described the importance of building rapport with their patient to facilitate screening  
43  
44 189 discussions.

45  
46  
47 190 *“I build rapport and build a relationship with the patient first. So that then they trust*

48  
49 191 *me more... about some of these more sensitive issues and exams, and are more likely*

50  
51 192 *to agree to it later down the track” (GP7).*  
52  
53

54  
55 193

56  
57  
58 194 **1.2 Providing opportunistic CSTs**  
59  
60

1  
2  
3 195 Being opportunistic was important. This included initiating the first discussion regarding  
4  
5 196 CCS, and seeking out the opportunity during other care provision, such as during preparation  
6  
7  
8 197 of chronic disease GP management plans, peri-partum consults, and consults surrounding  
9  
10 198 sexual health.

11  
12  
13 199 *“I think just being opportunistic... for the practitioner to be aware to offer these*  
14  
15 200 *primary health prevention measures... to incorporate the cervical screening... and*  
16  
17 201 *offer it all the time”* (GP5)

18  
19  
20 202 GPs described that they needed to be aware of the lower screening rates in women from  
21  
22 203 CALD backgrounds, and take the initiative to raise CCS with them.

23  
24  
25 204 *“Being conscious of the fact that often people of these backgrounds are under-*  
26  
27 205 *screened so that then we can make up for it by putting in that special effort”* (GP7)

28  
29  
30 206

### 31 32 33 207 **1.3 Other clinician-patient relationships**

34  
35  
36 208 Repeated advice regarding CCS from multiple health care providers, including practice  
37  
38 209 nurses and hospital midwives, was described as a facilitator.

39  
40  
41 210

42  
43 211 *“One thing that has really helped, if there's multiple health care providers telling*  
44  
45 212 *them the same things”* (GP9).

46  
47  
48 213

### 49 50 51 214 **1.4 Self-collection HPV tests**

52  
53  
54 215 Most participants were aware of the availability of self-collection HPV tests under the rNCSP  
55  
56 216 for under-screened women and viewed the tests positively, describing that *“it's a good*  
57  
58 217 *opportunity to screen the under-screened patient”* (GP11).

1  
2  
3 218 However, GPs also identified several challenges to self-collection tests, and many of these  
4  
5 219 relate to the already identified barriers in our findings.  
6  
7

8  
9 220

## 10 11 221 **Theme 2: Patients' cultural understanding regarding health care and CCS**

### 12 13 14 222 **2.1 Lack of awareness and knowledge**

15  
16 223 Lack of awareness and access to reliable information regarding the rNCSP and cervical  
17  
18 224 cancer were significant barriers. GPs reported that CSTs were a new concept to some  
19  
20 225 patients, whilst others may have heard of CSTs (or pap smears), but had limited knowledge  
21  
22 226 about their purpose, the procedure involved, or about cervical cancer.  
23

24  
25  
26 227 *"If they don't understand how important it is, they're just not going to accept it"*

27  
28  
29 228 (GP9).

30  
31  
32 229 It was reported that some patients' knowledge gap was universal for all screening programs  
33  
34 230 offered in Australia.

35  
36 231 *"It's not just about [CCS]. It was about bowel cancer screening... mammograms as*  
37  
38 232 *well"* (GP9).

39  
40  
41 233 Participants also reflected on the differences in participation between different cultural  
42  
43 234 groups.

44  
45  
46 235 *"...[Patients from] Cambodia, who have equivalent programs there... had raised it*  
47  
48 236 *with me, and asked when they're going to be due here"* (GP7).

49  
50  
51 237 Conversely, migration from countries without CCS deepened the lack of awareness.

52  
53  
54 238 *"Sometimes it's just, sort of, lack of exposure to this knowledge... they've recently*  
55  
56 239 *come here... back in their countries, this doesn't exist"* (GP9).

1  
2  
3 240  
4  
56 241 **2.2 Lower priority for cancer screening**8  
9 242 **2.2.1 Not on patients' agenda**

11  
12 243 GPs described that women from CALD backgrounds often viewed CCS with less importance  
13  
14 244 and priority, and it was commonly not on a patient's agenda when presenting to her GP.

16  
17 245 Participants identified that multiple factors were often involved in preventive care taking “a  
18  
19 246 *bit of a sideline*” (GP7). Patients from CALD backgrounds often presented with acute  
20  
21 247 medical issues, which may be more complex, requiring more time within the consult.

23  
24  
25 248 *“You've got so much other stuff to get through and everything's taking a bit longer*  
26  
27 249 *generally. I've also got quite a few women from refugee backgrounds who, I guess,*  
28  
29 250 *are going through a lot of difficult things and sometimes find it hard just to get to the*  
30  
31 251 *doctor and make it to appointments and when they come, [they] have quite a few*  
32  
33 252 *pressing issues that need to be addressed. And so, a lot of that preventative stuff can*  
34  
35 253 *get lost in the background a bit unfortunately”* (GP7).  
36  
37  
38

39 254  
40  
4142 255 **2.2.2 Patients' subjective beliefs and perceptions of low risk**

44  
45 256 GPs described that some patients had pre-determined beliefs, and false perceptions of low  
46  
47 257 risk, regarding CCS. This included beliefs that they would not contract HPV as a result of the  
48  
49 258 same lifetime sexual partner, with some patients having difficulty acknowledging “*how they*  
50  
51 259 *got [HPV]*” (GP6).

52  
53  
54  
55 260 GPs also identified that some patients believed their older age lowered their risk of cervical  
56  
57 261 cancer.  
58  
59  
60

1  
2  
3 262 *“Ones that are like over 60... over 65... or that they have no longer have a sexual*  
4  
5 263 *partner. And then mistakenly think that, well, because they [are] not sexually*  
6  
7 264 *active... they don't have to do anything” (GP8).*  
8  
9

10 265

### 13 266 **2.2.3 COVID-19 pandemic**

16 267 The COVID-19 pandemic was also described to have impacted CCS participation; across  
17  
18 268 women from all backgrounds.

21 269 *“During the [COVID-19] pandemic... we've seen a marked decrease in the number of*  
22  
23 270 *people presenting for just primary screening” (GP5).*  
24  
25

26 271

## 28 272 **2.3 Importance of patients' individual circumstances**

### 31 273 **2.3.1 Patient concerns surrounding physical examination**

34 274 A common report was patients' reluctance and embarrassment surrounding cervical  
35  
36 275 examinations, as they involve speculums and can be intrusive.

39 276 *“I find that... women from particular cultures... could be quite ashamed to get*  
40  
41 277 *exposed... does make the actual procedure sometimes a little bit difficult” (GP12).*  
42  
43

44 278 Patients were less comfortable with CSTs when children were present, and it was difficult for  
45  
46 279 GPs to manage supervising the children and performing the examination.

50 280 *“I do think sometimes young woman with really tiny children, it could be a real*  
51  
52 281 *barrier to get the time. They never get a chance to come in without their kids”*  
53  
54 282 *(GP1).*  
55  
56

### 57 283 **2.3.2 Influence of relatives**

58  
59  
60

1  
2  
3 284 GPs noted that if a patient's relatives were not participating, this reduced the patient's own  
4  
5 285 willingness to engage with CCS.

6  
7  
8 286 *"There are some beliefs and they've reached a certain age and like they just outright*  
9  
10 287 *say "none of my sisters and mothers have had it and they're fine" (GP9).*

11  
12  
13 288 However, relatives can also have a positive influence, with some GPs describing that the  
14  
15 289 presence of a support person, in particular daughters bringing their mothers, had improved  
16  
17 290 uptake.

18  
19  
20  
21 291 *"Another thing I've found helpful is, I've had a few patients from different cultural*  
22  
23 292 *backgrounds where the daughter and the mom have come together for their pap*  
24  
25 293 *smears, and the daughter... interpreted for the mom... the daughter has encouraged*  
26  
27 294 *the mum to come along" (GP7).*

### 28 294 29 30 31 295 **2.3.3 Previous sexual trauma**

32  
33  
34 296 A history of female genital mutilation was raised by some GPs as negatively affecting CCS  
35  
36 297 participation, with an emphasis on the need for GPs to be more sensitive and respectful about  
37  
38 298 this issue.

39  
40  
41 299 *"Women that have had genital mutilation...exploring... how comfortable they are and*  
42  
43 300 *the sort of speculum that you might choose... a bit more gently you might go about it"*  
44  
45 301 *(GP10).*

46  
47  
48  
49 302 Similarly, cervical examinations can be distressing for patients with a history of sexual abuse.

50  
51  
52 303 *"I've found much more barriers when women have been in sexual abuse" (GP1).*

53  
54  
55 304

### 56 57 305 **Theme 3: Communication and language**

### 3.1 Language difficulties

Most participants described challenges in promoting CCS when speaking a different language to their patient, or when patients were not fluent in English.

*“Its a difficulty explaining [CSTs] in their own terms... what exactly this means”*  
(GP12).

Using simple words helped with communication, as did the use of anatomy models and visual aids.

*“[I] find this a new concept and [women from CALD backgrounds] have absolutely no idea... I say this is a cancer screening... I may show a picture”* (GP4).

*“I really show them the speculum, probably tell them that there are smaller ones if they were worried about internal exams, actually showing the brush and let them have a feel of the brush”* (GP5).

### 3.2 Interpreter use

Language barriers were often overcome by using interpreters. GPs valued effective communication, with one GP reflecting that CCS is *“something that good communication is absolutely crucial for, to make sure you're getting proper consent and the patient is really comfortable”* (GP7).

Easy access to telephone interpreters was important, but challenges included inconvenience, increased time, miscommunication errors, and sensitivities in using an interpreter for a gynaecological examination.

*“In an ideal circumstance, you'd have a telephone interpreter... that take 5 minutes to line up at best... maybe it's something that you can plan for another day”* (GP2).



328 Another GP shared that using family members as interpreters provides variable results.

329 *“A relative could be good or they could be terrible... could talk over with them*

330 *afterwards and say this is what it’s about” (GP1).*

### 331 **3.3. Use of appropriate resources**

332 GPs used written handouts, and highlighted the value of providing reliable information to  
333 patients in their own language. Some GPs were aware of where to access such information,  
334 whilst others expressed the need for easier access to these resources.

335 *“Something that could be useful would be to look into if there’s pamphlets or*  
336 *information sheets in various languages that could be given to patients” (GP7).*

337 Waiting room resources, such as posters and pamphlets, were mentioned as impacting patient  
338 education and awareness. Additionally, written resources regarding the rNCSP was raised as  
339 important in the provision of consistent information.

340 *“It can be confusing for the patients about how it’s swapped over [to rNCSP], but*  
341 *probably some kind of handout you can give for that” (GP1).*

342 Similarly, provision of information through videos and radio communication in different  
343 languages was suggested to supplement the written resources.

344 *“Some videos on the website in [patients’] own language would be a good decision...*  
345 *and I know that there is some like radios that are given in like different languages just for*  
346 *this... I think [patients’] acceptance would be better that its coming from their population”*  
347 *(GP3).*

348

## 349 **Theme 4: Health-system related**

### 350 **4.1 Increased time needed**

1  
2  
3 351 Allocating sufficient time was key to improving uptake, particularly in the presence of  
4  
5 352 language barriers and interpreters. GPs employed strategies such as longer appointments, or  
6  
7  
8 353 discussions over multiple appointments.

9  
10 354 *“You have to warn them... bring them back again and see if they’ve got any question,*  
11  
12  
13 355 *so maybe third time finally you’d do [the CST]” (GP1).*

14  
15 356 GPs expressed concerns regarding non-attendance when patients are asked to re-schedule  
16  
17 357 appointments.

18  
19  
20 358 *“I think that anything where you raise it and then try and think that they’ll come*  
21  
22  
23 359 *back, you lose... your opportunity... they don’t return. So, one of the advantages is if*  
24  
25 360 *you are comfortable you can do it quite quickly, then you get it all done and dusted in*  
26  
27 361 *that consultation” (GP10).*

28  
29  
30 362 GPs also identified the need for investing more time in explaining and performing CSTs.

31  
32  
33 363 *“I have to explain [CSTs] before I go ahead. So that’s the challenge... Rather than*  
34  
35 364 *the [non-CALD] population, they would be expecting, they know what is going to*  
36  
37 365 *happen and how we interpret” (GP3).*

38  
39  
40  
41 366 However, GPs described time-pressure challenges when spending more time on one  
42  
43 367 particular health issue, or when attempting to schedule multiple aspects of care into one  
44  
45 368 consultation.

46  
47  
48 369 *“Now there’s even the cervical cancer vaccine that needs to be brought up as well. So,*  
49  
50 370 *it’s a lot to talk about.” (GP8).*

51  
52  
53 371

54  
55 372 **4.2 Access to appointments**

1  
2  
3 373 Improving access to appointments can improve a patient's participation in screening. Some  
4  
5 374 GPs suggested the use of women-only or CCS-specific clinics.

6  
7  
8 375 *"We can even run like a cervical screening clinic, as a separate one... where it could*  
9  
10 376 *be like women presenting and it could be a more welcoming environment for the*  
11  
12 377 *women."* (GP12).

13  
14  
15  
16 378 Additionally, GPs reflected upon the possibility of easily accessible appointment times to  
17  
18 379 encourage wider participation.

19  
20  
21 380 *"It's interesting to see how many women come on a Saturday morning for cervical*  
22  
23 381 *screening... I'm sure that might be the same for CALD backgrounds"* (GP10).

24  
25  
26 382 Some GPs also described transport access issues, and the need for some patients to rely on  
27  
28 383 family members to attend appointments.

29  
30  
31 384 *"Maybe accessing the service could be a problem for them. Maybe they are*  
32  
33 385 *dependent on their husband or somebody else to make an appointment for them and*  
34  
35 386 *bring them for the test."* (GP12).

### 36 37 38 39 387 **4.3 Funding**

40  
41  
42 388 Issues surrounding Medicare eligibility and costs of CCS were raised as barriers, particularly  
43  
44 389 when coupled with the lack of perceived necessity.

45  
46  
47 390 *"If they don't hold a Medicare [card] and they have got some sort of a private*  
48  
49 391 *insurance... do they think they might have to pay for some tests? They perceive this as*  
50  
51 392 *an unimportant task"* (GP9).

52  
53  
54  
55 393 A GP reflected that working in a bulk-billing clinic acted as a facilitator for these patients.  
56  
57  
58  
59  
60

1  
2  
3 394 *“For screening, if there's nothing that's wrong with [women from CALD*  
4  
5 395 *backgrounds], I don't think that they will pay... I don't think that I will be as*  
6  
7 396 *successful, as I am, running the screening program, if I charge this woman” (GP8).*  
8  
9

10 397 However, the GP also mentioned that more funding should be allocated to facilitating CCS,  
11  
12  
13 398 in particular for under-screened populations.  
14

15  
16 399 *“I think, for us, the funding would be a big thing. To give us more time so we can*  
17  
18 400 *educate” (GP8).*  
19

#### 20 21 401 **4.4 Health promotion**

22  
23  
24 402 GPs advocated for culturally-sensitive public health campaigns and health promotional  
25  
26 403 materials, particularly in different languages, to raise awareness. Ideas offered included  
27  
28 404 Government initiatives and campaigns, and use of social media, radio services, and  
29  
30 405 television.  
31  
32

33  
34 406 *“Maybe some more public health campaign so that people have already been*  
35  
36 407 *introduced to the concept [of CSTs] outside of general practice” (GP2).*  
37  
38

#### 39 408 **4.5 Use of practice management system**

40  
41  
42 409 An effective recall and reminder system, incorporating telephone calls, text messages and  
43  
44 410 sending letters to patients, was considered a facilitator. GPs reflected on the importance of  
45  
46 411 placing patients on the reminder system to ensure follow up, and engaged their practice  
47  
48 412 nurses and receptionists to assist with recalls.  
49  
50

51  
52 413 *“We actually spend a lot of manpower... to draw out the recalls and actively calling*  
53  
54 414 *people. Sometimes they don't respond to a message, we call them, we keep trying and*  
55  
56 415 *then we send a letter” (GP8).*  
57  
58  
59  
60

1  
2  
3 416 GPs mentioned that reminders were more effective when they were sent in patients' own  
4  
5 417 languages.

6  
7  
8 418 *"I've got a template letter for [language] ...and now I have a text message in*  
9  
10 419 *[language] ...it doesn't need to be long... but this is their language"* (GP8).

11  
12  
13 420 Additionally, GPs stated that prompts during consultations, and when booking appointments,  
14  
15 421 can also increase patient participation by initiating the discussion.

16  
17  
18 422

19  
20  
21 423 **DISCUSSION**

22  
23  
24 424 The study findings provide in-depth insight into GPs' perspectives about the barriers and  
25  
26 425 facilitators to CCS for an under-screened population group - women from CALD  
27  
28 426 backgrounds. GPs identified several barriers at the individual and organisational levels; often  
29  
30 427 co-existing to challenge the provision of CCS in these women. Similarly, GPs reflected on  
31  
32 428 several personal facilitators that encouraged and increased CCS.

33  
34  
35  
36 429 The TDF was used to further interpret our study's themes. We used the TDF domains of  
37  
38 430 knowledge, skills, social/professional role and identity, beliefs about consequences,  
39  
40 431 environmental context and resources, and social influences, within our interpretation. As our  
41  
42 432 study demonstrates the inter-relationship of the barriers and facilitators, our four prominent  
43  
44 433 themes transect multiple domains of the TDF. To highlight this, we have not described our  
45  
46 434 findings under domain headings as discrete constructs, but rather refer to these domains  
47  
48 435 (*italics used to signal this*) in the following discussion.

49  
50  
51  
52  
53 436 Our study found that lack of awareness or insufficient *knowledge* regarding CCS continues to  
54  
55 437 hinder screening participation in CALD women, consistent with previous literature<sup>13,25-27</sup>.

56  
57  
58 438 Knowledge gaps in the process and importance of screening often reflected low health  
59  
60 439 literacy and lack of exposure to CCS in patients' countries of birth (*environmental context*

1  
2  
3 440 *and resources*). GPs mentioned that patients were more proactive if they migrated from  
4  
5 441 countries where CCS is offered as primary screening. GPs also reflected that some patients'  
6  
7 442 lack of knowledge translated to other primary screening programs, such as breast cancer and  
8  
9 443 bowel cancer screening. This is not surprising given that CALD women can be unfamiliar  
10  
11 444 with preventive health services<sup>12,15</sup> (*beliefs about consequences*), indicating that widespread  
12  
13 445 interventions are required to improve CALD patients' cancer screening participation<sup>28</sup>.  
14  
15 446 Patients who did not view cancer screening, specifically CCS, with high importance, or  
16  
17 447 patients who perceived themselves to be at low risk of cervical cancer, were less likely to  
18  
19 448 present for screening (*knowledge, beliefs about consequences*). GPs identified that CALD  
20  
21 449 patients' needs can be more complex, and cancer screening was often not on their agenda.  
22  
23 450 Additionally, the COVID-19 pandemic, which has caused significant reductions in preventive  
24  
25 451 healthcare, including CCS<sup>29</sup>, was echoed by our GPs as having a negative impact on CCS  
26  
27 452 participation rate (*environmental context and resources*).  
28  
29  
30  
31  
32  
33 453 It was highlighted that opportunistically offering CCS to women with low knowledge,  
34  
35 454 awareness and priority, was a significant facilitator, and at times, a necessity, in improving  
36  
37 455 uptake (*skills, social/ professional role and identity*). GPs demonstrated variable approaches  
38  
39 456 to this, with some offering it as part of chronic disease care, and others during consults  
40  
41 457 surrounding sexual health. Although other studies have also highlighted that CALD women  
42  
43 458 tend to undertake CCS when offered opportunistically<sup>16</sup>, this was a prominent idea amongst  
44  
45 459 our participants. As CCS in Australia is commonly performed by GPs, this allows for  
46  
47 460 opportunistic care to occur, as GPs are able to perform the necessary screening test in their  
48  
49 461 rooms when patients present for other reasons (*skills*). This is unique, compared to  
50  
51 462 Australia's bowel or breast cancer screening programs, which are delivered separately at  
52  
53 463 national and/or state or territory level<sup>30,31</sup>.  
54  
55  
56  
57  
58  
59  
60

1  
2  
3 464 A patient's individual circumstance can limit their acceptance of screening, and being  
4  
5 465 respectful and addressing this was helpful in improving CCS uptake. Among the factors  
6  
7 466 discussed, physical examination concerns and influence of relatives were the most discussed.  
8  
9  
10 467 Consistent with previous findings<sup>26,32</sup>, the influence of relatives either hindered or  
11  
12 468 encouraged CCS participation, depending on whether the relatives supported CCS (*social*  
13  
14 469 *influences*).

15  
16  
17  
18 470 Whilst it is important to acknowledge patient-sided barriers to health care, it is imperative to  
19  
20 471 address the social and environmental influences that produce health inequities in order to  
21  
22 472 implement change<sup>33</sup>. Another prominent finding in our study was the importance of the  
23  
24 473 clinician-patient relationship in influencing CCS uptake (*social/ professional role and*  
25  
26 474 *identity*). A GP's role in Australia is significant, with evidence that patients who have a  
27  
28 475 regular GP have better engagement with the health system<sup>34</sup>. This is also true for CALD  
29  
30 476 populations, and it has been recognised that positive experiences with GPs can strongly  
31  
32 477 influence CALD patients' use of health services<sup>35</sup>. The GPs in our study recognised that their  
33  
34 478 professional relationship with patients, particularly if long-standing, was an important  
35  
36 479 facilitator in encouraging CCS. Allowing time to build rapport was key as it invited trust and  
37  
38 480 familiarity<sup>34</sup>, and allowed GPs to promote education surrounding CCS; improving CALD  
39  
40 481 patients' CCS uptake<sup>16</sup>. Furthermore, advice from multiple HCPs regarding CCS provided a  
41  
42 482 consistent message (*social/ professional role and identity*).

43  
44  
45  
46  
47  
48 483 Barriers relating to knowledge and health literacy were often compounded by language  
49  
50 484 barriers (*environmental context and resources*). GPs reported difficulties when they did not  
51  
52 485 speak the same language as their patients, and used visual aids and interpreter services to  
53  
54 486 communicate (*environmental context and resources*). Although GPs found external  
55  
56 487 interpreter services useful overall, they reflected on numerous challenges associated with  
57  
58 488 their use. This included the increased time and resources needed to organise interpreters in  
59  
60

1  
2  
3 489 consultations, which often resulted in not being able to access an interpreter, particularly with  
4  
5 490 short-notice. In Australia, GPs have access to the national Translating and Interpreting  
6  
7 491 Service (TIS), provided free-of-charge for use with non-English speaking patients<sup>36</sup>.

8  
9  
10 492 However, GPs also need more time in their consultations to facilitate this. Our participants  
11  
12 493 proposed solutions such as offering multiple consultations, longer appointments, and  
13  
14 494 increased funding for such consultations. This is consistent with previous literature that  
15  
16 495 improving financial incentives for GPs to undertake longer consultations may be beneficial  
17  
18 496 for challenging and complex discussions<sup>17,37</sup>.

19  
20  
21  
22 497 Delivering information through different channels has been shown to increase participation in  
23  
24 498 CCS for CALD women<sup>12</sup>. GPs discussed the value of written information material, including  
25  
26 499 pamphlets in patients' own languages, emphasising that GPs need to have easier access to  
27  
28 500 such resources<sup>12,38</sup> (*environmental context and resources*). GPs also suggested using videos  
29  
30 501 as information resources, which has been shown in previous studies to be effective in  
31  
32 502 promoting uptake of cancer screening in targeted populations<sup>39</sup>.

33  
34  
35  
36 503 Additionally, evidence suggests that screening invitations from GPs can be more trusted by  
37  
38 504 patients than invitations from screening hubs<sup>40</sup>. This has implications for improving CCS  
39  
40 505 uptake, as GPs and practice staff routinely send reminders and recalls to patients. Our study  
41  
42 506 adds to this by highlighting that personalised reminders sent in patients' own languages was  
43  
44 507 often more effective. Therefore, more effort should be made to incorporate this for under-  
45  
46 508 screened populations (*environmental context and resources*).

47  
48  
49  
50  
51 509 Another proposed solution by GPs was the use of self-collection HPV tests to reduce  
52  
53 510 inequities in CCS. Self-collection HPV tests have been increasingly studied in recent years as  
54  
55 511 an alternative for under-screened populations<sup>41,42</sup>. In 2017, they were implemented as part of  
56  
57 512 the rNCSP under strict criteria, and since 1 July 2022, they have become available for all  
58  
59  
60



1  
2  
3 513 women eligible for CCS in Australia<sup>43</sup>. They have been generally accepted by GPs for their  
4  
5 514 benefits, but also come with challenges<sup>42</sup>.  
6  
7

### 8 515 **Study strengths and limitations**

10  
11 516 This study's key strength was the use of appropriate research strategies. This included  
12  
13 517 ongoing corroboration between researchers during data analysis, and using an inductive  
14  
15 518 approach to data collection to ensure that participants' responses drove the analysis of results.  
16  
17 519 Additionally, the use of TDF provided an evidence-based approach for study interpretation.  
18  
19  
20 520 This study also has limitations. Firstly, it was beyond the scope of our study to investigate  
21  
22 521 CALD patients' experiences in regards to the barriers and facilitators of CCS. Secondly,  
23  
24 522 difficulties in recruiting GPs, particularly during a pandemic, meant that experiences of only  
25  
26 523 a small number of participants has been described. However, data collection and analysis  
27  
28 524 were undertaken until data saturation was reached, with a further two participants interviewed  
29  
30 525 to confirm findings. Another limitation was that our sample was drawn from metropolitan  
31  
32 526 South Australia only, and data from GPs across Australia, including rural areas, may add  
33  
34 527 further to the study. Similarly, as our study reflects the delivery of CCS within the Australian  
35  
36 528 health care system, it was not within the scope of our study to include nurses, limiting the  
37  
38 529 transferability of our findings to GPs only.  
39  
40  
41 530 Furthermore, due to the qualitative nature of the study, our findings may not be representative  
42  
43 531 of the whole GP population. Instead, the findings provide detailed and theoretically informed  
44  
45 532 insights into the experiences of South Australian GPs in providing CCS to CALD patients.  
46  
47 533 We also note that as our sample of GPs was purposively collected, and they had a general  
48  
49 534 interest in improving CCS participation for CALD women, their experiences may not be  
50  
51 535 reflective of all GPs in Australia.  
52  
53  
54  
55  
56  
57

### 58 536 **Conclusions**

1  
2  
3 537 Our study highlights that GPs recognise that multiple factors influence CALD women's  
4  
5 538 engagement with CCS, and that these barriers and facilitators are all inter-related. Barriers at  
6  
7 539 the individual level, such as patients' subjective beliefs, are not easily fixed. However,  
8  
9 540 recognising them, providing education, and remaining sensitive remain vital in encouraging  
10  
11 541 CCS for these women. Barriers at the organisational level have opportunities for  
12  
13 542 improvement. Improving CALD women's access to GPs they trust, and GPs opportunistically  
14  
15 543 performing CSTs, seem crucial to improving uptake. Additionally, providing GPs with  
16  
17 544 appropriate patient-specific resources, and financial reimbursement for undertaking longer  
18  
19 545 consultations, may assist in addressing some barriers. Self-collection HPV tests are an  
20  
21 546 evolving and promising area in supporting GPs to improve CCS uptake in CALD women, but  
22  
23 547 the above-mentioned barriers still need to be addressed in order for self-collection HPV tests  
24  
25 548 to drastically improve CCS participation.  
26  
27  
28  
29  
30  
31  
32  
33  
34  
35  
36  
37  
38  
39  
40

41 553 **Acknowledgements:** We would like to thank the GPs who participated in our study. The  
42  
43 554 authors also gratefully acknowledge the assistance from Dr Taryn Elliott and Ms Louise  
44  
45 555 Swan (from GPEX) with participant recruitment emails.  
46  
47

48 556 **Contributors:** AC conducted all interviews under the guidance of EH and NS. AC  
49  
50 557 performed analysis of the data, and AC, EH and JB undertook interpretation of the results.  
51  
52 558 AC wrote the first draft of the manuscript. AC, EH, JB and NS contributed to the conception  
53  
54 559 and study design, and all authors revised all drafts and approved the final version of the  
55  
56 560 manuscript.  
57  
58  
59  
60

561 **Competing interests:** None declared.

562 **Funding:** This research project is supported by The Royal Australian College of General  
 563 Practitioners with funding from the Australian Government under the Australian General  
 564 Practice Training Program.

565 **Data sharing statement:** All data relevant to the study are included in the article or uploaded  
 566 as supplementary information.

567 **Ethics approval:** Ethics approval was granted by the Low Risk Human Research Ethics  
 568 Review Group from The University of Adelaide. Ethics ID: H-2021-065.

569

570

571

#### **Reference list:**

572

- 573 1. World Health Organization. WHO guideline for screening and treatment of cervical pre-  
 574 cancer lesions for cervical cancer prevention, second edition. Geneva: World Health  
 575 Organization; 2021.
- 576 2. Australian Institute of Health and Welfare. National Cervical Screening Program monitoring  
 577 report 2020. Canberra: AIHW; 2020.
- 578 3. Saville M, Hawkes D, McLachlan E, Anderson S, Arabena K. Self-collection for under-screened  
 579 women in a National Cervical Screening Program: pilot study. *Current oncology (Toronto)*.  
 580 2018;25(1):e27-32.
- 581 4. Australian Institute of Health and Welfare. Cervical screening in Australia 2019. Canberra:  
 582 AIHW; 2019 Contract No.: CAN 124.
- 583 5. Cancer Council NSW. Eliminating cervical cancer in Australia by 2035. 2021. Available from:  
 584 [https://www.cancercouncil.com.au/research-pt/eliminating-cervical-cancer-in-australia-by-  
 585 2035/](https://www.cancercouncil.com.au/research-pt/eliminating-cervical-cancer-in-australia-by-2035/)
- 586 6. Anaman-Torgbor JA, King J, Correa-Velez I. Barriers and facilitators of cervical cancer  
 587 screening practices among African immigrant women living in Brisbane, Australia. *European  
 588 Journal of Oncology Nursing*. 2017 2017/12/01/;31:22-9.
- 589 7. Alam Z, Shafiee Hanjani L, Dean J, Janda M. Cervical Cancer Screening Among Immigrant  
 590 Women Residing in Australia: A Systematic Review. *Asia Pac J Public Health*. 2021  
 591 Nov;33(8):816-27.
- 592 8. White J, Plompen T, Tao L, Micallef E, Haines T. What is needed in culturally competent  
 593 healthcare systems? A qualitative exploration of culturally diverse patients and professional  
 594 interpreters in an Australian healthcare setting. *BMC Public Health*. 2019  
 595 2019/08/13;19(1):1096.
- 596 9. Parajuli J, Horey D, Avgoulas M-I. Perceived barriers to cervical cancer screening among  
 597 refugee women after resettlement: A qualitative study. *Contemporary Nurse*. 2020  
 598 2020/07/03;56(4):363-75.

- 1  
2  
3 599 10. Marlow LA, Waller J, Wardle J. Barriers to cervical cancer screening among ethnic minority  
4 600 women: a qualitative study. *J Fam Plann Reprod Health Care*. 2015 Oct;41(4):248-54.
- 5 601 11. Leinonen MK, Campbell S, Ursin G, Tropé A, Nygård M. Barriers to cervical cancer screening  
6 602 faced by immigrants: a registry-based study of 1.4 million women in Norway. *Eur J Public*  
7 603 *Health*. 2017 Oct 1;27(5):873-9.
- 8 604 12. Gele AA, Qureshi SA, Kour P, Kumar B, Diaz E. Barriers and facilitators to cervical cancer  
9 605 screening among Pakistani and Somali immigrant women in Oslo: a qualitative study. *Int J*  
10 606 *Womens Health*. 2017;9:487-96.
- 11 607 13. Idehen EE, Pietilä A-M, Kangasniemi M. Barriers and Facilitators to Cervical Screening among  
12 608 Migrant Women of African Origin: A Qualitative Study in Finland. *International journal of*  
13 609 *environmental research and public health*. 2020;17(20):7473.
- 14 610 14. Darj E, Chalise P, Shakya S. Barriers and facilitators to cervical cancer screening in Nepal: A  
15 611 qualitative study. *Sexual & Reproductive Healthcare*. 2019 2019/06/01/;20:20-6.
- 16 612 15. Ferdous M, Lee S, Goopy S, Yang H, Rumana N, Abedin T, et al. Barriers to cervical cancer  
17 613 screening faced by immigrant women in Canada: a systematic scoping review. *BMC Womens*  
18 614 *Health*. 2018;18(1):165.
- 19 615 16. Marques P, Gama A, Santos M, Heleno B, Vermandere H, Dias S. Understanding Cervical  
20 616 Cancer Screening Barriers among Migrant Women: A Qualitative Study with Healthcare and  
21 617 Community Workers in Portugal. *International journal of environmental research and public*  
22 618 *health*. 2021;18(14):7248.
- 23 619 17. Møen KA, Terragni L, Kumar B, Diaz E. Cervical cancer screening among immigrant women in  
24 620 Norway- The healthcare providers' perspectives. *Scand J Prim Health Care*. 2018;36(4):415-  
25 621 22.
- 26 622 18. Alexander KE, Brijnath B, Mazza D. Barriers and enablers to delivery of the Healthy Kids  
27 623 Check: an analysis informed by the Theoretical Domains Framework and COM-B model.  
28 624 *Implementation Science*. 2014 2014/05/23;9(1):60.
- 29 625 19. Cane J, O'Connor D, Michie S. Validation of the theoretical domains framework for use in  
30 626 behaviour change and implementation research. *Implementation Science*. 2012  
31 627 2012/04/24;7(1):37.
- 32 628 20. Johnson MJ, May CR. Promoting professional behaviour change in healthcare: what  
33 629 interventions work, and why? A theory-led overview of systematic reviews. *BMJ Open*.  
34 630 2015;5(9):e008592.
- 35 631 21. Atkins L, Francis J, Islam R, O'Connor D, Patey A, Ivers N, et al. A guide to using the  
36 632 Theoretical Domains Framework of behaviour change to investigate implementation  
37 633 problems. *Implementation Science*. 2017 2017/06/21;12(1):77.
- 38 634 22. Pirotta S, Joham AJ, Moran LJ, Skouteris H, Lim SS. Implementation of evidence-based PCOS  
39 635 lifestyle management guidelines: Perceived barriers and facilitators by consumers using the  
40 636 Theoretical Domains Framework and COM-B Model. *Patient Education and Counseling*. 2021  
41 637 2021/08/01/;104(8):2080-8.
- 42 638 23. Whittenbury K, Kroll L, Dubicka B, Bull ER. Exploring barriers and facilitators for mental  
43 639 health professionals delivering behavioural activation to young people with depression:  
44 640 qualitative study using the Theoretical Domains Framework. *BJPsych Open*. 2022;8(2):e38.
- 45 641 24. Braun V, Clarke V. Using thematic analysis in psychology. *Qualitative Research in Psychology*.  
46 642 2006 2006/01/01;3(2):77-101.
- 47 643 25. Marlow L, McBride E, Varnes L, Waller J. Barriers to cervical screening among older women  
48 644 from hard-to-reach groups: a qualitative study in England. *BMC Womens Health*.  
49 645 2019;19(1):38.
- 50 646 26. Yang H, Li SP, Chen Q, Morgan C. Barriers to cervical cancer screening among rural women in  
51 647 eastern China: a qualitative study. *BMJ Open*. 2019 Mar 13;9(3):e026413.

- 1  
2  
3 648 27. Sultana F, Roeske L, Malloy MJ, McDermott TL, Saville M, Brotherton JML. Implementation  
4 649 of Australia's renewed cervical screening program: Preparedness of general practitioners  
5 650 and nurses. *PLOS ONE*. 2020;15(1):e0228042.  
6 651 28. Jamal J, MacMillan F, McBride KA. Barriers and Facilitators of Breast Cancer Screening  
7 652 amongst Culturally and Linguistically Diverse Women in South Western Sydney: A Qualitative  
8 653 Explorative Study. *International journal of environmental research and public health*.  
9 654 2021;18(17):9129.  
10 655 29. Wentzensen N, Clarke MA, Perkins RB. Impact of COVID-19 on cervical cancer screening:  
11 656 Challenges and opportunities to improving resilience and reduce disparities. *Prev Med*.  
12 657 2021;151:106596.  
13 658 30. Department of Health. About the National Bowel Cancer Screening Program. 2021. Available  
14 659 from: [https://www.health.gov.au/initiatives-and-programs/national-bowel-cancer-](https://www.health.gov.au/initiatives-and-programs/national-bowel-cancer-screening-program/about-the-national-bowel-cancer-screening-program)  
15 660 [screening-program/about-the-national-bowel-cancer-screening-program](https://www.health.gov.au/initiatives-and-programs/national-bowel-cancer-screening-program/about-the-national-bowel-cancer-screening-program)  
16 661 31. Department of Health. About the BreastScreen Australia Program. 2021. Available from:  
17 662 [https://www.health.gov.au/initiatives-and-programs/breastscreen-australia-](https://www.health.gov.au/initiatives-and-programs/breastscreen-australia-program/about-the-breastscreen-australia-program)  
18 663 [program/about-the-breastscreen-australia-program](https://www.health.gov.au/initiatives-and-programs/breastscreen-australia-program/about-the-breastscreen-australia-program)  
19 664 32. Cunningham MS, Skrastins E, Fitzpatrick R, Jindal P, Onoko O, Yeates K, et al. Cervical cancer  
20 665 screening and HPV vaccine acceptability among rural and urban women in Kilimanjaro  
21 666 Region, Tanzania. *BMJ Open*. 2015;5(3):e005828.  
22 667 33. Scanlon B, Brough M, Wyld D, Durham J. Equity across the cancer care continuum for  
23 668 culturally and linguistically diverse migrants living in Australia: a scoping review.  
24 669 *Globalization and Health*. 2021 2021/07/28;17(1):87.  
25 670 34. Kang M, Robards F, Luscombe G, Sancu L, Usherwood T. The relationship between having a  
26 671 regular general practitioner (GP) and the experience of healthcare barriers: a cross-sectional  
27 672 study among young people in NSW, Australia, with oversampling from marginalised groups.  
28 673 *BMC Family Practice*. 2020 2020/10/28;21(1):220.  
29 674 35. Garg P, Ha MT, Eastwood J, Harvey S, Woolfenden S, Murphy E, et al. Explaining culturally  
30 675 and linguistically diverse (CALD) parents' access of healthcare services for developmental  
31 676 surveillance and anticipatory guidance: qualitative findings from the 'Watch Me Grow'  
32 677 study. *BMC Health Services Research*. 2017 2017/03/22;17(1):228.  
33 678 36. Harrison R, Walton M, Chitkara U, Manias E, Chauhan A, Latanik M, et al. Beyond translation:  
34 679 Engaging with culturally and linguistically diverse consumers. *Health Expect*. 2020;23(1):159-  
35 680 68.  
36 681 37. Haycock J, Grivell N, Redman A, Saini B, Vakulin A, Lack L, et al. Primary care management of  
37 682 chronic insomnia: a qualitative analysis of the attitudes and experiences of Australian  
38 683 general practitioners. *BMC Family Practice*. 2021 2021/07/22;22(1):158.  
39 684 38. Dodd RH, Mac OA, McCaffery KJ. Women's experiences of the renewed National Cervical  
40 685 Screening Program in Australia 12 months following implementation: a qualitative study.  
41 686 *BMJ Open*. 2020;10(7):e039041.  
42 687 39. Phillipson L L-TK, Jones S, Pitts L. Improving cancer outcomes among culturally and  
43 688 linguistically diverse communities: a rapid review. *Sax Institute for the Cancer Institute NSW*;  
44 689 2012.  
45 690 40. Young B, Bedford L, Kendrick D, Vedhara K, Robertson JFR, das Nair R. Factors influencing  
46 691 the decision to attend screening for cancer in the UK: a meta-ethnography of qualitative  
47 692 research. *Journal of Public Health*. 2018;40(2):315-39.  
48 693 41. Roeske L. Self-collection of HPV samples: A guide for GPs newsGP. 2018.  
49 694 42. Creagh NS, Zammit C, Brotherton JM, Saville M, McDermott T, Nightingale C, et al. Self-  
50 695 collection cervical screening in the renewed National Cervical Screening Program: a  
51 696 qualitative study. *Med J Aust*. 2021 Oct 18;215(8):354-8.  
52  
53  
54  
55  
56  
57  
58  
59  
60

- 1  
2  
3 697 43. Cancer Council Australia. Self-collected vaginal samples. 2022. Available from:  
4 698 [https://www.cancer.org.au/clinical-guidelines/cervical-cancer-screening/management-of-](https://www.cancer.org.au/clinical-guidelines/cervical-cancer-screening/management-of-oncogenic-hpv-test-results/self-collected-vaginal-samples)  
5 699 [oncogenic-hpv-test-results/self-collected-vaginal-samples](https://www.cancer.org.au/clinical-guidelines/cervical-cancer-screening/management-of-oncogenic-hpv-test-results/self-collected-vaginal-samples)  
6  
7  
8  
9  
10  
11  
12  
13  
14  
15  
16  
17  
18  
19  
20  
21  
22  
23  
24  
25  
26  
27  
28  
29  
30  
31  
32  
33  
34  
35  
36  
37  
38  
39  
40  
41  
42  
43  
44  
45  
46  
47  
48  
49  
50  
51  
52  
53  
54  
55  
56  
57  
58  
59  
60

For peer review only

## Standards for Reporting Qualitative Research (SRQR)\*

<http://www.equator-network.org/reporting-guidelines/srqr/>

Page/line no(s).

### Title and abstract

|                                                                                                                                                                                                                                                              |            |
|--------------------------------------------------------------------------------------------------------------------------------------------------------------------------------------------------------------------------------------------------------------|------------|
| <p><b>Title</b> - Concise description of the nature and topic of the study Identifying the study as qualitative or indicating the approach (e.g., ethnography, grounded theory) or data collection methods (e.g., interview, focus group) is recommended</p> | Page 1     |
| <p><b>Abstract</b> - Summary of key elements of the study using the abstract format of the intended publication; typically includes background, purpose, methods, results, and conclusions</p>                                                               | Pages 2, 3 |

### Introduction

|                                                                                                                                                                     |            |
|---------------------------------------------------------------------------------------------------------------------------------------------------------------------|------------|
| <p><b>Problem formulation</b> - Description and significance of the problem/phenomenon studied; review of relevant theory and empirical work; problem statement</p> | Pages 4, 5 |
| <p><b>Purpose or research question</b> - Purpose of the study and specific objectives or questions</p>                                                              | Page 5     |

### Methods

|                                                                                                                                                                                                                                                                                                                                                                                                             |               |
|-------------------------------------------------------------------------------------------------------------------------------------------------------------------------------------------------------------------------------------------------------------------------------------------------------------------------------------------------------------------------------------------------------------|---------------|
| <p><b>Qualitative approach and research paradigm</b> - Qualitative approach (e.g., ethnography, grounded theory, case study, phenomenology, narrative research) and guiding theory if appropriate; identifying the research paradigm (e.g., postpositivist, constructivist/ interpretivist) is also recommended; rationale**</p>                                                                            | Page 5        |
| <p><b>Researcher characteristics and reflexivity</b> - Researchers' characteristics that may influence the research, including personal attributes, qualifications/experience, relationship with participants, assumptions, and/or presuppositions; potential or actual interaction between researchers' characteristics and the research questions, approach, methods, results, and/or transferability</p> | Pages 5, 6    |
| <p><b>Context</b> - Setting/site and salient contextual factors; rationale**</p>                                                                                                                                                                                                                                                                                                                            | Pages 5, 6    |
| <p><b>Sampling strategy</b> - How and why research participants, documents, or events were selected; criteria for deciding when no further sampling was necessary (e.g., sampling saturation); rationale**</p>                                                                                                                                                                                              | Pages 5, 6, 7 |
| <p><b>Ethical issues pertaining to human subjects</b> - Documentation of approval by an appropriate ethics review board and participant consent, or explanation for lack thereof; other confidentiality and data security issues</p>                                                                                                                                                                        | Pages 6, 26   |
| <p><b>Data collection methods</b> - Types of data collected; details of data collection procedures including (as appropriate) start and stop dates of data collection and analysis, iterative process, triangulation of sources/methods, and modification of procedures in response to evolving study findings; rationale**</p>                                                                             | Pages 6, 7    |

|                       |                                                                                                                                                                                                                                                       |               |
|-----------------------|-------------------------------------------------------------------------------------------------------------------------------------------------------------------------------------------------------------------------------------------------------|---------------|
| 1<br>2<br>3<br>4<br>5 | <b>Data collection instruments and technologies</b> - Description of instruments (e.g., interview guides, questionnaires) and devices (e.g., audio recorders) used for data collection; if/how the instrument(s) changed over the course of the study | Page 6        |
| 6<br>7<br>8           | <b>Units of study</b> - Number and relevant characteristics of participants, documents, or events included in the study; level of participation (could be reported in results)                                                                        | Pages 6, 7, 8 |
| 9<br>10<br>11<br>12   | <b>Data processing</b> - Methods for processing data prior to and during analysis, including transcription, data entry, data management and security, verification of data integrity, data coding, and anonymization/de-identification of excerpts    | Pages 6, 7    |
| 13<br>14<br>15<br>16  | <b>Data analysis</b> - Process by which inferences, themes, etc., were identified and developed, including the researchers involved in data analysis; usually references a specific paradigm or approach; rationale**                                 | Pages 6, 7    |
| 17<br>18<br>19<br>20  | <b>Techniques to enhance trustworthiness</b> - Techniques to enhance trustworthiness and credibility of data analysis (e.g., member checking, audit trail, triangulation); rationale**                                                                | Pages 6, 7    |

## Results/findings

|                      |                                                                                                                                                                                                   |            |
|----------------------|---------------------------------------------------------------------------------------------------------------------------------------------------------------------------------------------------|------------|
| 23<br>24<br>25<br>26 | <b>Synthesis and interpretation</b> - Main findings (e.g., interpretations, inferences, and themes); might include development of a theory or model, or integration with prior research or theory | Pages 7-21 |
| 27<br>28<br>29       | <b>Links to empirical data</b> - Evidence (e.g., quotes, field notes, text excerpts, photographs) to substantiate analytic findings                                                               | Pages 7-21 |

## Discussion

|                                        |                                                                                                                                                                                                                                                                                                                                                                                                             |             |
|----------------------------------------|-------------------------------------------------------------------------------------------------------------------------------------------------------------------------------------------------------------------------------------------------------------------------------------------------------------------------------------------------------------------------------------------------------------|-------------|
| 32<br>33<br>34<br>35<br>36<br>37<br>38 | <b>Integration with prior work, implications, transferability, and contribution(s) to the field</b> - Short summary of main findings; explanation of how findings and conclusions connect to, support, elaborate on, or challenge conclusions of earlier scholarship; discussion of scope of application/generalizability; identification of unique contribution(s) to scholarship in a discipline or field | Pages 21-26 |
| 39                                     | <b>Limitations</b> - Trustworthiness and limitations of findings                                                                                                                                                                                                                                                                                                                                            | Page 25     |

## Other

|                |                                                                                                                                               |         |
|----------------|-----------------------------------------------------------------------------------------------------------------------------------------------|---------|
| 42<br>43<br>44 | <b>Conflicts of interest</b> - Potential sources of influence or perceived influence on study conduct and conclusions; how these were managed | Page 26 |
| 45<br>46       | <b>Funding</b> - Sources of funding and other support; role of funders in data collection, interpretation, and reporting                      | Page 26 |

\*The authors created the SRQR by searching the literature to identify guidelines, reporting standards, and critical appraisal criteria for qualitative research; reviewing the reference lists of retrieved sources; and contacting experts to gain feedback. The SRQR aims to improve the transparency of all aspects of qualitative research by providing clear standards for reporting qualitative research.



1  
2  
3  
4  
5  
6  
7  
8  
9  
10  
11  
12  
13  
14  
15  
16  
17  
18  
19  
20  
21  
22  
23  
24  
25  
26  
27  
28  
29  
30  
31  
32  
33  
34  
35  
36  
37  
38  
39  
40  
41  
42  
43  
44  
45  
46  
47  
48  
49  
50  
51  
52  
53  
54  
55  
56  
57  
58  
59  
60

\*\*The rationale should briefly discuss the justification for choosing that theory, approach, method, or technique rather than other options available, the assumptions and limitations implicit in those choices, and how those choices influence study conclusions and transferability. As appropriate, the rationale for several items might be discussed together.

**Reference:**

O'Brien BC, Harris IB, Beckman TJ, Reed DA, Cook DA. **Standards for reporting qualitative research: a synthesis of recommendations.** *Academic Medicine*, Vol. 89, No. 9 / Sept 2014  
DOI: 10.1097/ACM.0000000000000388

For peer review only

# BMJ Open

## Barriers and facilitators to cervical cancer screening for women from culturally and linguistically diverse backgrounds; a qualitative study of GPs

|                                 |                                                                                                                                                                                                                                                                                                                                                                                                                    |
|---------------------------------|--------------------------------------------------------------------------------------------------------------------------------------------------------------------------------------------------------------------------------------------------------------------------------------------------------------------------------------------------------------------------------------------------------------------|
| Journal:                        | <i>BMJ Open</i>                                                                                                                                                                                                                                                                                                                                                                                                    |
| Manuscript ID                   | bmjopen-2022-062823.R2                                                                                                                                                                                                                                                                                                                                                                                             |
| Article Type:                   | Original research                                                                                                                                                                                                                                                                                                                                                                                                  |
| Date Submitted by the Author:   | 13-Oct-2022                                                                                                                                                                                                                                                                                                                                                                                                        |
| Complete List of Authors:       | Chandrakumar, Abira; The University of Adelaide, Discipline of General Practice, Adelaide Medical School,; GPEX Ltd<br>Hoon, Elizabeth; The University of Adelaide, Discipline of General Practice, Adelaide Medical School,; The University of Adelaide, School of Public Health<br>Benson, Jill; GPEX Ltd<br>Stocks, Nigel; The University of Adelaide, Discipline of General Practice, Adelaide Medical School, |
| <b>Primary Subject Heading</b>: | General practice / Family practice                                                                                                                                                                                                                                                                                                                                                                                 |
| Secondary Subject Heading:      | Qualitative research                                                                                                                                                                                                                                                                                                                                                                                               |
| Keywords:                       | PREVENTIVE MEDICINE, PRIMARY CARE, QUALITATIVE RESEARCH                                                                                                                                                                                                                                                                                                                                                            |
|                                 |                                                                                                                                                                                                                                                                                                                                                                                                                    |

SCHOLARONE™  
Manuscripts



I, the Submitting Author has the right to grant and does grant on behalf of all authors of the Work (as defined in the below author licence), an exclusive licence and/or a non-exclusive licence for contributions from authors who are: i) UK Crown employees; ii) where BMJ has agreed a CC-BY licence shall apply, and/or iii) in accordance with the terms applicable for US Federal Government officers or employees acting as part of their official duties; on a worldwide, perpetual, irrevocable, royalty-free basis to BMJ Publishing Group Ltd ("BMJ") its licensees and where the relevant Journal is co-owned by BMJ to the co-owners of the Journal, to publish the Work in this journal and any other BMJ products and to exploit all rights, as set out in our [licence](#).

The Submitting Author accepts and understands that any supply made under these terms is made by BMJ to the Submitting Author unless you are acting as an employee on behalf of your employer or a postgraduate student of an affiliated institution which is paying any applicable article publishing charge ("APC") for Open Access articles. Where the Submitting Author wishes to make the Work available on an Open Access basis (and intends to pay the relevant APC), the terms of reuse of such Open Access shall be governed by a Creative Commons licence – details of these licences and which [Creative Commons](#) licence will apply to this Work are set out in our licence referred to above.

Other than as permitted in any relevant BMJ Author's Self Archiving Policies, I confirm this Work has not been accepted for publication elsewhere, is not being considered for publication elsewhere and does not duplicate material already published. I confirm all authors consent to publication of this Work and authorise the granting of this licence.

1  
2  
3  
4 1  
5  
6  
7 2 **Barriers and facilitators to cervical cancer screening for women**  
8  
9  
10 3 **from culturally and linguistically diverse backgrounds; a**  
11  
12  
13 4 **qualitative study of GPs**  
14

15 5 Abira Chandrakumar<sup>1,2\*</sup> Elizabeth Hoon<sup>1,3</sup> Jillian Benson<sup>2</sup> Nigel Stocks<sup>1</sup>  
16  
17  
18 6

- 19  
20 7 1. *Discipline of General Practice, Adelaide Medical School, The University of Adelaide,*  
21  
22 8 *Adelaide, Australia*  
23  
24 9 2. *GPEX Ltd., 132 Greenhill Road, Unley, South Australia, Australia*  
25  
26 10 3. *School of Public Health, The University of Adelaide, Adelaide, Australia*  
27  
28  
29  
30 11  
31  
32 12

33  
34 13 **Correspondence:** Abira Chandrakumar, *Discipline of General Practice, Adelaide Medical*  
35  
36 14 *School, The University of Adelaide, Adelaide, Australia*, Email:  
37  
38 15 [abira.chandrakumar@adelaide.edu.au](mailto:abira.chandrakumar@adelaide.edu.au)  
39  
40  
41 16  
42  
43 17  
44

45 18 **Word count (excluding title page, abstract, references, figures and tables):** 5081  
46

47 19 **Key words:** cervical cancer screening; barriers; facilitators; GPs  
48  
49  
50 20  
51  
52  
53  
54  
55  
56  
57  
58  
59  
60

1  
2  
3 21 **ABSTRACT**  
4  
5

6 22 **Objective** To explore general practitioners' (GPs) perspectives on the barriers and facilitators  
7  
8 23 to cervical cancer screening (CCS) for women from culturally and linguistically diverse  
9  
10 24 (CALD) backgrounds.  
11  
12  
13

14 25  
15  
16 26 **Design** Qualitative descriptive study involving semi-structured interviews, with interview guide  
17  
18 27 informed by the Theoretical Domains Framework.  
19  
20  
21

22 28  
23  
24  
25 29 **Setting** Adelaide, South Australia.  
26  
27  
28  
29

30  
31 31 **Participants** Twelve GPs with experience in providing CCS to women from CALD  
32  
33 32 backgrounds participated.  
34  
35

36 33  
37  
38  
39 34 **Results** Four main themes emerged: 'importance of clinician-patient relationship', 'patients'  
40  
41 35 cultural understanding regarding health care and CCS', 'communication and language' and  
42  
43 36 'health-system related'. Each theme had several subthemes. GPs' professional relationship  
44  
45 37 with their patients and repeated advice from other clinicians, together with the provision of  
46  
47 38 opportunistic CCS, were described as facilitators, and encompassed the theme of 'importance  
48  
49 39 of clinician-patient relationship'. This theme also raised the possibility of self-collection  
50  
51 40 human papilloma virus (HPV) tests. Lack of awareness and knowledge, lower priority for  
52  
53 41 cancer screening, and patients' individual circumstances contributed to the theme of  
54  
55 42 'patients' cultural understanding regarding health care and CCS', and often acted as barriers  
56  
57 43 to CCS. 'Communication and language' consisted of language difficulties, interpreter use,  
58  
59  
60

1  
2  
3 44 and use of appropriate resources. Language difficulties was a barrier to the provision of CCS,  
4  
5 45 and GPs used interpreters and written handouts to help overcome this. The theme of ‘health-  
6  
7 46 system related’ involved the increased time needed for CCS consults for CALD women,  
8  
9 47 access to appointments, funding, health promotion and effective use of practice management  
10  
11 48 software.  
12  
13  
14  
15  
16  
17

18

19 50 **Conclusions** This study highlights that multiple, inter-related barriers and facilitators  
20  
21 51 influence CALD women’s engagement with CCS, and that GPs needed to manage all of these  
22  
23 52 factors in order to encourage CCS participation. More efforts are needed to address the  
24  
25 53 barriers to ensure that GPs have access to appropriate resources, and CALD patients have  
26  
27 54 access to GPs they trust.  
28  
29

### 30 55 **STRENGTHS AND LIMITATIONS**

- 31  
32  
33 56 - The use of qualitative methodology allowed for in-depth exploration of GPs’  
34  
35 57 experiences in providing cervical cancer screening to women from CALD  
36  
37 58 backgrounds  
38  
39 59 - The use of the Theoretical Domains Framework in the interview guide and data  
40  
41 60 analysis, provided an evidence-based approach for study interpretation  
42  
43 61 - GPs who participated in our study had a general interest in improving cervical cancer  
44  
45 62 screening participation for CALD women, so their experiences may not be reflective  
46  
47 63 of all GPs in Australia  
48  
49 64 - Participants were drawn from metropolitan South Australia only, and GPs from other  
50  
51 65 areas in Australia, including rural areas, may add further to the study  
52  
53  
54  
55  
56  
57  
58  
59  
60

## 67 **INTRODUCTION**

68 Worldwide, cervical cancer is the fourth most common cancer in women; in both incidence  
69 and mortality, with the highest burden in countries without cervical screening programs<sup>1, 2</sup>.

70 Cervical cancer should largely be preventable, through human papilloma virus (HPV)  
71 immunisation and effective screening programs<sup>2</sup>. In Australia, the renewed National Cervical  
72 Screening Program (rNCSP) has been in place since 1 December 2017, recommending  
73 asymptomatic women aged 25-74 years undertake HPV screening tests every five years,  
74 replacing two-yearly Pap smears<sup>2-4</sup>.

75 However, participation in cervical cancer screening (CCS) remains low, with the Australian  
76 Institute of Health and Welfare reporting that during 2018–2019, only 46% of eligible  
77 women had a screening HPV test as part of the rNCSP<sup>2</sup>. It is well-established that a  
78 significant risk factor for the development of cervical cancer is under-screening or never  
79 being screened<sup>2, 3</sup>. Therefore, less than half of eligible women participating in CCS, in a  
80 country with a well-developed screening program, needs to be addressed, in particular as  
81 Australia plans to eliminate cervical cancer by 2035<sup>5</sup>.

82 Current literature suggests that inequalities in screening persist with lower rates of CCS in  
83 women from culturally and linguistically diverse (CALD) backgrounds<sup>6, 7</sup>. Australia is a  
84 multicultural nation, with growing migrant populations, and this calls to strengthen our  
85 healthcare access and outcomes for these populations<sup>8</sup>. Addressing such inequalities will be  
86 key to Australia's success in eliminating cervical cancer.

87 Research has been performed in Australia<sup>6, 7, 9</sup> and internationally<sup>10-14</sup> exploring CALD  
88 patients' perspectives on the barriers and facilitators to CCS. Patient barriers have included  
89 poor health literacy, cultural beliefs and stigma, and English proficiency<sup>6, 10, 12</sup>. Comparably,  
90 linguistic strategies, and increasing patients' awareness surrounding CCS are described as

1  
2  
3 91 facilitators<sup>12,13</sup>. Although international studies have explored health care providers' (HCP)  
4  
5 92 perspectives on CCS; reporting barriers and facilitators relating to knowledge,  
6  
7  
8 93 communication, and access to healthcare services<sup>15-17</sup>, very little is known about Australian  
9  
10 94 HCP perspectives on this issue. To the best of the authors' knowledge, Australian general  
11  
12 95 practitioners' (GPs) perspectives on barriers and facilitators to CCS in CALD patients have  
13  
14  
15 96 not been documented.

16  
17 97 There is growing recognition that delivering healthcare involves complex underlying  
18  
19 98 processes within specific contexts<sup>18,19</sup>. In order to effectively bring about change in  
20  
21  
22 99 healthcare, we need to theoretically understand the influences on professional behaviours, so  
23  
24 100 that they are considered in interventions aimed at change<sup>18-20</sup>. The Theoretical Domains  
25  
26 101 Framework (TDF) is a conceptual, validated framework that has synthesised 33 behavioural  
27  
28 102 theories forming 14 domains, and is a useful tool to support researchers in understanding the  
29  
30 103 environmental, social, and cognitive influences on behaviour<sup>21</sup>. It has been widely applied  
31  
32 104 across healthcare-related research focussed on changing clinical and professional behaviours,  
33  
34 105 including understanding barriers and facilitators to behaviours related to healthcare  
35  
36 106 outcomes<sup>21-23</sup>.

37  
38  
39  
40  
41 107 Therefore, using TDF, this study aims to explore GPs' perspectives on the barriers and  
42  
43 108 facilitators to CCS for women from CALD backgrounds. By discovering the views of those  
44  
45 109 who primarily provide CCS in the community, we aim to gain a deeper understanding of the  
46  
47 110 barriers faced in every-day clinical practice, and insights into factors that can be used to  
48  
49 111 increase participation in CCS for these women.

## 52 53 112 **METHODS**

### 54 55 56 113 **Study design and setting**



1  
2  
3 114 A qualitative descriptive study involving in-depth semi-structured interviews was conducted  
4  
5 115 in Adelaide, South Australia. Semi-structured interviews enabled exploration of participants'  
6  
7 116 experiences. The interviews were undertaken by the lead author, AC; a GP Registrar.  
8  
9

### 10 117 **Recruitment**

11  
12  
13 118 Study participants were recruited through purposive sampling. General practices located in  
14  
15 119 communities with migrant populations, registered with GPEx (South Australia's Regional  
16  
17 120 Training Organisation for General Practice Registrars), and/or professional contacts of  
18  
19 121 Discipline of General Practice at The University of Adelaide, were identified, and GPs with  
20  
21 122 experience in providing cervical screening tests (CSTs) to women from CALD backgrounds  
22  
23 123 were invited to participate in interviews through email, telephone, or snowballing methods.  
24  
25 124 GPs were reimbursed with a \$AUD100 gift card for their time.  
26  
27  
28

### 29 30 31 125 **Data collection**

32  
33 126 A semi-structured interview guide informed by TDF<sup>21</sup> (supplementary file) was developed by  
34  
35 127 AC and EH, who has extensive experience in qualitative methodologies. The TDF provided a  
36  
37 128 method to understand GPs' and patients' behaviours related to CCS theoretically<sup>18</sup>. The  
38  
39 129 interview guide covered questions regarding GPs' experiences in working with women from  
40  
41 130 CALD backgrounds, in particular relating to CCS, and covered TDF domains including  
42  
43 131 knowledge, skills, and social/ professional role and identity. Two pilot interviews were  
44  
45 132 undertaken to develop AC's interview skills, and minor revisions to the interview guide were  
46  
47 133 made based on feedback. Data from the pilot interviews were not included in the final  
48  
49 134 analysis.  
50  
51  
52

53  
54 135 A total of twelve interviews were conducted between May and September 2021. Ten were  
55  
56 136 conducted via telephone and two via video teleconference (using Zoom application). The use  
57  
58 137 of remote technology improved access for participants. Interviews lasted between 19 and 35  
59  
60

1  
2  
3 138 minutes. Written informed consent was received from all participants prior to interviews.  
4

5 139 Field notes were taken by AC during each interview.  
6  
7

## 8 140 **Data analysis** 9

10  
11 141 All but one of the interviews were digitally audio-recorded and transcribed verbatim. One  
12  
13 142 participant did not consent to audio-recording, and comprehensive written notes were instead  
14  
15 143 taken with their consent. AC listened to all audio-recordings in full and cross-checked them  
16  
17 144 with the transcripts for accuracy. Any identifying information was removed from the  
18  
19 145 transcripts.  
20  
21  
22

23 146 Braun & Clarke's six-phase framework guided thematic analysis<sup>24</sup>. Hard copies of transcripts  
24  
25 147 were reviewed by AC prior to coding, producing a brief summary outlining the key findings  
26  
27 148 within each transcript. Data were managed using QSR N-Vivo software. Codes were  
28  
29 149 generated inductively. Initial codes were generated by independent coding of three transcripts  
30  
31 150 by AC, EH and JB, and codes agreed upon through discussion. The subsequent transcripts  
32  
33 151 were coded by AC, and discussed regularly with EH, JB and NS for refinement. The final  
34  
35 152 codes were then structured into themes and sub-themes. In the final phase of analysis, this  
36  
37 153 inductive approach was followed by reflexive consideration of the potential fit between the  
38  
39 154 themes generated and the TDF domains. This approach supported the interpretation of the  
40  
41 155 data, and fits with Braun and Clarke's overall analysis framework<sup>24</sup>. Two further interviews  
42  
43 156 were then conducted to supplement data from the first ten interviews, to confirm findings and  
44  
45 157 attain data saturation.  
46  
47  
48  
49  
50

## 51 158 **Patient and public involvement** 52

53  
54 159 Our study focussed on GPs' perspectives on the barriers and facilitators to CCS for women  
55  
56 160 from CALD backgrounds, and patient and the public were not involved at this stage.  
57  
58  
59  
60

162 **RESULTS**163 **Participant characteristics**

164 The characteristics of the 12 participants are in Table 1. 92% of the GPs were female. 8 GPs  
 165 (67%) used another language for consulting (in addition to English).

166 **TABLE 1: Characteristics of the participants**

| Characteristics                          | GP Participants ( <i>n</i> =12) |
|------------------------------------------|---------------------------------|
| Age (years)                              |                                 |
| ≤ 35                                     | 2                               |
| 36 – 54                                  | 9                               |
| ≥ 55                                     | 1                               |
| Sex                                      |                                 |
| Female                                   | 11                              |
| Male                                     | 1                               |
| Length of practice as GP (years)         |                                 |
| <5                                       | 3                               |
| 5 – 15                                   | 4                               |
| >15                                      | 5                               |
| Clinical workload as GP per week (hours) |                                 |
| 0 – 15                                   | 2                               |
| 16 – 30                                  | 5                               |
| >30                                      | 5                               |

| Languages used for consulting other than English |   |
|--------------------------------------------------|---|
| Nil (other than English)                         | 4 |
| Bengali                                          | 3 |
| Mandarin/ Chinese                                | 2 |
| Urdu                                             | 2 |
| Vietnamese                                       | 1 |

167

168 **Themes**

169 There are four major themes reported based on our thematic analysis. Within each theme,  
 170 several sub-themes were identified, and supported by quotations from the interviews. These  
 171 are described below. Themes and sub-themes are also summarised in Table 2.

172 **TABLE 2: Themes and sub-themes**

| Themes                                                                                           | Sub-themes                                                                                                                                                                                                                           |
|--------------------------------------------------------------------------------------------------|--------------------------------------------------------------------------------------------------------------------------------------------------------------------------------------------------------------------------------------|
| <ul style="list-style-type: none"> <li>• Importance of clinician-patient relationship</li> </ul> | <ul style="list-style-type: none"> <li>• GPs' professional relationship with their patients</li> <li>• Providing opportunistic CSTs</li> <li>• Other clinician-patient relationships</li> <li>• Self-collection HPV tests</li> </ul> |

|                                                                                                                    |                                                                                                                                                                                                                                                                                                                                                                                                                                                                                                                                                         |
|--------------------------------------------------------------------------------------------------------------------|---------------------------------------------------------------------------------------------------------------------------------------------------------------------------------------------------------------------------------------------------------------------------------------------------------------------------------------------------------------------------------------------------------------------------------------------------------------------------------------------------------------------------------------------------------|
| <ul style="list-style-type: none"> <li>• Patients' cultural understanding regarding health care and CCS</li> </ul> | <ul style="list-style-type: none"> <li>• Lack of awareness and knowledge</li> <li>• Lower priority for cancer screening <ul style="list-style-type: none"> <li>○ Not on patients' agenda</li> <li>○ Patients' subjective beliefs and perceptions of low risk</li> <li>○ COVID-19 pandemic</li> </ul> </li> <li>• Importance of patients' individual circumstances <ul style="list-style-type: none"> <li>○ Patient concerns surrounding physical examination</li> <li>○ Influence of relatives</li> <li>○ Previous sexual trauma</li> </ul> </li> </ul> |
| <ul style="list-style-type: none"> <li>• Communication and language</li> </ul>                                     | <ul style="list-style-type: none"> <li>• Language difficulties</li> <li>• Interpreter use</li> <li>• Use of appropriate resources</li> </ul>                                                                                                                                                                                                                                                                                                                                                                                                            |
| <ul style="list-style-type: none"> <li>• Health-system related</li> </ul>                                          | <ul style="list-style-type: none"> <li>• Increased time needed</li> <li>• Access to appointments</li> <li>• Funding</li> <li>• Health promotion</li> <li>• Use of practice management system</li> </ul>                                                                                                                                                                                                                                                                                                                                                 |

1  
2  
3 174 **Theme 1: Importance of clinician-patient relationship**  
4

5 175 **1.1 GPs' professional relationship with their patients**  
6  
7

8 176 GPs identified several helpful factors in providing CSTs to women from CALD backgrounds.  
9

10 177 These included their professional experience providing CSTs, length of experience in  
11  
12 178 working with CALD women, and being a female GP.

13  
14  
15  
16 179 *“I see a lot of Vietnamese patients...[but] I see everybody else, not just Vietnamese.*

17  
18 180 *So... Thai, Israel, Iran, African, everybody” (GP8).*  
19

20  
21 181 Being a male GP was identified as a barrier, as patients were less likely to see a male GP for  
22  
23 182 CSTs.

24  
25  
26 183 *“My experience is that as a male doctor, we have to be very clear about how... we*  
27  
28 184 *approach cervical screening” (GP4).*  
29

30  
31 185 A continuing doctor-patient relationship was frequently a facilitator.  
32  
33

34 186 *“To have a long-term GP or someone you're familiar with is really helpful... So, they*  
35  
36 187 *will let you do what you think is good for them or they will bring it up because they're*  
37  
38 188 *comfortable” (GP8).*  
39  
40

41  
42 189 GPs also described the importance of building rapport with their patient to facilitate screening  
43  
44 190 discussions.

45  
46  
47 191 *“I build rapport and build a relationship with the patient first. So that then they trust*  
48  
49 192 *me more... about some of these more sensitive issues and exams, and are more likely*  
50  
51 193 *to agree to it later down the track” (GP7).*  
52  
53

54  
55 194

56  
57  
58 195 **1.2 Providing opportunistic CSTs**  
59  
60

1  
2  
3 196 Being opportunistic was important. This included initiating the first discussion regarding  
4  
5 197 CCS, and seeking out the opportunity during other care provision, such as during preparation  
6  
7  
8 198 of chronic disease GP management plans, peri-partum consults, and consults surrounding  
9  
10 199 sexual health.

11  
12  
13 200 *“I think just being opportunistic... for the practitioner to be aware to offer these*  
14  
15 201 *primary health prevention measures... to incorporate the cervical screening... and*  
16  
17 202 *offer it all the time”* (GP5)

18  
19  
20 203 GPs described that they needed to be aware of the lower screening rates in women from  
21  
22 204 CALD backgrounds, and take the initiative to raise CCS with them.

23  
24  
25 205 *“Being conscious of the fact that often people of these backgrounds are under-*  
26  
27 206 *screened so that then we can make up for it by putting in that special effort”* (GP7)

28  
29  
30 207

### 31 32 33 208 **1.3 Other clinician-patient relationships**

34  
35  
36 209 Repeated advice regarding CCS from multiple health care providers, including practice  
37  
38 210 nurses and hospital midwives, was described as a facilitator.

39  
40  
41 211

42  
43 212 *“One thing that has really helped, if there's multiple health care providers telling*  
44  
45 213 *them the same things”* (GP9).

46  
47  
48 214

### 49 50 51 215 **1.4 Self-collection HPV tests**

52  
53  
54 216 Most participants were aware of the availability of self-collection HPV tests under the rNCSP  
55  
56 217 for under-screened women and viewed the tests positively, describing that *“it's a good*  
57  
58 218 *opportunity to screen the under-screened patient”* (GP11).

1  
2  
3 219 However, GPs also identified several challenges to self-collection tests, and many of these  
4  
5 220 relate to the already identified barriers in our findings.  
6  
7

8 221

## 11 222 **Theme 2: Patients' cultural understanding regarding health care and CCS**

### 14 223 **2.1 Lack of awareness and knowledge**

16 224 Lack of awareness and access to reliable information regarding the rNCSP and cervical  
17  
18 225 cancer were significant barriers. GPs reported that CSTs were a new concept to some  
19  
20 226 patients, whilst others may have heard of CSTs (or pap smears), but had limited knowledge  
21  
22 227 about their purpose, the procedure involved, or about cervical cancer.  
23  
24

25  
26 228 *"If they don't understand how important it is, they're just not going to accept it"*

27  
28  
29 229 (GP9).

30  
31  
32 230 It was reported that some patients' knowledge gap was universal for all screening programs  
33  
34 231 offered in Australia.

35  
36 232 *"It's not just about [CCS]. It was about bowel cancer screening... mammograms as*  
37  
38 233 *well"* (GP9).

39  
40  
41 234 Participants also reflected on the differences in participation between different cultural  
42  
43 235 groups.

44  
45  
46 236 *"...[Patients from] Cambodia, who have equivalent programs there... had raised it*  
47  
48 237 *with me, and asked when they're going to be due here"* (GP7).

49  
50  
51  
52 238 Conversely, migration from countries without CCS deepened the lack of awareness.

53  
54  
55 239 *"Sometimes it's just, sort of, lack of exposure to this knowledge... they've recently*  
56  
57 240 *come here... back in their countries, this doesn't exist"* (GP9).

58  
59  
60



241

## 2.2 Lower priority for cancer screening

### 2.2.1 Not on patients' agenda

244 GPs described that women from CALD backgrounds often viewed CCS with less importance  
245 and priority, and it was commonly not on a patient's agenda when presenting to her GP.

246 Participants identified that multiple factors were often involved in preventive care taking “a  
247 *bit of a sideline*” (GP7). Patients from CALD backgrounds often presented with acute  
248 medical issues, which may be more complex, requiring more time within the consult.

249 *“You've got so much other stuff to get through and everything's taking a bit longer*  
250 *generally. I've also got quite a few women from refugee backgrounds who, I guess,*  
251 *are going through a lot of difficult things and sometimes find it hard just to get to the*  
252 *doctor and make it to appointments and when they come, [they] have quite a few*  
253 *pressing issues that need to be addressed. And so, a lot of that preventative stuff can*  
254 *get lost in the background a bit unfortunately” (GP7).*

255

### 2.2.2 Patients' subjective beliefs and perceptions of low risk

257 GPs described that some patients had pre-determined beliefs, and false perceptions of low  
258 risk, regarding CCS. This included beliefs that they would not contract HPV as a result of the  
259 same lifetime sexual partner, with some patients having difficulty acknowledging “*how they*  
260 *got [HPV]*” (GP6).

261 GPs also identified that some patients believed their older age lowered their risk of cervical  
262 cancer.

1  
2  
3 263 *“Ones that are like over 60... over 65... or that they have no longer have a sexual*  
4  
5 264 *partner. And then mistakenly think that, well, because they [are] not sexually*  
6  
7 265 *active... they don't have to do anything” (GP8).*  
8  
9

10 266

### 13 267 **2.2.3 COVID-19 pandemic**

16 268 The COVID-19 pandemic was also described to have impacted CCS participation; across  
17  
18 269 women from all backgrounds.

21 270 *“During the [COVID-19] pandemic... we've seen a marked decrease in the number of*  
22  
23 271 *people presenting for just primary screening” (GP5).*  
24  
25

26 272

## 28 273 **2.3 Importance of patients' individual circumstances**

### 31 274 **2.3.1 Patient concerns surrounding physical examination**

34 275 A common report was patients' reluctance and embarrassment surrounding cervical  
35  
36 276 examinations, as they involve speculums and can be intrusive.

39 277 *“I find that... women from particular cultures... could be quite ashamed to get*  
40  
41 278 *exposed... does make the actual procedure sometimes a little bit difficult” (GP12).*  
42  
43

44 279 Patients were less comfortable with CSTs when children were present, and it was difficult for  
45  
46 280 GPs to manage supervising the children and performing the examination.

50 281 *“I do think sometimes young woman with really tiny children, it could be a real*  
51  
52 282 *barrier to get the time. They never get a chance to come in without their kids”*  
53  
54 283 *(GP1).*  
55  
56

### 57 284 **2.3.2 Influence of relatives**

58  
59  
60

1  
2  
3 285 GPs noted that if a patient's relatives were not participating, this reduced the patient's own  
4  
5 286 willingness to engage with CCS.

7  
8 287 *"There are some beliefs and they've reached a certain age and like they just outright*  
9  
10 288 *say "none of my sisters and mothers have had it and they're fine" (GP9).*

11  
12  
13 289 However, relatives can also have a positive influence, with some GPs describing that the  
14  
15  
16 290 presence of a support person, in particular daughters bringing their mothers, had improved  
17  
18 291 uptake.

19  
20  
21 292 *"Another thing I've found helpful is, I've had a few patients from different cultural*  
22  
23 293 *backgrounds where the daughter and the mom have come together for their pap*  
24  
25 294 *smears, and the daughter... interpreted for the mom... the daughter has encouraged*  
26  
27 295 *the mum to come along" (GP7).*

### 28 296 **2.3.3 Previous sexual trauma**

29  
30  
31 297 A history of female genital mutilation was raised by some GPs as negatively affecting CCS  
32  
33  
34 298 participation, with an emphasis on the need for GPs to be more sensitive and respectful about  
35  
36 299 this issue.

37  
38  
39 300 *"Women that have had genital mutilation...exploring... how comfortable they are and*  
40  
41 301 *the sort of speculum that you might choose... a bit more gently you might go about it"*  
42  
43 302 *(GP10).*

44  
45  
46 303 Similarly, cervical examinations can be distressing for patients with a history of sexual abuse.

47  
48  
49 304 *"I've found much more barriers when women have been in sexual abuse" (GP1).*

50  
51  
52 305

## 53 306 **Theme 3: Communication and language**

### 3.1 Language difficulties

Most participants described challenges in promoting CCS when speaking a different language to their patient, or when patients were not fluent in English.

*“Its a difficulty explaining [CSTs] in their own terms... what exactly this means”*  
(GP12).

Using simple words helped with communication, as did the use of anatomy models and visual aids.

*“[I] find this a new concept and [women from CALD backgrounds] have absolutely no idea... I say this is a cancer screening... I may show a picture”* (GP4).

*“I really show them the speculum, probably tell them that there are smaller ones if they were worried about internal exams, actually showing the brush and let them have a feel of the brush”* (GP5).

### 3.2 Interpreter use

Language barriers were often overcome by using interpreters. GPs valued effective communication, with one GP reflecting that CCS is *“something that good communication is absolutely crucial for, to make sure you're getting proper consent and the patient is really comfortable”* (GP7).

Easy access to telephone interpreters was important, but challenges included inconvenience, increased time, miscommunication errors, and sensitivities in using an interpreter for a gynaecological examination.

*“In an ideal circumstance, you'd have a telephone interpreter... that take 5 minutes to line up at best... maybe it's something that you can plan for another day”* (GP2).

1  
2  
3 329 Another GP shared that using family members as interpreters provides variable results.  
4  
5

6 330 *“A relative could be good or they could be terrible... could talk over with them*

7  
8 331 *afterwards and say this is what it’s about”* (GP1).  
9

### 10 11 332 **3.3. Use of appropriate resources**

12  
13 333 GPs used written handouts, and highlighted the value of providing reliable information to  
14  
15 334 patients in their own language. Some GPs were aware of where to access such information,  
16  
17  
18 335 whilst others expressed the need for easier access to these resources.

19  
20 336 *“Something that could be useful would be to look into if there’s pamphlets or*

21  
22 337 *information sheets in various languages that could be given to patients”* (GP7).  
23  
24  
25

26 338 Waiting room resources, such as posters and pamphlets, were mentioned as impacting patient  
27  
28 339 education and awareness. Additionally, written resources regarding the rNCSP was raised as  
29  
30 340 important in the provision of consistent information.

31  
32 341 *“It can be confusing for the patients about how it’s swapped over [to rNCSP], but*

33  
34 342 *probably some kind of handout you can give for that”* (GP1).  
35  
36  
37

38 343 Similarly, provision of information through videos and radio communication in different  
39  
40 344 languages was suggested to supplement the written resources.

41  
42 345 *“Some videos on the website in [patients’] own language would be a good decision...*

43  
44 346 *and I know that there is some like radios that are given in like different languages just for*

45  
46 347 *this... I think [patients’] acceptance would be better that its coming from their population”*

47  
48 348 (GP3).  
49  
50

51  
52 349

## 53 54 350 **Theme 4: Health-system related**

### 55 56 57 351 **4.1 Increased time needed**

58  
59  
60

1  
2  
3 352 Allocating sufficient time was key to improving uptake, particularly in the presence of  
4  
5 353 language barriers and interpreters. GPs employed strategies such as longer appointments, or  
6  
7 354 discussions over multiple appointments.  
8  
9

10 355 *“You have to warn them... bring them back again and see if they’ve got any question,*  
11  
12 *so maybe third time finally you’d do [the CST]” (GP1).*  
13 356

14  
15 357 GPs expressed concerns regarding non-attendance when patients are asked to re-schedule  
16  
17 358 appointments.  
18  
19

20 359 *“I think that anything where you raise it and then try and think that they’ll come*  
21  
22 *back, you lose... your opportunity... they don’t return. So, one of the advantages is if*  
23 360 *you are comfortable you can do it quite quickly, then you get it all done and dusted in*  
24  
25 361 *that consultation” (GP10).*  
26  
27 362

28  
29  
30 363 GPs also identified the need for investing more time in explaining and performing CSTs.  
31  
32

33 364 *“I have to explain [CSTs] before I go ahead. So that’s the challenge... Rather than*  
34  
35 365 *the [non-CALD] population, they would be expecting, they know what is going to*  
36  
37 366 *happen and how we interpret” (GP3).*  
38  
39

40  
41 367 However, GPs described time-pressure challenges when spending more time on one  
42  
43 368 particular health issue, or when attempting to schedule multiple aspects of care into one  
44  
45 369 consultation.  
46  
47

48 370 *“Now there’s even the cervical cancer vaccine that needs to be brought up as well. So,*  
49  
50 371 *it’s a lot to talk about.” (GP8).*  
51  
52

53 372

54  
55 373 **4.2 Access to appointments**  
56  
57  
58  
59  
60

1  
2  
3 374 Improving access to appointments can improve a patient's participation in screening. Some  
4  
5 375 GPs suggested the use of women-only or CCS-specific clinics.

6  
7  
8 376 *"We can even run like a cervical screening clinic, as a separate one... where it could*  
9  
10 377 *be like women presenting and it could be a more welcoming environment for the*  
11  
12  
13 378 *women."* (GP12).

14  
15  
16 379 Additionally, GPs reflected upon the possibility of easily accessible appointment times to  
17  
18 380 encourage wider participation.

19  
20  
21 381 *"It's interesting to see how many women come on a Saturday morning for cervical*  
22  
23 382 *screening... I'm sure that might be the same for CALD backgrounds"* (GP10).

24  
25  
26 383 Some GPs also described transport access issues, and the need for some patients to rely on  
27  
28 384 family members to attend appointments.

29  
30  
31 385 *"Maybe accessing the service could be a problem for them. Maybe they are*  
32  
33 386 *dependent on their husband or somebody else to make an appointment for them and*  
34  
35 387 *bring them for the test."* (GP12).

### 36 37 38 39 388 **4.3 Funding**

40  
41  
42 389 Issues surrounding Medicare eligibility and costs of CCS were raised as barriers, particularly  
43  
44 390 when coupled with the lack of perceived necessity.

45  
46  
47 391 *"If they don't hold a Medicare [card] and they have got some sort of a private*  
48  
49 392 *insurance... do they think they might have to pay for some tests? They perceive this as*  
50  
51 393 *an unimportant task"* (GP9).

52  
53  
54  
55 394 A GP reflected that working in a bulk-billing clinic acted as a facilitator for these patients.  
56  
57  
58  
59  
60

1  
2  
3 395 *“For screening, if there's nothing that's wrong with [women from CALD*  
4  
5 396 *backgrounds], I don't think that they will pay... I don't think that I will be as*  
6  
7 397 *successful, as I am, running the screening program, if I charge this woman” (GP8).*  
8  
9

10 398 However, the GP also mentioned that more funding should be allocated to facilitating CCS,  
11  
12  
13 399 in particular for under-screened populations.  
14

15  
16 400 *“I think, for us, the funding would be a big thing. To give us more time so we can*  
17  
18 401 *educate” (GP8).*  
19

#### 20 21 402 **4.4 Health promotion**

22  
23  
24 403 GPs advocated for culturally-sensitive public health campaigns and health promotional  
25  
26 404 materials, particularly in different languages, to raise awareness. Ideas offered included  
27  
28 405 Government initiatives and campaigns, and use of social media, radio services, and  
29  
30 406 television.  
31  
32

33  
34 407 *“Maybe some more public health campaign so that people have already been*  
35  
36 408 *introduced to the concept [of CSTs] outside of general practice” (GP2).*  
37  
38

#### 39 409 **4.5 Use of practice management system**

40  
41  
42 410 An effective recall and reminder system, incorporating telephone calls, text messages and  
43  
44 411 sending letters to patients, was considered a facilitator. GPs reflected on the importance of  
45  
46 412 placing patients on the reminder system to ensure follow up, and engaged their practice  
47  
48 413 nurses and receptionists to assist with recalls.  
49  
50

51  
52 414 *“We actually spend a lot of manpower... to draw out the recalls and actively calling*  
53  
54 415 *people. Sometimes they don't respond to a message, we call them, we keep trying and*  
55  
56 416 *then we send a letter” (GP8).*  
57  
58  
59  
60



1  
2  
3 417 GPs mentioned that reminders were more effective when they were sent in patients' own  
4  
5 418 languages.

6  
7  
8 419 *"I've got a template letter for [language] ...and now I have a text message in*  
9  
10 420 *[language] ...it doesn't need to be long... but this is their language"* (GP8).

11  
12  
13 421 Additionally, GPs stated that prompts during consultations, and when booking appointments,  
14  
15 422 can also increase patient participation by initiating the discussion.

16  
17  
18  
19 423

20  
21 424 **DISCUSSION**

22  
23  
24 425 The study findings provide in-depth insight into GPs' perspectives about the barriers and  
25  
26 426 facilitators to CCS for an under-screened population group - women from CALD  
27  
28 427 backgrounds. GPs identified several barriers at the individual and organisational levels; often  
29  
30 428 co-existing to challenge the provision of CCS in these women. Similarly, GPs reflected on  
31  
32 429 several personal facilitators that encouraged and increased CCS.

33  
34  
35  
36 430 The TDF was used to further interpret our study's themes. We used the TDF domains of  
37  
38 431 knowledge, skills, social/professional role and identity, beliefs about consequences,  
39  
40 432 environmental context and resources, and social influences, within our interpretation. As our  
41  
42 433 study demonstrates the inter-relationship of the barriers and facilitators, our four prominent  
43  
44 434 themes transect multiple domains of the TDF. To highlight this, we have not described our  
45  
46 435 findings under domain headings as discrete constructs, but rather refer to these domains  
47  
48 436 (*italics used to signal this*) in the following discussion.

49  
50  
51  
52  
53 437 Our study found that lack of awareness or insufficient *knowledge* regarding CCS continues to  
54  
55 438 hinder screening participation in CALD women, consistent with previous literature<sup>13,25-27</sup>.  
56  
57 439 Knowledge gaps in the process and importance of screening often reflected low health  
58  
59 440 literacy and lack of exposure to CCS in patients' countries of birth (*environmental context*

1  
2  
3 441 *and resources*). GPs mentioned that patients were more proactive if they migrated from  
4  
5 442 countries where CCS is offered as primary screening. GPs also reflected that some patients'  
6  
7 443 lack of knowledge translated to other primary screening programs, such as breast cancer and  
8  
9 444 bowel cancer screening. This is not surprising given that CALD women can be unfamiliar  
10  
11 445 with preventive health services<sup>12,15</sup> (*beliefs about consequences*), indicating that widespread  
12  
13 446 interventions are required to improve CALD patients' cancer screening participation<sup>28</sup>.  
14  
15 447 Patients who did not view cancer screening, specifically CCS, with high importance, or  
16  
17 448 patients who perceived themselves to be at low risk of cervical cancer, were less likely to  
18  
19 449 present for screening (*knowledge, beliefs about consequences*). GPs identified that CALD  
20  
21 450 patients' needs can be more complex, and cancer screening was often not on their agenda.  
22  
23 451 Additionally, the COVID-19 pandemic, which has caused significant reductions in preventive  
24  
25 452 healthcare, including CCS<sup>29</sup>, was echoed by our GPs as having a negative impact on CCS  
26  
27 453 participation rate (*environmental context and resources*).  
28  
29  
30  
31  
32  
33 454 It was highlighted that opportunistically offering CCS to women with low knowledge,  
34  
35 455 awareness and priority, was a significant facilitator, and at times, a necessity, in improving  
36  
37 456 uptake (*skills, social/ professional role and identity*). GPs demonstrated variable approaches  
38  
39 457 to this, with some offering it as part of chronic disease care, and others during consults  
40  
41 458 surrounding sexual health. Although other studies have also highlighted that CALD women  
42  
43 459 tend to undertake CCS when offered opportunistically<sup>16</sup>, this was a prominent idea amongst  
44  
45 460 our participants. As CCS in Australia is commonly performed by GPs, this allows for  
46  
47 461 opportunistic care to occur, as GPs are able to perform the necessary screening test in their  
48  
49 462 rooms when patients present for other reasons (*skills*). This is unique, compared to  
50  
51 463 Australia's bowel or breast cancer screening programs, which are delivered separately at  
52  
53 464 national and/or state or territory level<sup>30,31</sup>.  
54  
55  
56  
57  
58  
59  
60

1  
2  
3 465 A patient's individual circumstance can limit their acceptance of screening, and being  
4  
5 466 respectful and addressing this was helpful in improving CCS uptake. Among the factors  
6  
7 467 discussed, physical examination concerns and influence of relatives were the most discussed.  
8  
9  
10 468 Consistent with previous findings<sup>26,32</sup>, the influence of relatives either hindered or  
11  
12 469 encouraged CCS participation, depending on whether the relatives supported CCS (*social*  
13  
14 470 *influences*).

15  
16  
17  
18 471 Whilst it is important to acknowledge patient-sided barriers to health care, it is imperative to  
19  
20 472 address the social and environmental influences that produce health inequities in order to  
21  
22 473 implement change<sup>33</sup>. Another prominent finding in our study was the importance of the  
23  
24 474 clinician-patient relationship in influencing CCS uptake (*social/ professional role and*  
25  
26 475 *identity*). A GP's role in Australia is significant, with evidence that patients who have a  
27  
28 476 regular GP have better engagement with the health system<sup>34</sup>. This is also true for CALD  
29  
30 477 populations, and it has been recognised that positive experiences with GPs can strongly  
31  
32 478 influence CALD patients' use of health services<sup>35</sup>. The GPs in our study recognised that their  
33  
34 479 professional relationship with patients, particularly if long-standing, was an important  
35  
36 480 facilitator in encouraging CCS. Allowing time to build rapport was key as it invited trust and  
37  
38 481 familiarity<sup>34</sup>, and allowed GPs to promote education surrounding CCS; improving CALD  
39  
40 482 patients' CCS uptake<sup>16</sup>. Furthermore, advice from multiple HCPs regarding CCS provided a  
41  
42 483 consistent message (*social/ professional role and identity*).

43  
44  
45  
46  
47  
48 484 Barriers relating to knowledge and health literacy were often compounded by language  
49  
50 485 barriers (*environmental context and resources*). GPs reported difficulties when they did not  
51  
52 486 speak the same language as their patients, and used visual aids and interpreter services to  
53  
54 487 communicate (*environmental context and resources*). Although GPs found external  
55  
56 488 interpreter services useful overall, they reflected on numerous challenges associated with  
57  
58 489 their use. This included the increased time and resources needed to organise interpreters in  
59  
60

1  
2  
3 490 consultations, which often resulted in not being able to access an interpreter, particularly with  
4  
5 491 short-notice. In Australia, GPs have access to the national Translating and Interpreting  
6  
7 492 Service (TIS), provided free-of-charge for use with non-English speaking patients<sup>36</sup>.

8  
9  
10 493 However, GPs also need more time in their consultations to facilitate this. Our participants  
11  
12 494 proposed solutions such as offering multiple consultations, longer appointments, and  
13  
14 495 increased funding for such consultations. This is consistent with previous literature that  
15  
16 496 improving financial incentives for GPs to undertake longer consultations may be beneficial  
17  
18 497 for challenging and complex discussions<sup>17,37</sup>.

19  
20  
21  
22 498 Delivering information through different channels has been shown to increase participation in  
23  
24 499 CCS for CALD women<sup>12</sup>. GPs discussed the value of written information material, including  
25  
26 500 pamphlets in patients' own languages, emphasising that GPs need to have easier access to  
27  
28 501 such resources<sup>12,38</sup> (*environmental context and resources*). GPs also suggested using videos  
29  
30 502 as information resources, which has been shown in previous studies to be effective in  
31  
32 503 promoting uptake of cancer screening in targeted populations<sup>39</sup>.

33  
34  
35  
36 504 Additionally, evidence suggests that screening invitations from GPs can be more trusted by  
37  
38 505 patients than invitations from screening hubs<sup>40</sup>. This has implications for improving CCS  
39  
40 506 uptake, as GPs and practice staff routinely send reminders and recalls to patients. Our study  
41  
42 507 adds to this by highlighting that personalised reminders sent in patients' own languages was  
43  
44 508 often more effective. Therefore, more effort should be made to incorporate this for under-  
45  
46 509 screened populations (*environmental context and resources*).

47  
48  
49  
50  
51 510 Another proposed solution by GPs was the use of self-collection HPV tests to reduce  
52  
53 511 inequities in CCS. Self-collection HPV tests have been increasingly studied in recent years as  
54  
55 512 an alternative for under-screened populations<sup>41,42</sup>. In 2017, they were implemented as part of  
56  
57 513 the rNCSP under strict criteria, and since 1 July 2022, they have become available for all  
58  
59  
60

1  
2  
3 514 women eligible for CCS in Australia<sup>43</sup>. They have been generally accepted by GPs for their  
4  
5 515 benefits, but also come with challenges<sup>42</sup>.  
6  
7

### 8 516 **Study strengths and limitations**

10  
11 517 This study's key strength was the use of appropriate research strategies. This included  
12  
13 518 ongoing corroboration between researchers during data analysis, and using an inductive  
14  
15 519 approach to data collection to ensure that participants' responses drove the analysis of results.  
16  
17 520 Additionally, the use of TDF provided an evidence-based approach for study interpretation.  
18  
19 521 This study also has limitations. Firstly, it was beyond the scope of our study to investigate  
20  
21 522 CALD patients' experiences in regards to the barriers and facilitators of CCS. Secondly,  
22  
23 523 difficulties in recruiting GPs, particularly during a pandemic, meant that experiences of only  
24  
25 524 a small number of participants has been described. However, data collection and analysis  
26  
27 525 were undertaken until data saturation was reached, with a further two participants interviewed  
28  
29 526 to confirm findings. Another limitation was that our sample was drawn from metropolitan  
30  
31 527 South Australia only, and data from GPs across Australia, including rural areas, may add  
32  
33 528 further to the study. Similarly, as our study reflects the delivery of CCS within the Australian  
34  
35 529 health care system, it was not within the scope of our study to include nurses, limiting the  
36  
37 530 transferability of our findings to GPs only.  
38  
39  
40  
41 531 Furthermore, due to the qualitative nature of the study, our findings may not be representative  
42  
43 532 of the whole GP population. Instead, the findings provide detailed and theoretically informed  
44  
45 533 insights into the experiences of South Australian GPs in providing CCS to CALD patients.  
46  
47 534 We also note that as our sample of GPs was purposively collected, and they had a general  
48  
49 535 interest in improving CCS participation for CALD women, their experiences may not be  
50  
51 536 reflective of all GPs in Australia.  
52  
53  
54  
55  
56

### 57 537 **Conclusions**

1  
2  
3 538 Our study highlights that GPs recognise that multiple factors influence CALD women's  
4  
5 539 engagement with CCS, and that these barriers and facilitators are all inter-related. Barriers at  
6  
7 540 the individual level, such as patients' subjective beliefs, are not easily fixed. However,  
8  
9 541 recognising them, providing education, and remaining sensitive remain vital in encouraging  
10  
11 542 CCS for these women. Barriers at the organisational level have opportunities for  
12  
13 543 improvement. Improving CALD women's access to GPs they trust, and GPs opportunistically  
14  
15 544 performing CSTs, seem crucial to improving uptake. Additionally, providing GPs with  
16  
17 545 appropriate patient-specific resources, and financial reimbursement for undertaking longer  
18  
19 546 consultations, may assist in addressing some barriers. Self-collection HPV tests are an  
20  
21 547 evolving and promising area in supporting GPs to improve CCS uptake in CALD women, but  
22  
23 548 the above-mentioned barriers still need to be addressed in order for self-collection HPV tests  
24  
25 549 to drastically improve CCS participation.  
26  
27  
28  
29  
30  
31  
32  
33  
34  
35  
36  
37  
38  
39  
40

41 554 **Acknowledgements:** We would like to thank the GPs who participated in our study. The  
42  
43 555 authors also gratefully acknowledge the assistance from Dr Taryn Elliott and Ms Louise  
44  
45 556 Swan (from GPEX) with participant recruitment emails.  
46  
47

48 557 **Contributors:** AC conducted all interviews under the guidance of EH and NS. AC  
49  
50 558 performed analysis of the data, and AC, EH and JB undertook interpretation of the results.  
51  
52 559 AC wrote the first draft of the manuscript. AC, EH, JB and NS contributed to the conception  
53  
54 560 and study design, and all authors revised all drafts and approved the final version of the  
55  
56 561 manuscript.  
57  
58  
59  
60

1  
2  
3 562 **Competing interests:** There are no competing interests for any author.  
4  
5

6 563 **Funding:** This research project is supported by The Royal Australian College of General  
7  
8 564 Practitioners with funding from the Australian Government under the Australian General  
9  
10 565 Practice Training Program.  
11  
12

13  
14 566 **Data sharing statement:** All data relevant to the study are included in the article or uploaded  
15  
16 567 as supplementary information.  
17

18 568 **Ethics approval:** Ethics approval was granted by the Low Risk Human Research Ethics  
19  
20 569 Review Group from The University of Adelaide. Ethics ID: H-2021-065.  
21  
22

23  
24 570

25  
26 571

27  
28  
29  
30 572 **Reference list:**  
31 573

- 32 574 1. World Health Organization. WHO guideline for screening and treatment of cervical pre-  
33 575 cancer lesions for cervical cancer prevention, second edition. Geneva: World Health  
34 576 Organization; 2021.  
35 577 2. Australian Institute of Health and Welfare. National Cervical Screening Program monitoring  
36 578 report 2020. Canberra: AIHW; 2020.  
37 579 3. Saville M, Hawkes D, McLachlan E, Anderson S, Arabena K. Self-collection for under-screened  
38 580 women in a National Cervical Screening Program: pilot study. *Current oncology (Toronto)*.  
39 581 2018;25(1):e27-32.  
40 582 4. Australian Institute of Health and Welfare. Cervical screening in Australia 2019. Canberra:  
41 583 AIHW; 2019 Contract No.: CAN 124.  
42 584 5. Cancer Council NSW. Eliminating cervical cancer in Australia by 2035. 2021. Available from:  
43 585 [https://www.cancercouncil.com.au/research-pt/eliminating-cervical-cancer-in-australia-by-](https://www.cancercouncil.com.au/research-pt/eliminating-cervical-cancer-in-australia-by-2035/)  
44 586 [2035/](https://www.cancercouncil.com.au/research-pt/eliminating-cervical-cancer-in-australia-by-2035/)  
45 587 6. Anaman-Torgbor JA, King J, Correa-Velez I. Barriers and facilitators of cervical cancer  
46 588 screening practices among African immigrant women living in Brisbane, Australia. *European*  
47 589 *Journal of Oncology Nursing*. 2017 2017/12/01/;31:22-9.  
48 590 7. Alam Z, Shafiee Hanjani L, Dean J, Janda M. Cervical Cancer Screening Among Immigrant  
49 591 Women Residing in Australia: A Systematic Review. *Asia Pac J Public Health*. 2021  
50 592 Nov;33(8):816-27.  
51 593 8. White J, Plompen T, Tao L, Micallef E, Haines T. What is needed in culturally competent  
52 594 healthcare systems? A qualitative exploration of culturally diverse patients and professional  
53 595 interpreters in an Australian healthcare setting. *BMC Public Health*. 2019  
54 596 2019/08/13;19(1):1096.  
55 597 9. Parajuli J, Horey D, Avgoulas M-I. Perceived barriers to cervical cancer screening among  
56 598 refugee women after resettlement: A qualitative study. *Contemporary Nurse*. 2020  
57 599 2020/07/03;56(4):363-75.

- 1  
2  
3 600 10. Marlow LA, Waller J, Wardle J. Barriers to cervical cancer screening among ethnic minority  
4 601 women: a qualitative study. *J Fam Plann Reprod Health Care*. 2015 Oct;41(4):248-54.
- 5 602 11. Leinonen MK, Campbell S, Ursin G, Tropé A, Nygård M. Barriers to cervical cancer screening  
6 603 faced by immigrants: a registry-based study of 1.4 million women in Norway. *Eur J Public*  
7 604 *Health*. 2017 Oct 1;27(5):873-9.
- 8 605 12. Gele AA, Qureshi SA, Kour P, Kumar B, Diaz E. Barriers and facilitators to cervical cancer  
9 606 screening among Pakistani and Somali immigrant women in Oslo: a qualitative study. *Int J*  
10 607 *Womens Health*. 2017;9:487-96.
- 11 608 13. Idehen EE, Pietilä A-M, Kangasniemi M. Barriers and Facilitators to Cervical Screening among  
12 609 Migrant Women of African Origin: A Qualitative Study in Finland. *International journal of*  
13 610 *environmental research and public health*. 2020;17(20):7473.
- 14 611 14. Darj E, Chalise P, Shakya S. Barriers and facilitators to cervical cancer screening in Nepal: A  
15 612 qualitative study. *Sexual & Reproductive Healthcare*. 2019 2019/06/01/;20:20-6.
- 16 613 15. Ferdous M, Lee S, Goopy S, Yang H, Rumana N, Abedin T, et al. Barriers to cervical cancer  
17 614 screening faced by immigrant women in Canada: a systematic scoping review. *BMC Womens*  
18 615 *Health*. 2018;18(1):165.
- 19 616 16. Marques P, Gama A, Santos M, Heleno B, Vermandere H, Dias S. Understanding Cervical  
20 617 Cancer Screening Barriers among Migrant Women: A Qualitative Study with Healthcare and  
21 618 Community Workers in Portugal. *International journal of environmental research and public*  
22 619 *health*. 2021;18(14):7248.
- 23 620 17. Møen KA, Terragni L, Kumar B, Diaz E. Cervical cancer screening among immigrant women in  
24 621 Norway- The healthcare providers' perspectives. *Scand J Prim Health Care*. 2018;36(4):415-  
25 622 22.
- 26 623 18. Alexander KE, Brijnath B, Mazza D. Barriers and enablers to delivery of the Healthy Kids  
27 624 Check: an analysis informed by the Theoretical Domains Framework and COM-B model.  
28 625 *Implementation Science*. 2014 2014/05/23;9(1):60.
- 29 626 19. Cane J, O'Connor D, Michie S. Validation of the theoretical domains framework for use in  
30 627 behaviour change and implementation research. *Implementation Science*. 2012  
31 628 2012/04/24;7(1):37.
- 32 629 20. Johnson MJ, May CR. Promoting professional behaviour change in healthcare: what  
33 630 interventions work, and why? A theory-led overview of systematic reviews. *BMJ Open*.  
34 631 2015;5(9):e008592.
- 35 632 21. Atkins L, Francis J, Islam R, O'Connor D, Patey A, Ivers N, et al. A guide to using the  
36 633 Theoretical Domains Framework of behaviour change to investigate implementation  
37 634 problems. *Implementation Science*. 2017 2017/06/21;12(1):77.
- 38 635 22. Pirotta S, Joham AJ, Moran LJ, Skouteris H, Lim SS. Implementation of evidence-based PCOS  
39 636 lifestyle management guidelines: Perceived barriers and facilitators by consumers using the  
40 637 Theoretical Domains Framework and COM-B Model. *Patient Education and Counseling*. 2021  
41 638 2021/08/01/;104(8):2080-8.
- 42 639 23. Whittenbury K, Kroll L, Dubicka B, Bull ER. Exploring barriers and facilitators for mental  
43 640 health professionals delivering behavioural activation to young people with depression:  
44 641 qualitative study using the Theoretical Domains Framework. *BJPsych Open*. 2022;8(2):e38.
- 45 642 24. Braun V, Clarke V. Using thematic analysis in psychology. *Qualitative Research in Psychology*.  
46 643 2006 2006/01/01;3(2):77-101.
- 47 644 25. Marlow L, McBride E, Varnes L, Waller J. Barriers to cervical screening among older women  
48 645 from hard-to-reach groups: a qualitative study in England. *BMC Womens Health*.  
49 646 2019;19(1):38.
- 50 647 26. Yang H, Li SP, Chen Q, Morgan C. Barriers to cervical cancer screening among rural women in  
51 648 eastern China: a qualitative study. *BMJ Open*. 2019 Mar 13;9(3):e026413.
- 52  
53  
54  
55  
56  
57  
58  
59  
60



- 1  
2  
3 649 27. Sultana F, Roeske L, Malloy MJ, McDermott TL, Saville M, Brotherton JML. Implementation  
4 650 of Australia's renewed cervical screening program: Preparedness of general practitioners  
5 651 and nurses. PLOS ONE. 2020;15(1):e0228042.  
6 652 28. Jamal J, MacMillan F, McBride KA. Barriers and Facilitators of Breast Cancer Screening  
7 653 amongst Culturally and Linguistically Diverse Women in South Western Sydney: A Qualitative  
8 654 Explorative Study. International journal of environmental research and public health.  
9 655 2021;18(17):9129.  
10 656 29. Wentzensen N, Clarke MA, Perkins RB. Impact of COVID-19 on cervical cancer screening:  
11 657 Challenges and opportunities to improving resilience and reduce disparities. Prev Med.  
12 658 2021;151:106596.  
13 659 30. Department of Health. About the National Bowel Cancer Screening Program. 2021. Available  
14 660 from: [https://www.health.gov.au/initiatives-and-programs/national-bowel-cancer-](https://www.health.gov.au/initiatives-and-programs/national-bowel-cancer-screening-program/about-the-national-bowel-cancer-screening-program)  
15 661 [screening-program/about-the-national-bowel-cancer-screening-program](https://www.health.gov.au/initiatives-and-programs/national-bowel-cancer-screening-program/about-the-national-bowel-cancer-screening-program)  
16 662 31. Department of Health. About the BreastScreen Australia Program. 2021. Available from:  
17 663 [https://www.health.gov.au/initiatives-and-programs/breastscreen-australia-](https://www.health.gov.au/initiatives-and-programs/breastscreen-australia-program/about-the-breastscreen-australia-program)  
18 664 [program/about-the-breastscreen-australia-program](https://www.health.gov.au/initiatives-and-programs/breastscreen-australia-program/about-the-breastscreen-australia-program)  
19 665 32. Cunningham MS, Skrastins E, Fitzpatrick R, Jindal P, Onoko O, Yeates K, et al. Cervical cancer  
20 666 screening and HPV vaccine acceptability among rural and urban women in Kilimanjaro  
21 667 Region, Tanzania. BMJ Open. 2015;5(3):e005828.  
22 668 33. Scanlon B, Brough M, Wyld D, Durham J. Equity across the cancer care continuum for  
23 669 culturally and linguistically diverse migrants living in Australia: a scoping review.  
24 670 Globalization and Health. 2021 2021/07/28;17(1):87.  
25 671 34. Kang M, Robards F, Luscombe G, Sancu L, Usherwood T. The relationship between having a  
26 672 regular general practitioner (GP) and the experience of healthcare barriers: a cross-sectional  
27 673 study among young people in NSW, Australia, with oversampling from marginalised groups.  
28 674 BMC Family Practice. 2020 2020/10/28;21(1):220.  
29 675 35. Garg P, Ha MT, Eastwood J, Harvey S, Woolfenden S, Murphy E, et al. Explaining culturally  
30 676 and linguistically diverse (CALD) parents' access of healthcare services for developmental  
31 677 surveillance and anticipatory guidance: qualitative findings from the 'Watch Me Grow'  
32 678 study. BMC Health Services Research. 2017 2017/03/22;17(1):228.  
33 679 36. Harrison R, Walton M, Chitkara U, Manias E, Chauhan A, Latanik M, et al. Beyond translation:  
34 680 Engaging with culturally and linguistically diverse consumers. Health Expect. 2020;23(1):159-  
35 681 68.  
36 682 37. Haycock J, Grivell N, Redman A, Saini B, Vakulin A, Lack L, et al. Primary care management of  
37 683 chronic insomnia: a qualitative analysis of the attitudes and experiences of Australian  
38 684 general practitioners. BMC Family Practice. 2021 2021/07/22;22(1):158.  
39 685 38. Dodd RH, Mac OA, McCaffery KJ. Women's experiences of the renewed National Cervical  
40 686 Screening Program in Australia 12 months following implementation: a qualitative study.  
41 687 BMJ Open. 2020;10(7):e039041.  
42 688 39. Phillipson L L-TK, Jones S, Pitts L. Improving cancer outcomes among culturally and  
43 689 linguistically diverse communities: a rapid review. Sax Institute for the Cancer Institute NSW;  
44 690 2012.  
45 691 40. Young B, Bedford L, Kendrick D, Vedhara K, Robertson JFR, das Nair R. Factors influencing  
46 692 the decision to attend screening for cancer in the UK: a meta-ethnography of qualitative  
47 693 research. Journal of Public Health. 2018;40(2):315-39.  
48 694 41. Roeske L. Self-collection of HPV samples: A guide for GPs newsGP. 2018.  
49 695 42. Creagh NS, Zammit C, Brotherton JM, Saville M, McDermott T, Nightingale C, et al. Self-  
50 696 collection cervical screening in the renewed National Cervical Screening Program: a  
51 697 qualitative study. Med J Aust. 2021 Oct 18;215(8):354-8.  
52  
53  
54  
55  
56  
57  
58  
59  
60

- 1  
2  
3 698 43. Cancer Council Australia. Self-collected vaginal samples. 2022. Available from:  
4 699 [https://www.cancer.org.au/clinical-guidelines/cervical-cancer-screening/management-of-](https://www.cancer.org.au/clinical-guidelines/cervical-cancer-screening/management-of-oncogenic-hpv-test-results/self-collected-vaginal-samples)  
5 700 [oncogenic-hpv-test-results/self-collected-vaginal-samples](https://www.cancer.org.au/clinical-guidelines/cervical-cancer-screening/management-of-oncogenic-hpv-test-results/self-collected-vaginal-samples)  
6  
7  
8  
9  
10  
11  
12  
13  
14  
15  
16  
17  
18  
19  
20  
21  
22  
23  
24  
25  
26  
27  
28  
29  
30  
31  
32  
33  
34  
35  
36  
37  
38  
39  
40  
41  
42  
43  
44  
45  
46  
47  
48  
49  
50  
51  
52  
53  
54  
55  
56  
57  
58  
59  
60

For peer review only

Participant # \_\_\_\_\_

### **Semi structured interview questions**

1. How much experience do you have in regards to providing cervical cancer screening in women from CALD backgrounds?
2. Could you tell me how you would normally bring up and discuss cervical screening tests with women from CALD backgrounds?
3. Is there anything to consider in the treatment of women from CALD backgrounds, generally speaking?
  - *Follow up question:* What about any specific considerations for cervical screening in women from CALD backgrounds?
4. Based on your experiences, have there been any factors that have made it harder to provide cervical screening to women from CALD backgrounds?
  - *Follow up question:* Could you give me some examples of issues/ problems that you have encountered?
  - *Follow up question:* CALD women are an under-screened population when it comes to cervical screening. What do you think are some factors that may be contributing to this?
  - *Prompts (based on literature; only if needed):*
    - o e.g. time factors, language barriers, lack of awareness/ education, competing work schedules, public awareness, doctor-patient relationship
5. Based on your experiences, what factors have assisted you in providing cervical screening in women from CALD backgrounds?
  - *Follow up question:* What further factors do you think could assist GPs in being better equipped to encourage CST participation in women from CALD backgrounds?
  - *Follow up question:* What do you think CALD patients might find useful?
6. How confident do you feel in providing cervical cancer screening to women from CALD backgrounds?
  - *Follow up question:* Could you tell me more about this?
  - *Follow up question:* Can you think of anything that could assist you in becoming more confident?
  - *Follow up question:* Have you had any training or educational resources in working with women from CALD backgrounds
    - o If so, what did you find useful?
    - o If not, what would you prioritise?

- 1  
2  
3  
4  
5  
6  
7  
8  
9  
10  
11  
12  
13  
14  
15  
16  
17  
18  
19  
20  
21  
22  
23  
24  
25  
26  
27  
28  
29  
30  
31  
32  
33  
34  
35  
36  
37  
38  
39  
40  
41  
42  
43  
44  
45  
46  
47  
48  
49  
50  
51  
52  
53  
54  
55  
56  
57  
58  
59  
60
7. We're just going to talk a little about self-collection HPV tests now. What do you know about self-collection HPV tests?
- *Follow up question:* What would be the benefits and challenges of self-collection tests?
  - *Follow up question:* If they were offered in the future, would you be able to incorporate this into your practice?
    - o How would you achieve this?
  - *Follow up question:* How do you think they will be taken up by your participants?
8. Is there anything else that you would like to comment on about cervical screening, including barriers and facilitators that we have not covered here?

**These are all the questions we had for you today. I would like to thank you for your time and efforts in participating.**

## Standards for Reporting Qualitative Research (SRQR)\*

<http://www.equator-network.org/reporting-guidelines/srqr/>

Page/line no(s).

### Title and abstract

|                                                                                                                                                                                                                                                              |            |
|--------------------------------------------------------------------------------------------------------------------------------------------------------------------------------------------------------------------------------------------------------------|------------|
| <p><b>Title</b> - Concise description of the nature and topic of the study Identifying the study as qualitative or indicating the approach (e.g., ethnography, grounded theory) or data collection methods (e.g., interview, focus group) is recommended</p> | Page 1     |
| <p><b>Abstract</b> - Summary of key elements of the study using the abstract format of the intended publication; typically includes background, purpose, methods, results, and conclusions</p>                                                               | Pages 2, 3 |

### Introduction

|                                                                                                                                                                     |            |
|---------------------------------------------------------------------------------------------------------------------------------------------------------------------|------------|
| <p><b>Problem formulation</b> - Description and significance of the problem/phenomenon studied; review of relevant theory and empirical work; problem statement</p> | Pages 4, 5 |
| <p><b>Purpose or research question</b> - Purpose of the study and specific objectives or questions</p>                                                              | Page 5     |

### Methods

|                                                                                                                                                                                                                                                                                                                                                                                                             |               |
|-------------------------------------------------------------------------------------------------------------------------------------------------------------------------------------------------------------------------------------------------------------------------------------------------------------------------------------------------------------------------------------------------------------|---------------|
| <p><b>Qualitative approach and research paradigm</b> - Qualitative approach (e.g., ethnography, grounded theory, case study, phenomenology, narrative research) and guiding theory if appropriate; identifying the research paradigm (e.g., postpositivist, constructivist/ interpretivist) is also recommended; rationale**</p>                                                                            | Page 5        |
| <p><b>Researcher characteristics and reflexivity</b> - Researchers' characteristics that may influence the research, including personal attributes, qualifications/experience, relationship with participants, assumptions, and/or presuppositions; potential or actual interaction between researchers' characteristics and the research questions, approach, methods, results, and/or transferability</p> | Pages 5, 6    |
| <p><b>Context</b> - Setting/site and salient contextual factors; rationale**</p>                                                                                                                                                                                                                                                                                                                            | Pages 5, 6    |
| <p><b>Sampling strategy</b> - How and why research participants, documents, or events were selected; criteria for deciding when no further sampling was necessary (e.g., sampling saturation); rationale**</p>                                                                                                                                                                                              | Pages 5, 6, 7 |
| <p><b>Ethical issues pertaining to human subjects</b> - Documentation of approval by an appropriate ethics review board and participant consent, or explanation for lack thereof; other confidentiality and data security issues</p>                                                                                                                                                                        | Pages 6, 26   |
| <p><b>Data collection methods</b> - Types of data collected; details of data collection procedures including (as appropriate) start and stop dates of data collection and analysis, iterative process, triangulation of sources/methods, and modification of procedures in response to evolving study findings; rationale**</p>                                                                             | Pages 6, 7    |

|                       |                                                                                                                                                                                                                                                       |               |
|-----------------------|-------------------------------------------------------------------------------------------------------------------------------------------------------------------------------------------------------------------------------------------------------|---------------|
| 1<br>2<br>3<br>4<br>5 | <b>Data collection instruments and technologies</b> - Description of instruments (e.g., interview guides, questionnaires) and devices (e.g., audio recorders) used for data collection; if/how the instrument(s) changed over the course of the study | Page 6        |
| 6<br>7<br>8           | <b>Units of study</b> - Number and relevant characteristics of participants, documents, or events included in the study; level of participation (could be reported in results)                                                                        | Pages 6, 7, 8 |
| 9<br>10<br>11<br>12   | <b>Data processing</b> - Methods for processing data prior to and during analysis, including transcription, data entry, data management and security, verification of data integrity, data coding, and anonymization/de-identification of excerpts    | Pages 6, 7    |
| 13<br>14<br>15<br>16  | <b>Data analysis</b> - Process by which inferences, themes, etc., were identified and developed, including the researchers involved in data analysis; usually references a specific paradigm or approach; rationale**                                 | Pages 6, 7    |
| 17<br>18<br>19<br>20  | <b>Techniques to enhance trustworthiness</b> - Techniques to enhance trustworthiness and credibility of data analysis (e.g., member checking, audit trail, triangulation); rationale**                                                                | Pages 6, 7    |

## Results/findings

|                      |                                                                                                                                                                                                   |            |
|----------------------|---------------------------------------------------------------------------------------------------------------------------------------------------------------------------------------------------|------------|
| 23<br>24<br>25<br>26 | <b>Synthesis and interpretation</b> - Main findings (e.g., interpretations, inferences, and themes); might include development of a theory or model, or integration with prior research or theory | Pages 7-21 |
| 27<br>28<br>29       | <b>Links to empirical data</b> - Evidence (e.g., quotes, field notes, text excerpts, photographs) to substantiate analytic findings                                                               | Pages 7-21 |

## Discussion

|                                        |                                                                                                                                                                                                                                                                                                                                                                                                             |             |
|----------------------------------------|-------------------------------------------------------------------------------------------------------------------------------------------------------------------------------------------------------------------------------------------------------------------------------------------------------------------------------------------------------------------------------------------------------------|-------------|
| 32<br>33<br>34<br>35<br>36<br>37<br>38 | <b>Integration with prior work, implications, transferability, and contribution(s) to the field</b> - Short summary of main findings; explanation of how findings and conclusions connect to, support, elaborate on, or challenge conclusions of earlier scholarship; discussion of scope of application/generalizability; identification of unique contribution(s) to scholarship in a discipline or field | Pages 21-26 |
| 39                                     | <b>Limitations</b> - Trustworthiness and limitations of findings                                                                                                                                                                                                                                                                                                                                            | Page 25     |

## Other

|                |                                                                                                                                               |         |
|----------------|-----------------------------------------------------------------------------------------------------------------------------------------------|---------|
| 42<br>43<br>44 | <b>Conflicts of interest</b> - Potential sources of influence or perceived influence on study conduct and conclusions; how these were managed | Page 26 |
| 45<br>46       | <b>Funding</b> - Sources of funding and other support; role of funders in data collection, interpretation, and reporting                      | Page 26 |

\*The authors created the SRQR by searching the literature to identify guidelines, reporting standards, and critical appraisal criteria for qualitative research; reviewing the reference lists of retrieved sources; and contacting experts to gain feedback. The SRQR aims to improve the transparency of all aspects of qualitative research by providing clear standards for reporting qualitative research.

1  
2  
3  
4  
5  
6  
7  
8  
9  
10  
11  
12  
13  
14  
15  
16  
17  
18  
19  
20  
21  
22  
23  
24  
25  
26  
27  
28  
29  
30  
31  
32  
33  
34  
35  
36  
37  
38  
39  
40  
41  
42  
43  
44  
45  
46  
47  
48  
49  
50  
51  
52  
53  
54  
55  
56  
57  
58  
59  
60

\*\*The rationale should briefly discuss the justification for choosing that theory, approach, method, or technique rather than other options available, the assumptions and limitations implicit in those choices, and how those choices influence study conclusions and transferability. As appropriate, the rationale for several items might be discussed together.

**Reference:**

O'Brien BC, Harris IB, Beckman TJ, Reed DA, Cook DA. **Standards for reporting qualitative research: a synthesis of recommendations.** *Academic Medicine*, Vol. 89, No. 9 / Sept 2014  
DOI: 10.1097/ACM.0000000000000388

For peer review only
