# Supplementary material for: La percepción del paisaje como elemento modernizador de las sociedades
Source: HighWire-hosted journal article supplement (doi:10.1136/bmjopen-2022-062823), 2005-01-01
Supplement: bmjopen-2022-062823supp001_data_supplement.pdf [file bmjopen-2022-062823supp001_data_supplement.pdf]

Participant # \_\_\_\_\_

### **Semi structured interview questions**

1. How much experience do you have in regards to providing cervical cancer screening in women from CALD backgrounds?
2. Could you tell me how you would normally bring up and discuss cervical screening tests with women from CALD backgrounds?
3. Is there anything to consider in the treatment of women from CALD backgrounds, generally speaking?
  - *Follow up question:* What about any specific considerations for cervical screening in women from CALD backgrounds?
4. Based on your experiences, have there been any factors that have made it harder to provide cervical screening to women from CALD backgrounds?
  - *Follow up question:* Could you give me some examples of issues/ problems that you have encountered?
  - *Follow up question:* CALD women are an under-screened population when it comes to cervical screening. What do you think are some factors that may be contributing to this?
  - *Prompts (based on literature; only if needed):*
    - o e.g. time factors, language barriers, lack of awareness/ education, competing work schedules, public awareness, doctor-patient relationship
5. Based on your experiences, what factors have assisted you in providing cervical screening in women from CALD backgrounds?
  - *Follow up question:* What further factors do you think could assist GPs in being better equipped to encourage CST participation in women from CALD backgrounds?
  - *Follow up question:* What do you think CALD patients might find useful?
6. How confident do you feel in providing cervical cancer screening to women from CALD backgrounds?
  - *Follow up question:* Could you tell me more about this?
  - *Follow up question:* Can you think of anything that could assist you in becoming more confident?
  - *Follow up question:* Have you had any training or educational resources in working with women from CALD backgrounds
    - o If so, what did you find useful?
    - o If not, what would you prioritise?

7. We're just going to talk a little about self-collection HPV tests now. What do you know about self-collection HPV tests?
  - *Follow up question:* What would be the benefits and challenges of self-collection tests?
  - *Follow up question:* If they were offered in the future, would you be able to incorporate this into your practice?
    - o How would you achieve this?
  - *Follow up question:* How do you think they will be taken up by your participants?
8. Is there anything else that you would like to comment on about cervical screening, including barriers and facilitators that we have not covered here?

**These are all the questions we had for you today. I would like to thank you for your time and efforts in participating.**
